# Supplementary material for: Anti-Autophagy Mechanism of Zhi Gan Prescription Based on Network Pharmacology in Nonalcoholic Steatohepatitis Rats
Source: Front Pharmacol. 2021 Jul 19;12:708479. doi: 10.3389/fphar.2021.708479 (PMC8326404; doi:10.3389/fphar.2021.708479)
Supplement: Supplementary file 1 [file DataSheet1.ZIP › FigShares/FigShares/bioactive ingredients of ZGP.xlsx]

## Sheet: 党参
Codonopsis Radix		MW	OB	DL
MOL001006	poriferasta-7,22E-dien-3beta-ol	412.77	42.98	0.76
MOL002140	Perlolyrine	264.3	65.95	0.27
MOL002879	Diop	390.62	43.59	0.39
MOL003036	ZINC03978781	412.77	43.83	0.76
MOL000449	Stigmasterol	412.77	43.83	0.76
MOL003896	7-Methoxy-2-methyl isoflavone	266.31	42.56	0.2
MOL004355	Spinasterol	412.77	42.98	0.76
MOL004492	Chrysanthemaxanthin	584.96	38.72	0.58
MOL005321	Frutinone A	264.24	65.9	0.34
MOL000006	luteolin	286.25	36.16	0.25
MOL006554	Taraxerol	426.8	38.4	0.77
MOL006774	stigmast-7-enol	414.79	37.42	0.75
MOL007059	3-beta-Hydroxymethyllenetanshiquinone	294.32	32.16	0.41
MOL007514	methyl icosa-11,14-dienoate	322.59	39.67	0.23
MOL008391	5alpha-Stigmastan-3,6-dione	428.77	33.12	0.79
MOL008393	7-(beta-Xylosyl)cephalomannine_qt	830.02	38.33	0.29
MOL008397	Daturilin	436.64	50.37	0.77
MOL008400	glycitein	284.28	50.48	0.24
MOL008406	Spinoside A	716.95	39.97	0.4
MOL008407	(8S,9S,10R,13R,14S,17R)-17-[(E,2R,5S)-5-ethyl-6-methylhept-3-en-2-yl]-10,13-dimethyl-1,2,4,7,8,9,11,12,14,15,16,17-dodecahydrocyclopenta[a]phenanthren-3-one	410.75	45.4	0.76
MOL008411	11-Hydroxyrankinidine	356.46	40	0.66

## Sheet: 白术
Atractylodes Macrocephala Koidz		MW	OB	DL
MOL000020	12-senecioyl-2E,8E,10E-atractylentriol	312.39	62.4	0.22
MOL000021	14-acetyl-12-senecioyl-2E,8E,10E-atractylentriol	355.44	60.31	0.31
MOL000022	14-acetyl-12-senecioyl-2E,8Z,10E-atractylentriol	356.45	63.37	0.3
MOL000028	α-Amyrin	426.8	39.51	0.76
MOL000033	(3S,8S,9S,10R,13R,14S,17R)-10,13-dimethyl-17-[(2R,5S)-5-propan-2-yloctan-2-yl]-2,3,4,7,8,9,11,12,14,15,16,17-dodecahydro-1H-cyclopenta[a]phenanthren-3-ol	428.82	36.23	0.78
MOL000049	3β-acetoxyatractylone	274.39	54.07	0.22
MOL000072	8β-ethoxy atractylenolide Ⅲ	276.41	35.95	0.21

## Sheet: 山楂
	Molecule Name	MW	OB	DL
MOL000354	isorhamnetin	316.28	49.6	0.31
MOL000359	sitosterol	414.79	36.91	0.75
MOL000422	kaempferol	286.25	41.88	0.24
MOL000449	Stigmasterol	412.77	43.83	0.76
MOL000073	ent-Epicatechin	290.29	48.96	0.24
MOL000098	quercetin	302.25	46.43	0.28

## Sheet: 虎杖
		MW	OB	DL
MOL013281	6,8-Dihydroxy-7-methoxyxanthone	258.24	35.83	0.21
MOL013287	Physovenine	262.34	106.21	0.19
MOL013288	Picralinal	366.45	58.01	0.75
MOL002268	rhein	284.23	47.07	0.28
MOL002280	Torachrysone-8-O-beta-D-(6'-oxayl)-glucoside	480.46	43.02	0.74
MOL000358	beta-sitosterol	414.79	36.91	0.75
MOL000492	(+)-catechin	290.29	54.83	0.24
MOL000006	luteolin	286.25	36.16	0.25
MOL000098	quercetin	302.25	46.43	0.28

## Sheet: 姜黄
	Molecule Name	MW	OB	DL
MOL000449	Stigmasterol	412.77	43.83	0.76
MOL000493	campesterol	400.76	37.58	0.71
MOL000953	CLR	386.73	37.87	0.68

## Sheet: 决明子
	Molecule Name	MW	OB	DL
MOL002268	rhein	284.23	47.07	0.28
MOL002281	Toralactone	272.27	46.46	0.24
MOL000449	Stigmasterol	412.77	43.83	0.76
MOL000471	aloe-emodin	270.25	83.38	0.24
MOL005043	campest-5-en-3beta-ol	400.76	37.58	0.71
MOL006465	Rubrofusarin-6-beta-gentiobioside	596.59	40.12	0.67
MOL006466	Rubrofusarin	272.27	45.55	0.24
MOL006472	Aurantio-obtusin	330.31	31.55	0.37
MOL006475	Obtusin	344.34	81.43	0.4
MOL006481	gluco-obtusifolin	446.44	42.41	0.81
MOL006482	9,10-dihydroxy-7-methoxy-3-methylene-4H-benzo[g]isochromen-1-one	272.27	63.25	0.24
MOL006486	obtusin	344.34	31.24	0.4
MOL006489	Quinizarin	240.22	47.34	0.19
MOL000953	CLR	386.73	37.87	0.68
