# Supplementary material for: Anti-Autophagy Mechanism of Zhi Gan Prescription Based on Network Pharmacology in Nonalcoholic Steatohepatitis Rats
Source: Front Pharmacol. 2021 Jul 19;12:708479. doi: 10.3389/fphar.2021.708479 (PMC8326404; doi:10.3389/fphar.2021.708479)
Supplement: Supplementary file 1 [file DataSheet1.ZIP › FigShares/FigShares/disease-targets.xlsx]

## Sheet: Sheet1
omim		genecard		DisGeNET				疾病靶点		化合物靶点		共有靶点
RHNR		INS		PNPLA3	ADAMTS13			RHNR		ANXA1		SLC6A8
MDD		TNF		NFE2L2	MAPK14			MDD		AR		BCL2
CASP6		ADIPOQ		PPARA	PPARD			CASP6		AREG		CHRNA4
SLC6A8		MIR122		ADIPOQ	GPBAR1			SLC6A8		ARFGEF2		DHFR
SLC6A20		GPT		CYP2E1	PNPLA3			SLC6A20		ATP1A1		EGFR
IRIDA		MIR10B		LEP	IL6			IRIDA		CD34		IL2
HSAS		NAFLD1		TGFB1	ADH1B			HSAS		CHRM1		LIG4
ETM1		NAFLD2		FGF21	ATM			ETM1		CHRM2		NCOA3
WAS		IL6		GNMT	AHCY			WAS		CHRM3		CFTR
RHNA		LEP		LDLR	CXCL10			RHNA		CHRM4		SHOX2
RHCE		GGT1		FAS	TICAM1			RHCE		CHRM5		SLIT2
CER1		PPARA		NR1H4	MIR34A			CER1		CXCR4		CRLF1
SLC4A1		SLC17A5		PEMT	CXCR3			SLC4A1		DHFR		HTT
BCL2		PPARG		CAT	IL13			BCL2		DOCK4		INS
CMT1A		KRT18		ADH1B	MALAT1			CMT1A		DOCK5		TNF
SLE		RETN		IL1A	ARNT			SLE		ESR1		ADIPOQ
HSAN1A		PNPLA3		ALDH2	FGF19			HSAN1A		ESR2		GPT
PCS		MTTP		SREBF1	RBP4			PCS		FGFR2		IL6
SWS		HFE		GSTT1	FOXO1			SWS		GNA15		LEP
OCA1A		CRP		SIRT1	MPO			OCA1A		GPER1		PPARA
GRBGD		CYP2E1		FOLR2	OR10A4			GRBGD		IFNG		PPARG
CF		UCP2		GSTP1	SIRT3			CF		LEF1		MTTP
MVA1		LEPR		GSTM1	PRKCD			MVA1		LRP2		CRP
SCTS		SREBF1		LAMA1	GTF2H1			SCTS		MAP2K1		CYP2E1
XIGIS		TM6SF2		NR5A2	CXCL10			XIGIS		MED1		SREBF1
FL1		IRS1		CSF2	INTU			FL1		MMP9		SREBF2
NAFLD1		FASN		ACE	MT1B			NAFLD1		NEDD4		NR1H4
BEVI		AHSG		AHCY	MIR223			BEVI		NFKB2		IL1B
CHRNA4		SREBF2		AHR	EHMT1			CHRNA4		NKX3-1		FAS
DHFR		CXCL8		PTEN	DICER1			DHFR		NR3C1		AKT1
TDP1		NR1H4		XBP1	TRIM69			TDP1		NTSR1		SIRT1
MUC3A		ADIPOR2		PPARD	GH1			MUC3A		OPRK1		NR1H3
MUC7		MAPK8		SERPINB2	TGFB1			MUC7		P2RX1		APOA1
ETS1		ALB		PDK4	PNPLA3			ETS1		PDGFB		SERPINE1
ETS2		RBP4		LIF	AFP			ETS2		PGR		CAT
RAF1		TLR4		TM6SF2	SMARCA4			RAF1		PHB		IL10
REL		FGF21		MMP1	GDF2			REL		PTGS1		GCG
ERV1		ADIPOR1		IL4	PPARD			ERV1		PTGS2		NAMPT
ERV3		DDIT3		IL3	SQSTM1			ERV3		SERPINB3		JUN
EGFR		IL1B		ALDH1A1	FBL			EGFR		SHH		HMGCR
GH1		PPARGC1A		TNFRSF1B	H4C15			GH1		SOX9		ATF4
HBD		XBP1		PRKCA	NFE2L2			HBD		SRC		ACACA
IL2		SLC2A4		SCARB1	RBP4			IL2		SRD5A1		PRKAA1
KRAS		MAP3K5		PRKACA	NFE2L2			KRAS		TFAP2C		PRKAB1
SLC1A2		FAS		CYP17A1	CCR2			SLC1A2		TGFB1		TGFB1
LIG3		INSR		VLDLR	HFE			LIG3		TNF		SLC25A13
GHR		DPP4		CYP1A2	LGALS3			GHR		TNFSF11		ESR1
IL18		IRS2		PRF1	CYP2E1			IL18		TOX3		MMP9
VEGFB		IL1A		ABCB4	FOXO1			VEGFB		TRIM24		PCSK9
LIG4		AKT1		F2	CYP2B6			LIG4		TRPA1		STAR
STAM		SIRT1		ALDH1B1	KHDRBS1			STAM		TRPM8		FTO
NCOA3		APOB		KLB	LEP			NCOA3		TRPV3		SOD2
OGG1		NR1H3		ABCC2	IL1A			OGG1		UBR5		ICAM1
CFTR		MLXIPL		JAK2	SOD2			CFTR		VDR		CCL2
SHOX2		CASP3		TRIB3	MAPK8			SHOX2		WNT4		APOE
HPGDS		FGF19		ADH1A	GPX1			HPGDS		WNT5A		NR1H2
HIST1H3A		PON1		CPT1A	GPBAR1			HIST1H3A		2020-03-08		HSPA5
BUB1B		MIR34A		GSTA1	MIR451A			BUB1B		AARS		F2
FANCG		TIMP1		ADH4	PPARA			FANCG		AARS2		ELOVL6
TLR4		RARRES2		RDX	IRAK1			TLR4		ABAT		CYP3A4
USP8		APOA1		NQO1	CD36			USP8		ABCA1		IGF1
ERAS		MIR21		ALDH4A1	LAMA1			ERAS		ABCB1		MTOR
LBR		SERPINE1		B3GAT1	ALDH4A1			LBR		ABCB4		IL1RN
MUC3B		GCKR		IKBKG	ADRA2A			MUC3B		ABCC4		NNMT
SIRT6		CAT		EIF2AK1	HP			SIRT6		ABCC9		ADH1A
STAM2		IL10		PRKCD	CD36			STAM2		ABCG1		CD36
JAM3		GCG		PRKCE	NLRP3			JAM3		ABCG2		BAX
SLIT2		MIR33A		STC2	AEBP1			SLIT2		ABHD5		C3
CRLF1		LIVAR		CD14	PPARGC1B			CRLF1		ACACA		ADRB3
RECQL2		LPL		RAG2	IL1B			RECQL2		ACACB		TP53
SOCS2		NAMPT		ATP5F1B	MT1B			SOCS2		ACADL		HMOX1
ANO6		APOC3		GPT	GPT			ANO6		ACADM		ABCA1
FCGR3B		PTEN		GABPA	GRB2			FCGR3B		ACADSB		XDH
HTT		JUN		TNF	FNDC5			HTT		ACAT1		GHRL
AHDC1		MIR132		SAMM50	TNFRSF6B			AHDC1		ACE		VCP
SIPA1L3		LNCARSR		HFE	CISD2			SIPA1L3		ACHE		STUB1
CLEC14A		HMGCR		MAP3K5	IL17A			CLEC14A		ACMSD		ABCG1
MIER1		MSR1		NLRP3	IL1B			MIER1		ACO2		BMP6
LAPTM4A		NCAN		SLC5A2	ADH1B			LAPTM4A		ACOT4		S100A9
		MIR126		MTTP	APOE			INS		ACP1		FNDC5
		MIR16-1		TLR4	PNPLA3			TNF		ACSL3		CXCR4
		MIR200A		XPR1	LIF			ADIPOQ		ACSL4		CHUK
		MIRLET7D		KRT18	MIR296			MIR122		ACSS1		HSD11B1
		MIR27A		CD36	MIR132			GPT		ACSS2		PRKAG1
		MIR140		GLP1R	CRP			MIR10B		ACTN2		TNFAIP3
		MIR26A1		INTU	VLDLR			NAFLD2		ACTN3		ABCC2
		MIR17		MAPK8	PPARD			IL6		ACY1		GOT1
		MIR200B		MIR122	MLKL			LEP		ACY3		AREG
		MIR200C		IL1B	CEACAM1			GGT1		ADA		NOTCH1
		MIRLET7C		FGF19	PTEN			PPARA		ADAM17		GSTP1
		MIRLET7E		MIR21	SLCO1A2			SLC17A5		ADAM8		MPO
		MIR27B		ADAMTS13	IL6			PPARG		ADAMTS20		AGTR1
		MIR30A		HP	MIR144			KRT18		ADAMTS9		CETP
		MIR31		HMGB1	PF4			RETN		ADAP1		CNR2
		MIR22		SMARCA4	TLR4			PNPLA3		ADAP2		ABCB11
		MIR429		GPBAR1	MIR29A			MTTP		ADCY6		LGALS3
		MIR378A		MIR34A	PNPLA3			HFE		ADH1A		NOX4
		MIR130A		HIF1A	H4C9			CRP		ADH1B		SMAD7
		MIR107		HGF	PRKCA			CYP2E1		ADH1C		CYGB
		MIR203A		IGF1	GABPA			UCP2		ADH4		PLIN5
		MIR183		LGALS3BP	ABCC2			LEPR		ADH7		SPARC
		MIR154		IL6	NQO1			SREBF1		ADI1		CDKN2A
		MIR29C		PPARG	PNPLA3			TM6SF2		ADIPOQ		NOS2
		MIR151A		CXCL10	IFNA13			IRS1		ADIRF		MAOA
		MIR187		LGALS3	GSTM1			FASN		ADK		SLC6A4
		MIR30D		IL17A	DPP4			AHSG		ADNP		AVP
		MIR95		FOXO1	TGFB1			SREBF2		ADORA1		CCL5
		MIR451A		RARRES2	ACACA			CXCL8		ADORA2A		COX6B1
		ATF4		DPP4	JAK2			NR1H4		ADORA2B		PRKCD
		EIF2S1		SOD2	GLP1R			ADIPOR2		ADRA1A		MIF
		MIR33B		CFLAR	NUP62			MAPK8		ADRA1B		CBS
		ACACA		MIR223	HFE			ALB		ADRA1D		PINK1
		RELA		RBP4	PPARA			RBP4		ADRA2A		CNR1
		PRKAA1		AR	PNPLA3			FGF21		ADRA2B		VCAM1
		PRKAB1		ACAT1	MMP9			ADIPOR1		ADRA2C		TLR9
		NDUFS1		LBP	GSTP1			DDIT3		ADRB1		CCL3
		MALAT1		JUN	AEBP1			IL1B		ADRB2		SUCNR1
		MIR181B1		GTF2H1	MIR182			PPARGC1A		ADRB3		ATM
		LEPQTL1		MIR33A	TAZ			XBP1		ADRBK1		CYP17A1
		TGFB1		MAT1A	LEP			SLC2A4		ADSS		CYP2D6
		PTX3		CEACAM1	CFLAR			MAP3K5		ADSSL1		MAPK9
		LGALS3BP		MT1B	HGF			FAS		AFM		CYP2B6
		AKR1A1		CMKLR1	MTDH			INSR		AGRN		HIF1A
		TNFRSF1A		MIR144	UCP2			DPP4		AGT		ITPR2
		MTHFR		IFNA13	TNFRSF1A			IRS2		AGTR1		CYP1A2
		ACTC1		APOB	SCARB1			IL1A		AGTR2		ACACB
		AGER		MIR192	PNPLA3			AKT1		AGTRAP		DMGDH
		SLC25A13		ST3GAL4	PNPLA3			SIRT1		AGXT		SHBG
		PEMT		SQSTM1	MTTP			APOB		AGXT2		ADH1C
		CHIT1		SLC10A2	ESR2			NR1H3		AHCY		PTGS2
		NLRP3		IFNA1	H4C13			MLXIPL		AHCYL1		RIPK1
		TCF7L2		PNPLA2	MC4R			CASP3		AHCYL2		ADRB2
		HGF		CXCL8	AHR			FGF19		AKR1C1		FASLG
		MAT1A		CCL4	CFLAR			PON1		AKR1C2		FOXP3
		VTN		MIR451A	PKM			MIR34A		AKR1C3		ACADM
		SERPINB4		SYK	MIR21			TIMP1		AKR1D1		CACNA2D1
		ESR1		TAZ	TGFB1			RARRES2		ALAD		RDH5
		ATP5F1E		PIN1	PRF1			APOA1		ALAS1		NR1I2
		MMP9		NR0B2	LDLR			MIR21		ALAS2		ACSL1
		PCSK9		TP53	FGF19			SERPINE1		ALDH1A1		NR1I3
		STAR		CCR2	ADAMTS13			GCKR		ALDH1A2		SLC27A2
		FTO		UCP2	IL1B			CAT		ALDH1A3		GPLD1
		HAMP		CASP8	TLR4			IL10		ALDH1B1		CRACR2A
		HSPB1		VTN	IL6ST			GCG		ALDH2		ZP4
		MBOAT7		AEBP1	MTTP			MIR33A		ALDH3A2		GNMT
		TF		NUP62	RORA			LIVAR		ALDH3B1		ADH1B
		SOD2		DECR1	FAS			LPL		ALDH3B2		ALDH2
		ICAM1		SERPINF1	MAPK8			NAMPT		ALDH5A1		LAMA1
		CCL2		AGER	VTN			APOC3		ALDH7A1		CSF2
		CXCL10		FABP4	HIF1A			PTEN		ALDH9A1		ACE
		SOD1		DCTN4	PIK3CG			JUN		ALLC		AHCY
		APOE		PKM	LDLR			MIR132		ALOX15		PPARD
		NR1H2		KHDRBS1	FAT1			LNCARSR		ALOX15B		IL4
		HSPA5		CRP	INTU			HMGCR		ALOX5		ALDH1A1
		BCL2		MPO	GLP1R			MSR1		ALOX5AP		PRKCA
		TTR		GPX1	BHLHE23			NCAN		AMICA1		ABCB4
		GLP1R		MC4R	GPT			MIR126		AMPD3		ALDH1B1
		TFR2		MMP9	INS			MIR16-1		ANAPC2		CPT1A
		MIR192		GPR119	CSF2			MIR200A		ANG		ADH4
		SQSTM1		TLR9	VTN			MIRLET7D		ANGPT1		NQO1
		F2		GGTLC1	SMARCA4			MIR27A		ANK2		EIF2AK1
		GDF15		CD40LG	PNPLA2			MIR140		ANK3		RAG2
		ELOVL6		PON1	XPR1			MIR26A1		ANO9		GPBAR1
		CYP3A4		RETN	PIN1			MIR17		AOC1		AR
		IGF1		CD44	PCSK9			MIR200B		AOC2		ACAT1
		GSR		LGALS14	IL22			MIR200C		AOC3		PNPLA2
		CFLAR		MYOM2	DECR1			MIRLET7C		AP3D1		SYK
		BIRC5		IL20RA	TMBIM6			MIRLET7E		APIP		KHDRBS1
		TXN		PTPN11	CCL4L2			MIR27B		APLN		MC4R
		PPP1R15A		MIR182	PPARA			MIR30A		APLP1		PLG
		MTOR		SETMAR	SREBF1			MIR31		APOA1		PIK3CG
		SERPINA1		CD1D	MIR21			MIR22		APOA2		KLF4
		IL1RN		PLG	HFE			MIR429		APOC2		TLR3
		NNMT		FBXW7	CCL4			MIR378A		APOD		RUNX1
		LOX		PRX	AHCY			MIR130A		APOE		ARID1A
		A2M		KEAP1	GHR			MIR107		APRT		MGAM
		CSF1		PIK3CG	SUV39H2			MIR203A		AQP1		BCAT1
		HP		FBXW5	MIR33A			MIR183		AQP8		SHH
		FABP1		CD40	GABPA			MIR154		ARG1		SHMT1
		LUM		MAPK3	MAPK3			MIR29C		ARG2		SI
		PSG1		PSPH	FOLR2			MIR151A		ARHGEF2		DDC
		CTSD		AKR1B10	PDE4A			MIR187		ARID1A		ESR2
		CCR1		CD38	LITAF			MIR30D		ARRB1		ACSL4
		CPB2		MTDH	CXCL5			MIR95		ARRB2		MLYCD
		TIMP2		GDF15	TNF			MIR451A		ARRDC3		MAPK14
		CXCR5		LITAF	GSTM1			ATF4		ARV1		ADRA2A
		ADH1A		ZC4H2	PNPLA3			EIF2S1		ARX		ATF2
		CCL4		H4C15	MIR34A			MIR33B		ASCL1		COL1A1
		SERPINA12		SLC12A9	PDK4			ACACA		ASNS		PPARGC1B
		DNMT1		AZGP1	CYP1A2			RELA		ASPA		ADORA2A
		CD36		PTPN1	GPR119			PRKAA1		ASPDH		NOX1
		BAX		CCL4L2	LGALS3BP			PRKAB1		ASPH		PDE4A
		C3		JCAD	FOLR2			NDUFS1		ASRGL1		PF4
		CD44		MOCOS	MAP3K11			MALAT1		ASS1		PHB
		ADRB3		AVP	PNPLA3			MIR181B1		ATF1		PIK3CA
		MMP2		SEMA6A	CD1D			LEPQTL1		ATF2		PIK3CB
		TP53		MIR146B	SMAD4			TGFB1		ATF3		ACO1
		HMOX1		PTPA	KRT18			PTX3		ATF4		NPPC
		NFE2L2		KLF4	TRIB3			LGALS3BP		ATF5		PIK3CD
		ABCA1		H4C3	CYP2E1			AKR1A1		ATF6		ANXA1
		PIN1		SUV39H2	JCAD			TNFRSF1A		ATF7		FFAR1
		XDH		CCK	COL1A1			MTHFR		ATM		IL13
		PDK4		CXCR4	FABP4			ACTC1		ATOH1		IFNG
		OLR1		PLA2G6	PPARD			AGER		ATP11C
		RPTOR		STK24	ITPR2			SLC25A13		ATP13A2
		INHBA		TNFRSF4	IL6			PEMT		ATP1A2
		GHRL		TRAF6	LGALS3			CHIT1		ATP2A1
		NR0B2		TNFRSF1A	PPARG			NLRP3		ATP2B4
		CMKLR1		TNFAIP3	LAMA1			TCF7L2		ATP7A
		SLPI		TLR3	TLR9			HGF		ATP8A2
		GSDMD		TLR2	PTPA			MAT1A		ATP8B1
		CCN2		THRB	SYK			VTN		AURKA
		MAP3K7		TGM2	SLC5A2			SERPINB4		AVP
		VCP		HAVCR2	LRPAP1			ESR1		AVPR1A
		CYLD		RUNX1	FGR			ATP5F1E		AVPR2
		TNFRSF11B		GSDMD	TFF3			MMP9		B4GALT1
		ELANE		EHMT1	SIRT6			PCSK9		B4GALT2
		DICER1		CALCR	KLF4			STAR		B4GALT3
		STUB1		H4C8	GPR119			FTO		B4GALT4
		HBB		H4C11	NRF1			HAMP		BAAT
		DKK1		H4C2	MIR122			HSPB1		BAX
		SOST		H4C12	STK11			MBOAT7		BBOX1
		ABCG1		H4C6	SOD2			TF		BCAT1
		BMP6		H4C4	SLC11A2			SOD2		BCAT2
		AOX1		H4C1	CEACAM1			ICAM1		BCHE
		TRIM33		H4C9	SLC5A2			CCL2		BCKDHA
		UBE2D2		ARID1A	IL13RA2			CXCL10		BCKDHB
		EEF1A1		BAS	MIR122			SOD1		BCKDK
		S100A9		H4C5	GPS2			APOE		BCL11B
		DROSHA		H4C13	APOB			NR1H2		BCL2
		HBA1		MADCAM1	GABPA			HSPA5		BCL2L1
		TRIM21		H4C14	LEP			TTR		BCO2
		WWTR1		STAM	FOXO1			GLP1R		BDH1
		DGCR8		PLPP3	BIRC2			TFR2		BDKRB2
		TMSB4X		RUNX3	RASSF1			MIR192		BDNF
		RNF114		SRSF3	ADAMTS13			SQSTM1		BHMT
		PARVB		SFRP5	MIR223			F2		BHMT2
		HERC4		HDAC3	HFE			GDF15		BICD1
		AUP1		ELOVL6	MIR21			ELOVL6		BLM
		UBXN1		SELENOP	PRX			CYP3A4		BMP2
		FNDC5		MGAM	PNPLA2			IGF1		BMP4
		TRIM47		CXCL5	SERPINF1			GSR		BMP5
		MT-ND6		CCL2	TGFB1			CFLAR		BMP6
		MIR144		RORA	NTS			BIRC5		BNIP3
		CXCR4		BCL2A1	GPT			TXN		C1QTNF1
		PCNA		IL33	MOCOS			PPP1R15A		C1QTNF3
		HNF4A		SART1	SI			MTOR		C2CD5
		CHUK		MOK	NR5A2			SERPINA1		C5
		TLR2		RAB5A	LPCAT3			IL1RN		CA2
		HSD11B1		BCAT1	MMP9			NNMT		CA7
		AIFM1		XPO4	CSF2			LOX		CACNA1A
		YWHAZ		SHH	ENHO			A2M		CACNA1B
		PRKAG1		SHMT1	TM6SF2			CSF1		CACNA1C
		TNFAIP3		TFF3	IL18			HP		CACNA1D
		ABCC2		TMBIM6	SRSF3			FABP1		CACNA1F
		TFAP2A		TCF7L2	DCTN4			LUM		CACNA1G
		GOT1		MIR33B	LRPPRC			PSG1		CACNA1H
		ABCC3		IRS2	THRB			CTSD		CACNA1I
		ALPP		STK11	CRP			CCR1		CACNA1S
		CYP2J2		TNFSF10	FGF21			CPB2		CACNA2D1
		AREG		SREBF2	PSPH			TIMP2		CACNA2D2
		RPS27A		TNFRSF6B	MGAM			CXCR5		CACNB1
		RIPK3		TNFRSF10B	HFE			ADH1A		CACNG1
		H6PD		SPP1	TLR2			CCL4		CACNG2
		CD68		SMPD1	PTPN11			SERPINA12		CAD
		AEBP1		SMARCA1	SYK			DNMT1		CALB1
		NOTCH1		SLCO1A2	RAB5A			CD36		CALCA
		SMAD4		SI	STC2			BAX		CALCOCO2
		GSTP1		HAMP	TNFRSF4			C3		CALHM1
		MMP13		DDC	ESR1			CD44		CALM1
		MPO		ELN	SMAD7			ADRB3		CALM2
		AGTR1		SLC51A	LBP			MMP2		CALM3
		MAP3K11		FBL	RUNX1			TP53		CAMK2D
		GPX1		ESR1	MTTP			HMOX1		CAMK2G
		CETP		ESR2	TGM2			NFE2L2		CARTPT
		FST		ACSL4	PNPLA3			ABCA1		CASQ1
		CNR2		FAP	HMGB1			PIN1		CASQ2
		CYBA		FASN	AGTR1			XDH		CAT
		SCARB1		ELANE	XBP1			PDK4		CAV1
		ABCB11		MLKL	PRDX4			OLR1		CAV3
		LGALS3		GADD45A	MIR33A			RPTOR		CBFA2T3
		CXCR3		AFP	TLR4			INHBA		CBS
		LBP		DNMT3B	HMGB1			GHRL		CCBL1
		LATS2		ATN1	CALCR			NR0B2		CCL2
		NOX4		AGTR1	IL4			CMKLR1		CCL3
		SNTA1		E2F1	ADH1A			SLPI		CCL5
		SLC10A1		ABCA1	HGF			GSDMD		CCM2L
		G6PC		EGFR	SIRT1			CCN2		CD300A
		SMAD7		FAT1	FGF21			MAP3K7		CD36
		HS3ST1		FGR	GDF15			VCP		CD47
		IL13RA2		AKR1B1	LGALS14			CYLD		CD63
		BGLAP		TRPC4AP	MIR122			TNFRSF11B		CD74
		CYGB		GCG	SREBF1			ELANE		CDC20
		CCRL2		GCGR	MAP3K5			DICER1		CDC42
		FFAR4		SLC17A5	CD36			STUB1		CDH11
		GRK2		GDF2	PHB			HBB		CDH3
		SAMM50		RNU1-1	NLRP3			DKK1		CDH8
		TMBIM6		GH1	TNFRSF1B			SOST		CDKN2A
		TMBIM1		GHR	CCK			ABCG1		CECR1
		YIPF1		IBTK	GNMT			BMP6		CES1
		PLIN5		WWTR1	MTTP			AOX1		CETN1
		JCAD		DICER1	XPR1			TRIM33		CETN2
		SPARC		SIRT3	IL1RN			UBE2D2		CFTR
		PTPN1		MLYCD	LNCARSR			EEF1A1		CHAT
		CDKN2A		MTOR	PNPLA3			S100A9		CHDH
		NOS2		FNDC5	RAG2			DROSHA		CHGA
		MAOA		PCSK9	ZGLP1			HBA1		CHKA
		PLA2G4A		ZGLP1	HAVCR2			TRIM21		CHRFAM7A
		PLA2G6		HSPA12A	TNFRSF10B			WWTR1		CHRNA1
		CYCS		GIP	GPT			DGCR8		CHRNA10
		SLC6A4		MIR873	CLCN2			TMSB4X		CHRNA2
		PEPD		TNFSF13B	HMGB1			RNF114		CHRNA3
		SHC1		CETP	LUM			PARVB		CHRNA4
		P2RX7		NMU	CTSD			HERC4		CHRNA5
		CPS1		PPARGC1A	TRPC4AP			AUP1		CHRNA6
		AVP		RIPK3	RARRES2			UBXN1		CHRNA7
		TUBA8		ADAMTS5	IRS2			FNDC5		CHRNA9
		MST1		CHIT1	IBTK			TRIM47		CHRNB1
		CD14		RASSF1	LCN2			MT-ND6		CHRNB2
		GCLC		TXNIP	BCAT1			MIR144		CHRNB3
		CCL5		PRDX4	GSTM2			CXCR4		CHRNB4
		FOXO3		LRPPRC	NM			PCNA		CHRND
		ANGPTL3		LPCAT3	ALDH1B1			HNF4A		CHRNE
		TNFRSF4		CDKN1A	SMCP			CHUK		CHRNG
		CCL21		LOC102724197	ALDH2			TLR2		CLN3
		COX6B1		AKR1A1	CYP2E1			HSD11B1		CNR1
		CCL19		TLR6	LOXL2			AIFM1		CNR2
		DEFA1		YAP1	LEP			YWHAZ		CNTF
		PRKCD		NCOA2	GSTA4			PRKAG1		CNTNAP4
		PTPN11		LNCARSR	MIR122			TNFAIP3		COL1A1
		SMARCA4		CLCN2	MIR873			ABCC2		COLGALT1
		CTH		CLU	PRKCE			TFAP2A		COLGALT2
		MYD88		MAPK14	PPARG			GOT1		COLQ
		MIF		SESN3	MIR375			ABCC3		COMT
		CBS		TICAM1	APOB			ALPP		COX1
		KEAP1		ADRA2A	PKM			CYP2J2		COX2
		PINK1		CTSB	CD40			AREG		COX3
		CNR1		CTSD	MAP3K5			RPS27A		COX4I1
		TNFSF10		ADRB3	RARRES2			RIPK3		COX5A
		LIPA		CYP2B6	NOX1			H6PD		COX5B
		ENPP1		TRIM69	MAP3K5			CD68		COX6A2
		AFP		ATF2	GNMT			AEBP1		COX6B1
		VCAM1		H4-16	ELANE			NOTCH1		COX6C
		ULK1		CCR5	NLRP3			SMAD4		COX7A1
		PLIN1		ADH1C	NFE2L2			GSTP1		COX7B
		TLR9		COL1A1	NFE2L2			MMP13		COX7C
		ENPP2		BHLHE23	GSDMD			MPO		COX8A
		SELE		PPARGC1B	ARID1A			AGTR1		CPLX2
		CEBPB		ADORA2A	CPA1			MAP3K11		CPQ
		TLR6		CPA1	PLG			GPX1		CRACR2A
		LITAF		AWAT1	CCL4			CETP		CRAT
		PLIN2		NOX1	BAS			FST		CRH
		CES2		RTL1	CLU			CNR2		CRHR2
		CD163		MIR29A	F2			CYBA		CRLF1
		MAP1LC3B		MIR296	YAP1			SCARB1		CRP
		AQP9		SMAD4	TNFSF13B			ABCB11		CRTAP
		CISD2		SMAD7	HNF4A			LGALS3		CSF2
		NTS		SMCP	ADAMTS5			CXCR3		CTNNB1
		CCL3		MGAT2	HFE			LBP		CTPS1
		TOMM20		MAP3K11	IL1R1			LATS2		CTR9
		SUCNR1		MMP10	DDC			NOX4		CX3CR1
		IBTK		MIR221	ADH4			SNTA1		CXCL13
		ESM1		CYBB	CAT			SLC10A1		CYGB
		LCN1		CCL4L1	IFNA1			G6PC		CYP11A1
		TXNIP		LCN2	LIF			SMAD7		CYP17A1
		XPO4		LIPA	RNU1-1			HS3ST1		CYP19A1
		LPCAT3		LOXL2	KLB			IL13RA2		CYP1A1
		MRTFA		LRPAP1	FAP			BGLAP		CYP1A2
		STAT1		ARNT	MAP3K5			CYGB		CYP24A1
		ATM		LUM	HFE			CCRL2		CYP27A1
		STAT3		MIR132	TLR4			FFAR4		CYP27B1
		EGF		MTHFR	AVP			GRK2		CYP2B6
		DNMT3A		MUC1	XPO4			SAMM50		CYP2D6
		PRKCQ		MYD88	PPARA			TMBIM6		CYP2E1
		CDKN1A		OLR1	ADIPOQ			TMBIM1		CYP2R1
		TGM2		IL22	NFE2L2			YIPF1		CYP39A1
		CYP17A1		PDE4A	GLP1R			PLIN5		CYP3A4
		CYP2C8		SIRT6	KRT18			JCAD		CYP4B1
		CYP2C9		PF4	TNF			SPARC		CYSLTR1
		CYP2D6		PHB	ACE			PTPN1		DAB2IP
		CPT2		PIK3CA	PPARA			CDKN2A		DARS
		CD40		PIK3CB	JUN			NOS2		DARS2
		MAPK9		MIR375	AGER			MAOA		DBH
		SMAD3		CISD2	NPPC			PLA2G4A		DBT
		CYP2B6		ATM	MUC1			PLA2G6		DCT
		HIF1A		ACO1	ADH1C			CYCS		DDC
		CD40LG		NM	JUN			SLC6A4		DECR2
		CYP2C19		NNMT	CXCR4			PEPD		DEFB126
		CYP2A6		NPPC	NR1H4			SHC1		DGKA
		HDAC8		SLC11A2	MC4R			P2RX7		DGKI
		KRT8		NRF1	PNPLA3			CPS1		DGUOK
		ITPR2		NTS	TNF			AVP		DHODH
		PKM		PIK3CD	GCGR			TUBA8		DHRS3
		IL6ST		OR10A4	GRN			MST1		DHRS4
		CYP1A2		HCFC1	TLR4			CD14		DHRS9
		EIF2AK2		ANXA6	H4C2			GCLC		DHTKD1
		ACACB		ACACA	GGTLC1			CCL5		DKK3
		ERN1		HMGCR	CD44			FOXO3		DLD
		FDFT1		FOXA3	GABPA			ANGPTL3		DLG4
		LCN2		HNF4A	PON1			TNFRSF4		DLL1
		DMGDH		BIRC2	AR			CCL21		DLST
		SHBG		HSPA5	HGF			COX6B1		DMGDH
		GSTM1		ANXA1	SMARCA4			CCL19		DMTN
		DNASE1		NPC1L1	PNPLA3			DEFA1		DNAJA1
		ADH1C		CXCR3	CYBB			PRKCD		DNAJA3
		CDKN3		SLC25A47	GABPA			PTPN11		DNAJC3
		JAZF1		FFAR1	SERPINF1			SMARCA4		DNM3
		ONECUT2		GPS2	MAPK8			CTH		DPEP1
		IFNL4		GRB2	GTF2H1			MYD88		DPPA3
		MIR9-1		GRN	ST3GAL4			MIF		DPYS
		MET		GSTA4	PNPLA3			CBS		DRD1
		MYC		GSTM2	RUNX3			KEAP1		DRD2
		FGFR4		TNC	PRKACA			PINK1		DRD3
		MERTK		IDH2	PPARA			CNR1		DRD4
		VIM		IFNB1	MMP1			TNFSF10		DRD5
		CDH2		IL18	ANXA1			LIPA		EDA
		PTGS2		INS	NFE2L2			ENPP1		EDN1
		TFRC		INSR	ATF2			AFP		EDN2
		RIPK1		IRAK1	ADIPOQ			VCAM1		EEA1
		ADRB2		IRF7	GSTT1			ULK1		EGFR
		ACTN1		ITGAX	PNPLA3			PLIN1		EGLN1
		LIG4		ITPR2	MMP1			TLR9		EGLN2
		CP		ENHO	NR5A2			ENPP2		EGLN3
		FASLG		IL13RA2	SEMA6A			SELE		EIF2AK1
		PRDX5		IL13	SLC17A5			CEBPB		ELOVL4
		HCFC1		IFNG	CD40LG			TLR6		ENOPH1
		GNAO1		ARSH	SREBF1			LITAF		ENPP6
		MMP10		APOE	HFE			PLIN2		EPHA4
		FOXP3		IL1R1	AWAT1			CES2		EPHB1
		ACADM		IL1RN	HCFC1			CD163		EPO
		MBL2		IL6ST	IL10			MAP1LC3B		ESRRG
		SLC27A4		CXCR2	PNPLA3			AQP9		ETFDH
		MMP11		IL10	ADIPOQ			CISD2		ETHE1
		BLVRA		MALAT1	ATP5F1B			NTS		EZR
		CACNA2D1			H4C12			CCL3		F12
		RDH5			PPARA			TOMM20		F2
		NR1I2			MOK			SUCNR1		FABP2
		ACSL1			MPO			IBTK		FABP3
		ACOX1			SELENOP			ESM1		FABP6
		NR1I3			FABP4			LCN1		FADD
		IGFBP1			SART1			TXNIP		FADS1
		SLC27A2			UCP2			XPO4		FADS2
		TJP1			GSTP1			LPCAT3		FAH
		HMGB1			MAT1A			MRTFA		FARS2
		EGR1			NFE2L2			STAT1		FARSA
		E2F1			CMKLR1			ATM		FARSB
		FOSL1			BCL2A1			STAT3		FAS
		LOXL2			XPR1			EGF		FASLG
		LTF			IKBKG			DNMT3A		FBP1
		SLC27A5			GPX1			PRKCQ		FBXO45
		PANX1			CXCR2			CDKN1A		FCER2
		ABCB7			PEMT			TGM2		FECH
		TBX20			MTHFR			CYP17A1		FER
		PALLD			ACAT1			CYP2C8		FFAR1
		HEY1			PNPLA3			CYP2C9		FGF1
		BBC3			XBP1			CYP2D6		FGF10
		COL13A1			FOXA3			CPT2		FGF23
		GPLD1			CDKN1A			CD40		FKBP1A
		LTBP3			ADIPOQ			MAPK9		FKBP1B
		CXCL16			PPARG			SMAD3		FLOT1
		OSTF1			FFAR1			CYP2B6		FLT3
		SH3BP5			NFE2L2			HIF1A		FNDC5
		ST8SIA1			H4C4			CD40LG		FNTA
		ALMS1			PEMT			CYP2C19		FOS
		SFRP5			INTU			CYP2A6		FOXL2
		PZP			IRF7			HDAC8		FOXP3
		PRPH2			HSPA12A			KRT8		FSCN1
		CHST2			SETMAR			ITPR2		FURIN
		FARP1			SLC12A9			PKM		FXYD1
		PHF2			KEAP1			IL6ST		G6PD
		SLC9A9			MMP10			CYP1A2		GAA
		CELF5			CD14			EIF2AK2		GABBR1
		MACROD2			IFNG			ACACB		GABBR2
		SLC46A3			H4C3			ERN1		GABRA1
		ZNF267			SREBF2			FDFT1		GABRA2
		GSTT1			CXCL8			LCN2		GABRA3
		JRKL			AGER			DMGDH		GABRA4
		EHBP1L1			H4C5			SHBG		GABRA5
		DDX60L			HIF1A			GSTM1		GABRA6
		SEL1L3			ADORA2A			DNASE1		GABRB1
		CRACR2A			NR0B2			ADH1C		GABRB2
		ZP4			SLC51A			CDKN3		GABRB3
		TEX36			SLC5A2			JAZF1		GABRD
		ERVK-6			IFNA1			ONECUT2		GABRE
		TLCD4-RWDD3			TNF			IFNL4		GABRG1
		LOC643339			LIPA			MIR9-1		GABRG2
		RNU6-53P			CFLAR			MET		GABRG3
		RPL41P5			GABPA			MYC		GABRP
		LOC101928118			LDLR			FGFR4		GABRQ
		LINC01684			SQSTM1			MERTK		GAL3ST1
		CKS1BP2			MYOM2			VIM		GALC
		MTCO2P1			SLC5A2			CDH2		GAMT
		MAPRE1P1			DCTN4			PTGS2		GARS
		ASS1P8			FGF19			TFRC		GAS6
		RPS27P18			TLR4			RIPK1		GATA3
		FAM8A6P			ZC4H2			ADRB2		GATM
		RPS9P3			TNF			ACTN1		GBA
		RPL29P8			MIR34A			CP		GBA2
		VN2R20P			SLC5A2			FASLG		GC
					TNF			PRDX5		GCAT
					STAM			HCFC1		GCSH
					MAP3K5			GNAO1		GDPGP1
					CCR2			MMP10		GFI1
					TXNIP			FOXP3		GHRH
					TP53			ACADM		GHRL
					TNF			MBL2		GJA5
					FAS			SLC27A4		GLDC
					SAMM50			MMP11		GLI3
					LDLR			BLVRA		GLRA1
					CYP2E1			CACNA2D1		GLRA2
					E2F1			RDH5		GLRA3
					ABCB4			NR1I2		GLRA4
					MADCAM1			ACSL1		GLRB
					KHDRBS1			ACOX1		GLUD1
					ACAT1			NR1I3		GLUD2
					XPR1			IGFBP1		GLUL
					ADRB3			SLC27A2		GLYAT
					EIF2AK1			TJP1		GLYATL1
					ST3GAL4			HMGB1		GLYATL2
					LBP			EGR1		GLYR1
					LGALS3BP			E2F1		GNAS
					IDH2			FOSL1		GNAT1
					H4-16			LOXL2		GNAT3
					LOC102724197			LTF		GNE
					INSR			SLC27A5		GNMT
					PEMT			PANX1		GNPAT
					ADIPOQ			ABCB7		GOT1
					TNC			TBX20		GOT2
					PNPLA3			PALLD		GP9
					CETP			HEY1		GPBAR1
					RARRES2			BBC3		GPD1L
					NFE2L2			COL13A1		GPLD1
					NNMT			GPLD1		GPR101
					FBXW5			LTBP3		GPR143
					HP			CXCL16		GPR18
					PIK3CA			OSTF1		GPR27
					MIR192			SH3BP5		GPT
					CMKLR1			ST8SIA1		GPT2
					SLC25A47			ALMS1		GPX7
					ANXA6			SFRP5		GRIA1
					MIR221			PZP		GRIA2
					HAMP			PRPH2		GRIA3
					NLRP3			CHST2		GRIA4
					NR1H4			FARP1		GRIN1
					XPR1			PHF2		GRIN2A
					IL4			SLC9A9		GRIN2B
					DPP4			CELF5		GRIN2C
					CAT			MACROD2		GRIN2D
					FBXW7			SLC46A3		GRIN3A
					MAP3K5			ZNF267		GRIN3B
					FGF19			GSTT1		GRM7
					PLPP3			JRKL		GSK3A
					ACE			EHBP1L1		GSS
					GPT			DDX60L		GSTP1
					MGAT2			SEL1L3		GSTZ1
					TNF			CRACR2A		GUCY1B3
					RDX			ZP4		HAAO
					ITGAX			TEX36		HACL1
					AHR			ERVK-6		HAL
					GPT			TLCD4-RWDD3		HAND2
					LGALS3			LOC643339		HAP1
					MTOR			RNU6-53P		HARS
					PIN1			RPL41P5		HARS2
					SLC5A2			LOC101928118		HCAR2
					GNMT			LINC01684		HCAR3
					SERPINB2			CKS1BP2		HCN2
					DECR1			MTCO2P1		HCN4
					IL3			MAPRE1P1		HCRT
					H4C1			ASS1P8		HDAC1
					CYP2E1			RPS27P18		HDAC2
					NFE2L2			FAM8A6P		HDAC9
					PPARA			RPS9P3		HDC
					OLR1			RPL29P8		HEG1
					GLP1R			VN2R20P		HELB
					HIF1A			GNMT		HGD
					SHH			LDLR		HIBADH
					MAPK8			ADH1B		HIF1A
					PPARA			ALDH2		HIF1AN
					CASP8			FOLR2		HIPK2
					B3GAT1			LAMA1		HMGA2
					ELN			NR5A2		HMGCR
					ARSH			CSF2		HMOX1
					TP53			ACE		HOMER1
					CD38			AHCY		HPD
					TLR3			AHR		HPN
					IFNA13			PPARD		HPRT1
					TNFSF10			SERPINB2		HPS4
					LEP			LIF		HPX
					ADIPOQ			MMP1		HRC
					PLA2G6			IL4		HRH1
					CPT1A			IL3		HRH2
					TLR6			ALDH1A1		HRH3
					RIPK3			TNFRSF1B		HRH4
					RETN			PRKCA		HSD17B1
					CXCL10			PRKACA		HSD17B11
					CASP8			VLDLR		HSD17B2
					MAT1A			PRF1		HSD17B6
					GSTA1			ABCB4		HSD17B8
					ACO1			ALDH1B1		HSH2D
					NR0B2			KLB		HSP90AA1
					TNF			JAK2		HSP90AB1
					CCL4L1			TRIB3		HSPA1A
					HDAC3			CPT1A		HSPA1B
					MIR192			GSTA1		HSPA8
					PPARD			ADH4		HTR1A
					HMGCR			RDX		HTR1B
					MLYCD			NQO1		HTR1D
					MIR146B			ALDH4A1		HTR1E
					GABPA			B3GAT1		HTR1F
					NPC1L1			IKBKG		HTR2A
					ALDH2			EIF2AK1		HTR2B
					DNMT3B			PRKCE		HTR2C
					MYD88			STC2		HTR3A
					HFE			RAG2		HTR3B
					GPT			ATP5F1B		HTR3C
					AKR1A1			GABPA		HTR3D
					TNF			SLC5A2		HTR3E
					ACSL4			XPR1		HTR5A
					ADIPOQ			INTU		HTR6
					FGF21			ADAMTS13		HTR7
					NLRP3			GPBAR1		HTT
					IL1A			IL17A		IARS
					NLRP3			FOXO1		IARS2
					GABPA			MIR223		ICAM1
					NMU			AR		IDNK
					GIP			ACAT1		IDO1
					HP			GTF2H1		IFI6
					ALDH1A1			CEACAM1		IGF1
					MIR33B			MT1B		IGF2
					MTTP			IFNA13		IKBKB
					SHMT1			ST3GAL4		IL10
					GPT			SLC10A2		IL13
					IL1B			IFNA1		IL1B
					ELOVL6			PNPLA2		IL1RN
					EGFR			SYK		IL2
					SLC10A2			TAZ		IL4
					H4C8			CCR2		IL5
					NUP62			CASP8		IL6
					TRAF6			NUP62		ILVBL
					CYP2E1			DECR1		INS
					HSPA5			SERPINF1		INSM1
					SMPD1			FABP4		IRX5
					KRT18			DCTN4		ITFG2
					MTTP			KHDRBS1		ITGAV
					TCF7L2			MC4R		ITGB3
					AZGP1			GPR119		ITPR1
					CHIT1			GGTLC1		ITPR2
					SLC10A2			LGALS14		ITPR3
					NFE2L2			MYOM2		IYD
					FGF21			IL20RA		JDP2
					PIK3CD			MIR182		JMJD6
					GPT			SETMAR		JUN
					GADD45A			CD1D		JUP
					NCOA2			PLG		KANK2
					WWTR1			FBXW7		KARS
					TAZ			PRX		KCNA1
					SIRT1			PIK3CG		KCNA10
					LDLR			FBXW5		KCNA2
					ADIPOQ			MAPK3		KCNA3
					CD36			PSPH		KCNA4
					PNPLA3			AKR1B10		KCNA5
					GSTT1			CD38		KCNA6
					STK24			MTDH		KCNA7
					PTPN1			ZC4H2		KCNB1
					IGF1			H4C15		KCNB2
					ABCA1			SLC12A9		KCNC1
					H4C6			AZGP1		KCNC2
					GCG			CCL4L2		KCNC3
					GABPA			MOCOS		KCND1
					PDK4			SEMA6A		KCND2
					IGF1			MIR146B		KCND3
					CCR5			PTPA		KCNE1
					DPP4			KLF4		KCNE2
					H4C11			H4C3		KCNE5
					CXCL8			SUV39H2		KCNH2
					IL20RA			CCK		KCNH6
					MIR451A			STK24		KCNH7
					IL3			TRAF6		KCNIP2
					NLRP3			TLR3		KCNJ1
					AR			THRB		KCNJ10
					SERPINB2			HAVCR2		KCNJ11
					INTU			RUNX1		KCNJ3
					IL17A			EHMT1		KCNJ5
					KRT18			CALCR		KCNJ6
					TGFB1			H4C8		KCNJ8
					CCL2			H4C11		KCNJ9
					MAP3K5			H4C2		KCNK1
					GPT			H4C12		KCNK4
					LGALS3BP			H4C6		KCNK6
					IL17A			H4C4		KCNMA1
					SPP1			H4C1		KCNMB1
					FGF21			H4C9		KCNMB2
					NR1H4			ARID1A		KCNMB3
					PPARA			BAS		KCNMB4
					IFNB1			H4C5		KCNN1
					IGF1			H4C13		KCNN2
					SMARCA1			MADCAM1		KCNN3
					H4C14			H4C14		KCNN4
					SFRP5			PLPP3		KCNQ1
					PTEN			RUNX3		KHDRBS1
					CD36			SRSF3		KIF14
					KRT18			HDAC3		KISS1
					GPBAR1			SELENOP		KIT
					PNPLA3			MGAM		KITLG
					AKR1B10			CXCL5		KL
					CTSB			RORA		KLF4
					FASN			BCL2A1		KLF5
					TNFAIP3			IL33		KLHL3
					ADIPOQ			SART1		KMO
					RTL1			MOK		KMT2A
					ATN1			RAB5A		KYNU
					PPARGC1A			BCAT1		LAMP2
					TM6SF2			SHH		LANCL2
					MIR144			SHMT1		LARS
					FAS			TFF3		LARS2
					AKR1B1			STK11		LCMT1
					SESN3			TNFRSF6B		LCMT2
					PNPLA3			TNFRSF10B		LEP
					IL33			SPP1		LGALS3
					GABPA			SMPD1		LHCGR
					CYP17A1			SMARCA1		LIG4
					SOD2			SLCO1A2		LILRB1
					PIK3CB			SI		LONP1
								DDC		LPCAT1
								ELN		LPCAT2
								SLC51A		LPCAT4
								FBL		LRAT
								ESR2		LRRC47
								ACSL4		LRRC4B
								FAP		LRRC8A
								MLKL		LRRK2
								GADD45A		LTA
								DNMT3B		LYZ
								ATN1		MAD2L2
								FAT1		MAGI2
								FGR		MAOA
								AKR1B1		MAOB
								TRPC4AP		MAP2K5
								GCGR		MAPK8IP3
								GDF2		MAPK9
								RNU1-1		MAS1
								SIRT3		MBD1
								MLYCD		MC4R
								ZGLP1		MCCC1
								HSPA12A		MCCC2
								GIP		MCL1
								MIR873		MCM3
								TNFSF13B		MECOM
								NMU		MECR
								ADAMTS5		MEF2C
								RASSF1		METAP2
								PRDX4		METRNL
								LRPPRC		MIF
								LOC102724197		MIP
								YAP1		MLYCD
								NCOA2		MMP28
								CLCN2		MRI1
								CLU		MRPS36
								MAPK14		MSN
								SESN3		MSTN
								TICAM1		MTAP
								ADRA2A		MTNR1B
								CTSB		MTOR
								TRIM69		MTR
								ATF2		MTRR
								H4-16		MUC2
								CCR5		MYF5
								COL1A1		MYF6
								BHLHE23		MYO5A
								PPARGC1B		MYOD1
								ADORA2A		MYOG
								CPA1		MZB1
								AWAT1		NACA
								NOX1		NAGK
								RTL1		NAGLU
								MIR29A		NAGPA
								MIR296		NAMPT
								SMCP		NAPEPLD
								MGAT2		NAPRT
								MIR221		NARS
								CYBB		NARS2
								CCL4L1		NAV2
								LRPAP1		NCBP2
								ARNT		NCKAP1L
								MUC1		NCOA1
								IL22		NCOA3
								PDE4A		NDOR1
								PF4		NDRG2
								PHB		NEDD4L
								PIK3CA		NEFH
								PIK3CB		NEFL
								MIR375		NEUROD2
								ACO1		NF2
								NM		NFATC1
								NPPC		NFIB
								SLC11A2		NFKB1
								NRF1		NFS1
								PIK3CD		NFX1
								OR10A4		NGF
								ANXA6		NGFR
								FOXA3		NKX2-1
								BIRC2		NLGN1
								ANXA1		NMI
								NPC1L1		NMUR2
								SLC25A47		NNMT
								FFAR1		NOD2
								GPS2		NOS1
								GRB2		NOS1AP
								GRN		NOS2
								GSTA4		NOS3
								GSTM2		NOX1
								TNC		NPPA
								IDH2		NPR1
								IFNB1		NPR2
								IRAK1		NPR3
								IRF7		NPY5R
								ITGAX		NR1D1
								ENHO		NR1H2
								IL13		NR1H3
								IFNG		NR1H4
								ARSH		NR1I2
								IL1R1		NR3C2
								CXCR2		NR4A3
										NRG1
										NRP1
										NRXN1
										NRXN2
										NRXN3
										NT5C1A
										NT5E
										NUDT12
										NUDT9
										OAT
										OAZ1
										OAZ2
										OAZ3
										OCA2
										OGDH
										OGDHL
										OGFOD1
										OPRD1
										OPRM1
										ORMDL1
										ORMDL2
										OSBPL8
										OTC
										OXCT1
										OXCT2
										OXER1
										OXT
										OXTR
										P2RX2
										P2RX3
										P2RY1
										P3H1
										P3H2
										P3H3
										P4HA1
										P4HA2
										P4HA3
										P4HB
										PAH
										PAICS
										PARK2
										PARP10
										PAWR
										PAX2
										PAX7
										PAXBP1
										PC
										PCBD1
										PCBD2
										PCCA
										PCCB
										PCK1
										PCSK6
										PCSK9
										PCYT1A
										PCYT1B
										PDE10A
										PDE11A
										PDE1A
										PDE1B
										PDE1C
										PDE2A
										PDE3A
										PDE3B
										PDE4A
										PDE4B
										PDE4C
										PDE4D
										PDE5A
										PDE6A
										PDE6B
										PDE6C
										PDE7A
										PDE7B
										PDE8A
										PDE8B
										PDE9A
										PDGFA
										PDXP
										PECR
										PF4
										PGD
										PGGT1B
										PGLS
										PHGDH
										PHKG2
										PHOSPHO1
										PHYKPL
										PID1
										PIK3AP1
										PIK3CA
										PIK3CB
										PIK3CD
										PIK3CG
										PIK3R1
										PIK3R5
										PIK3R6
										PINK1
										PIPOX
										PKD2
										PKP2
										PKP3
										PLA2G1B
										PLAT
										PLCB1
										PLCG2
										PLD1
										PLD2
										PLD3
										PLD4
										PLG
										PLN
										PLOD1
										PLOD2
										PLOD3
										PML
										PNLIPRP2
										PNMT
										PNP
										PNPLA2
										PODXL
										POLA1
										POLA2
										POLB
										POR
										POU1F1
										POU4F3
										PPARA
										PPARD
										PPARG
										PPAT
										PPP2CA
										PPP2CB
										PPP2R1A
										PPP3CA
										PPP3CB
										PPP3R1
										PRDM16
										PRDM8
										PRG3
										PRKAA1
										PRKAA2
										PRKAB1
										PRKCA
										PRKCB
										PRKCD
										PRKCG
										PRKDC
										PROC
										PROS1
										PRPH
										PRSS12
										PTGER1
										PTGER2
										PTGER3
										PTGER4
										PTGIS
										PTK2
										PTK2B
										PTPN2
										PYGB
										PYGL
										PYGM
										QDPR
										QPRT
										RAB11FIP1
										RAB11FIP3
										RAB11FIP5
										RAB3A
										RAB3B
										RAB7A
										RAB8B
										RAD51
										RAG1
										RAG2
										RAP1GAP
										RAPGEF2
										RBP1
										RBP3
										RDH11
										RDH12
										RDH13
										RDH14
										RDH5
										RDH8
										REN
										RENBP
										REST
										RET
										RETSAT
										RFK
										RGCC
										RGS2
										RINT1
										RIPK1
										RLBP1
										RNASE1
										RNASE2
										RNASE3
										RNASE4
										RNASE8
										RNF207
										ROCK1
										ROCK2
										RPS6KB1
										RSAD2
										RTN2
										RUNX1
										RXFP4
										RXRA
										RYR1
										RYR2
										RYR3
										S100A8
										S100A9
										S100G
										SALL1
										SAMD9L
										SAXO1
										SCGB1A1
										SCN10A
										SCN11A
										SCN1A
										SCN1B
										SCN2A
										SCN2B
										SCN3A
										SCN3B
										SCN4A
										SCN4B
										SCN5A
										SCN7A
										SCN8A
										SCN9A
										SCNN1A
										SCNN1B
										SCNN1D
										SCNN1G
										SCRIB
										SCT
										SDC4
										SDCBP
										SDHA
										SDHAF2
										SDHB
										SDHC
										SDHD
										SEC14L2
										SEC14L3
										SEC14L4
										SEC14L6
										SEC24B
										SEC61B
										SELP
										SEMA4D
										SERPINB7
										SERPINE1
										SERPINE2
										SERPINF2
										SFXN5
										SGK1
										SHANK3
										SHMT1
										SHMT2
										SHOX2
										SIRT1
										SIRT2
										SIX1
										SIX3
										SIX4
										SLC13A1
										SLC13A2
										SLC13A3
										SLC13A4
										SLC13A5
										SLC17A7
										SLC18A2
										SLC18A3
										SLC1A1
										SLC1A3
										SLC1A4
										SLC1A5
										SLC1A6
										SLC22A1
										SLC25A1
										SLC25A10
										SLC25A12
										SLC25A13
										SLC25A15
										SLC25A2
										SLC26A3
										SLC26A6
										SLC28A3
										SLC29A1
										SLC29A2
										SLC2A1
										SLC32A1
										SLC34A1
										SLC36A1
										SLC38A3
										SLC38A7
										SLC44A4
										SLC4A7
										SLC52A2
										SLC5A7
										SLC6A2
										SLC6A3
										SLC6A4
										SLC6A5
										SLC6A9
										SLC7A1
										SLC7A2
										SLC7A3
										SLC7A4
										SLC7A8
										SLC8A1
										SLC9A3R1
										SLC9A6
										SLIT2
										SLITRK6
										SMAD7
										SMO
										SNAI1
										SNAI2
										SNCA
										SNTG2
										SNW1
										SNX3
										SOCS1
										SORCS3
										SOX15
										SPAG9
										SPARC
										SPI1
										SPIDR
										SPR
										SPX
										SQRDL
										SRD5A2
										SRD5A3
										SREBF1
										SRPK2
										STAP1
										STAR
										STAT5A
										STIM1
										STIM2
										STUB1
										STX1A
										STX3
										SUCLA2
										SUCLG1
										SUCLG2
										SUCNR1
										SUGCT
										SULT1A1
										SULT1A2
										SULT1E1
										SULT2A1
										SULT2B1
										SUMO1
										SUOX
										SYK
										SYT2
										TAAR1
										TAC1
										TAC4
										TACR2
										TAL1
										TALDO1
										TAS1R1
										TAS1R2
										TAS1R3
										TAT
										TBR1
										TCAF1
										TCAF2
										TCF3
										TET1
										TGFB2
										TH
										THBD
										TIRAP
										TKT
										TLR3
										TLR7
										TLR8
										TLR9
										TMEM110
										TMLHE
										TNFAIP3
										TNNC1
										TNR
										TOP1
										TP53
										TPM1
										TPO
										TRAF2
										TREM1
										TRIB1
										TRIM28
										TRPV1
										TST
										TTPA
										TYMP
										TYR
										TYRP1
										UBE2B
										UCHL1
										UCN2
										UGCG
										UGT1A1
										UGT8
										UNC93B1
										UNCX
										UROD
										UROS
										UTS2
										UTS2R
										VARS
										VCAM1
										VCP
										VDAC1
										VDAC2
										VDAC3
										VIMP
										VTI1A
										WARS
										WARS2
										WNK4
										WNT10B
										WNT11
										WNT2
										WNT2B
										XCL1
										XDH
										XRCC4
										XRCC6BP1
										YARS
										YARS2
										YBX3
										YWHAE
										ZEB2
										ZFP42
										ZFPM1
										ZNF219
										ZP3
										ZP4
										ZPR1
										ABCC8
										CACNB2
										CACNB3
										CACNB4
										CALY
										CBR1
										CDK5RAP3
										CHUK
										COL27A1
										CRYZ
										CSNK2A1
										CYP11B1
										CYP11B2
										CYP4F11
										CYP4F2
										CYR61
										EDNRA
										FGF2
										FGF4
										FOXA1
										FPGS
										GATA4
										GCG
										GDF5
										GGH
										HNRNPK
										HSPA5
										IHH
										KAT2A
										KAT2B
										KRT7
										LCT
										MAPK14
										MATN1
										MEX3C
										MPL
										MPO
										MTTP
										NCOR1
										NFKBIA
										NOTCH1
										NPPC
										NQO1
										NQO2
										NR0B1
										PLA2G2E
										PPARGC1B
										PRKAB2
										PRKAG1
										PRKAG2
										PRKAG3
										PRLR
										PSME3
										RARA
										RARB
										RARG
										RFWD3
										RPS6KA3
										RXRB
										RXRG
										SERPINH1
										SLC2A2
										SOAT1
										SOAT2
										SREBF2
										SUPT20H
										TBC1D32
										TOP2A
										TOP2B
										TYMS
										UBIAD1
										VKORC1
										VKORC1L1
										WDR5
										WDR77
										ZNF536
										HSD11B1
										HSD17B3
										PTGFR
										AKAP13
										APP
										ATP1A3
										COL4A1
										COL5A1
										CREBRF
										EIF2D
										ENO1
										GNB2L1
										GRIK1
										GRIK2
										GRIK3
										GRIK4
										GRIK5
										HAND1
										KCNJ12
										KCNJ14
										KCNJ15
										LAMA1
										LAMB1
										NOTCH2
										NR1I3
										PRIMA1
										SHBG
										TSPO
										ABCB11
										ABCC2
										ABCF1
										ABHD6
										ABL1
										ABL2
										ACO1
										ACSL1
										ACVR1
										ACVR1B
										ACVRL1
										ADCY1
										ADORA3
										ADRBK2
										ADSL
										AFG3L2
										AIP
										AKT1
										ALDH3A1
										ALDH8A1
										ALK
										ALKBH2
										ALKBH3
										AMDHD1
										AMHR2
										AMY2A
										ANXA13
										ANXA7
										APAF1
										APOH
										ARAF
										ASIC1
										ASIC2
										ASIC3
										ASL
										ASNA1
										ATP8A1
										AZIN2
										C14orf169
										C2orf83
										C3
										CAPN3
										CCR7
										CDK15
										CETP
										CKB
										CKM
										CKMT1A
										CKMT1B
										CKMT2
										CNST
										CPT1A
										DAGLA
										ELOVL1
										ELOVL2
										ELOVL3
										ELOVL5
										ELOVL6
										ELOVL7
										FADS3
										FCER1A
										FCER1G
										FMR1
										FTCD
										FTO
										GBA3
										GJD4
										GLO1
										GNAT2
										GPR55
										GPRC5A
										HAO1
										HLCS
										HNMT
										HOPX
										JAK3
										JUNB
										KCNQ2
										KCNQ3
										KDM1A
										KDM1B
										KDM5B
										KDM5C
										KDM5D
										LARP4B
										LRTOMT
										MAP4K4
										MAPK1
										MAPK7
										MC3R
										MGAM
										MGLL
										MOXD1
										MS4A2
										MTHFD1L
										MTHFS
										MYL2
										NAE1
										NARFL
										NLRP11
										NODAL
										NOX4
										NT5C2
										NUFIP2
										OGFOD2
										OPN3
										OPN4
										P2RY12
										P4HTM
										PAM
										PDX1
										PEX13
										PGLYRP2
										PHYH
										PIK3R2
										PIK3R3
										PKD1L3
										PKD2L1
										PLA2G2A
										PLA2R1
										PLIN5
										PTGDR2
										PTGIR
										PTGR2
										RAPGEF3
										RARRES1
										RDH16
										RGN
										RPL7A
										S1PR5
										SC5D
										SCD
										SCD5
										SDS
										SDSL
										SI
										SLC12A1
										SLC12A2
										SLC12A4
										SLC12A5
										SLC12A6
										SLC12A7
										SLC16A12
										SLC18A1
										SLC19A2
										SLC19A3
										SLC23A1
										SLC23A2
										SLC25A17
										SLC25A4
										SLC27A2
										SLC35G1
										SLC3A2
										SLC5A6
										SLC6A8
										SLC7A11
										SLC8A2
										SLC8A3
										SLC8B1
										SLC9A1
										SOD2
										SP1
										SP3
										SRI
										SRR
										SYT1
										TIGAR
										TNK2
										TPH1
										TREH
										TRH
										TRPV2
										TRPV4
										UROC1
										WNT7B
