# Supplementary material for: Anti-Autophagy Mechanism of Zhi Gan Prescription Based on Network Pharmacology in Nonalcoholic Steatohepatitis Rats
Source: Front Pharmacol. 2021 Jul 19;12:708479. doi: 10.3389/fphar.2021.708479 (PMC8326404; doi:10.3389/fphar.2021.708479)
Supplement: Supplementary file 1 [file DataSheet1.ZIP › FigShares/FigShares/Figure 5.xlsx]

## Sheet: Sheet1
TG
	Control			Model			Positive			Low-dose			Middle-dose			High-dose
	0.28	0.02	20	0.55	0.03	19	0.34	0.03	20	0.36	0.05	20	0.39	0.05	20	0.31	0.05	20
TC
	Control			Model			Positive			Low-dose			Middle-dose			High-dose
	1.52	0.13	20	4.72	0.38	19	3.55	0.34	20	3.66	0.11	20	3.38	0.4	20	3.07	0.34	20
LDL
	Control			Model			Positive			Low-dose			Middle-dose			High-dose
	0.52	0.02	20	1.33	0.14	19	1.1	0.09	20	1.24	0.12	20	1.14	0.09	20	0.68	0.08	20
HDL
	Control			Model			Positive			Low-dose			Middle-dose			High-dose
	Mean	SD	N	Mean	SD	N	Mean	SD	N	Mean	SD	N	Mean	SD	N	Mean	SD	N
	0.65	0.02	20	0.34	0.04	19	0.36	0.03	20	0.48	0.03	20	0.48	0.02	20	0.62	0.02	20
ALT
	Control			Model			Positive			Low-dose			Middle-dose			High-dose
	Mean	SD	N	Mean	SD	N	Mean	SD	N	Mean	SD	N	Mean	SD	N	Mean	SD	N
	68.49	13.87	20	139.49	12.51	19	110.82	12.99	20	108.08	16.39	20	94.48	12.44	20	103.8	13.55	20
AST
	Control			Model			Positive			Low-dose			Middle-dose			High-dose
	Mean	SD	N	Mean	SD	N	Mean	SD	N	Mean	SD	N	Mean	SD	N	Mean	SD	N
	91.18	10.39	20	141.26	13.8	19	116.25	11.71	20	113.32	16.91	20	111.67	15.17	20	102.8	9.84	20
SCr
	Control			Model			Positive			Low-dose			Middle-dose			High-dose
	Mean	SD	N	Mean	SD	N	Mean	SD	N	Mean	SD	N	Mean	SD	N	Mean	SD	N
	22.99	4.84	20	38.39	5.75	20	26.37	4.12	19	26.37	4.12	18	36.73	5.37	19	31.1	12.48	19
BUN
	Control			Model			Positive			Low-dose			Middle-dose			High-dose
	Mean	SD	N	Mean	SD	N	Mean	SD	N	Mean	SD	N	Mean	SD	N	Mean	SD	N
	4.82	0.42	20	7.29	0.58	20	5.64	0.51	19	6.99	0.35	19	6.5	0.6	19	5.28	0.32	20
