# Supplementary material for: Anti-Autophagy Mechanism of Zhi Gan Prescription Based on Network Pharmacology in Nonalcoholic Steatohepatitis Rats
Source: Front Pharmacol. 2021 Jul 19;12:708479. doi: 10.3389/fphar.2021.708479 (PMC8326404; doi:10.3389/fphar.2021.708479)
Supplement: Supplementary file 1 [file DataSheet1.ZIP › FigShares/FigShares/Figure 7.xlsx]

## Sheet: Sheet1
ROS
	Control			Model			Positive			Low-dose			Middle-dose			High-dose
	Mean	SD	N	Mean	SD	N	Mean	SD	N	Mean	SD	N	Mean	SD	N	Mean	SD	N
	100	5	20	385	15	19	175	12	20	236	5	20	168	12	20	124	9	20
HNE
	Control			Model			Positive			Low-dose			Middle-dose			High-dose
	Mean	SD	N	Mean	SD	N	Mean	SD	N	Mean	SD	N	Mean	SD	N	Mean	SD	N
	45.34	6.61	20	124.47	12.84	19	64.4	9.89	20	117.87	15.91	20	92.8	19.74	20	86.98	4.95	20
MDA
	Control			Model			Positive			Low-dose			Middle-dose			High-dose
	Mean	SD	N	Mean	SD	N	Mean	SD	N	Mean	SD	N	Mean	SD	N	Mean	SD	N
	2.63	0.41	20	7.05	0.6	19	6.12	0.42	20	6.7	0.58	20	6.31	0.57	20	4.18	1	20
