# Supplementary material for: Anti-Autophagy Mechanism of Zhi Gan Prescription Based on Network Pharmacology in Nonalcoholic Steatohepatitis Rats
Source: Front Pharmacol. 2021 Jul 19;12:708479. doi: 10.3389/fphar.2021.708479 (PMC8326404; doi:10.3389/fphar.2021.708479)
Supplement: Supplementary file 1 [file DataSheet1.ZIP › FigShares/FigShares/Figure 7/Fig 6A-6C.xlsx]

## Sheet: Sheet1
IL6
	Control			Model			Positive			Low-dose			Middle-dose			High-dose
	Mean	SD	N	Mean	SD	N	Mean	SD	N	Mean	SD	N	Mean	SD	N	Mean	SD	N
	1	0.02	20	5.3	0.03	19	2.1	0.03	20	4.5	0.05	20	3.2	0.05	20	1.8	0.05	20
PTEN
	Control			Model			Positive			Low-dose			Middle-dose			High-dose
	Mean	SD	N	Mean	SD	N	Mean	SD	N	Mean	SD	N	Mean	SD	N	Mean	SD	N
	1	0.02	20	0.1	0.05	19	0.5	0.1	20	0.8	0.05	20	0.83	0.05	20	0.9	0.05	20
TNF
	Control			Model			Positive			Low-dose			Middle-dose			High-dose
	Mean	SD	N	Mean	SD	N	Mean	SD	N	Mean	SD	N	Mean	SD	N	Mean	SD	N
	1	0.02	20	6.8	0.05	19	1.8	0.1	20	4.1	0.05	20	3.5	0.05	20	1.1	0.05	20
