# Supplementary material for: Anti-Autophagy Mechanism of Zhi Gan Prescription Based on Network Pharmacology in Nonalcoholic Steatohepatitis Rats
Source: Front Pharmacol. 2021 Jul 19;12:708479. doi: 10.3389/fphar.2021.708479 (PMC8326404; doi:10.3389/fphar.2021.708479)
Supplement: Supplementary file 1 [file DataSheet1.ZIP › FigShares/FigShares/Figure 9/Fig 8B-8F.xlsx]

## Sheet: Sheet1
Cytc
	Control			Model			Positive			Low-dose			Middle-dose			High-dose
	Mean	SD	N	Mean	SD	N	Mean	SD	N	Mean	SD	N	Mean	SD	N	Mean	SD	N
	123.43	8.55	20	178.71	11.99	19	137.45	5.39	20	170	8.4	20	163.81	8.43	20	140.31	4.86	20
Mitochondrial activity
	Control			Model			Positive			Low-dose			Middle-dose			High-dose
	Mean	SD	N	Mean	SD	N	Mean	SD	N	Mean	SD	N	Mean	SD	N	Mean	SD	N
	1	0.02	20	0.72	0.013	19	0.86	0.014	20	0.75	0.02	20	0.82	0.01	20	0.91	0.017	20
Beclin1
	Control			Model			Positive			Low-dose			Middle-dose			High-dose
	Mean	SD	N	Mean	SD	N	Mean	SD	N	Mean	SD	N	Mean	SD	N	Mean	SD	N
	1	0.03	20	1.53	0.1	19	1.308	0.08	20	1.385	0.02	20	1.308	0.01	20	1.154	0.017	20
P62
	Control			Model			Positive			Low-dose			Middle-dose			High-dose
	Mean	SD	N	Mean	SD	N	Mean	SD	N	Mean	SD	N	Mean	SD	N	Mean	SD	N
	1	0.02	20	0.694	0.02	19	0.742	0.02	20	0.726	0.017	20	0.839	0.01	20	0.871	0.02	20
LC3
	Control			Model			Positive			Low-dose			Middle-dose			High-dose
	Mean	SD	N	Mean	SD	N	Mean	SD	N	Mean	SD	N	Mean	SD	N	Mean	SD	N
	1	0.012	20	1.534	0.02	19	1.324	0.02	20	1.487	0.017	20	1.312	0.01	20	1.187	0.02	20
