# Supplementary material for: Anti-Autophagy Mechanism of Zhi Gan Prescription Based on Network Pharmacology in Nonalcoholic Steatohepatitis Rats
Source: Front Pharmacol. 2021 Jul 19;12:708479. doi: 10.3389/fphar.2021.708479 (PMC8326404; doi:10.3389/fphar.2021.708479)
Supplement: Supplementary file 1 [file DataSheet1.ZIP › FigShares/FigShares/Figure 10/Fig 9A-9G.xlsx]

## Sheet: Sheet1
Mfn1
	Control			Model			Positive			Low-dose			Middle-dose			High-dose
	Mean	SD	N	Mean	SD	N	Mean	SD	N	Mean	SD	N	Mean	SD	N	Mean	SD	N
	1	0.02	20	0.919	0.05	19	1.176	0.02	20	1.189	0.01	20	1.23	0.03	20	1.297	0.04	20
Mfn2
	Control			Model			Positive			Low-dose			Middle-dose			High-dose
	Mean	SD	N	Mean	SD	N	Mean	SD	N	Mean	SD	N	Mean	SD	N	Mean	SD	N
	1	0.01	20	0.872	0.02	19	1.077	0.01	20	1.053	0.01	20	1.077	0.02	20	1.179	0.03	20
Opa1
	Control			Model			Positive			Low-dose			Middle-dose			High-dose
	Mean	SD	N	Mean	SD	N	Mean	SD	N	Mean	SD	N	Mean	SD	N	Mean	SD	N
	1	0.01	20	0.865	0.02	19	1.197	0.02	20	1.197	0.05	20	1.254	0.02	20	1.338	0.03	20
Fis
	Control			Model			Positive			Low-dose			Middle-dose			High-dose
	Mean	SD	N	Mean	SD	N	Mean	SD	N	Mean	SD	N	Mean	SD	N	Mean	SD	N
	1	0.01	20	2.7	0.06	19	1.5	0.09	20	1.8	0.03	20	1.6	0.07	20	0.9	0.03	20
Drp1
	Control			Model			Positive			Low-dose			Middle-dose			High-dose
	Mean	SD	N	Mean	SD	N	Mean	SD	N	Mean	SD	N	Mean	SD	N	Mean	SD	N
	1	0.02	20	1.6	0.04	19	1.2	0.01	20	1.255	0.03	20	1.2	0.01	20	1.09	0.03	20
Parkin
	Control			Model			Positive			Low-dose			Middle-dose			High-dose
	Mean	SD	N	Mean	SD	N	Mean	SD	N	Mean	SD	N	Mean	SD	N	Mean	SD	N
	1	0.01	20	1.478	0.02	19	1.304	0.02	20	1.543	0.02	20	1.283	0.03	20	1.261	0.01	20
PINK1
	Control			Model			Positive			Low-dose			Middle-dose			High-dose
	Mean	SD	N	Mean	SD	N	Mean	SD	N	Mean	SD	N	Mean	SD	N	Mean	SD	N
	1	0.02	20	1.561	0.01	19	1.439	0.02	20	1.659	0.02	20	1.39	0.02	20	1.244	0.03	20
