# Supplementary material for: Anti-Autophagy Mechanism of Zhi Gan Prescription Based on Network Pharmacology in Nonalcoholic Steatohepatitis Rats
Source: Front Pharmacol. 2021 Jul 19;12:708479. doi: 10.3389/fphar.2021.708479 (PMC8326404; doi:10.3389/fphar.2021.708479)
Supplement: Supplementary file 1 [file DataSheet1.ZIP › FigShares/FigShares/NASH biological process.csv]

Cluster	ID	Description	GeneRatio	BgRatio	pvalue	p.adjust	qvalue	geneID	Count
NASH	GO:1905952	NA	6/11	157/18670	1.4336027533298e-10	2.11975680491228e-07	5.4028472678695e-08	TNF/IL6/PON1/PPARA/PPARG/ADIPOQ	6
NASH	GO:0010888	negative regulation of lipid storage	4/11	19/18670	2.51603181591962e-10	2.11975680491228e-07	5.4028472678695e-08	TNF/IL6/PPARA/PPARG	4
NASH	GO:0032800	receptor biosynthetic process	4/11	26/18670	9.68413504847251e-10	5.43925585222539e-07	1.38636038588659e-07	TNF/PPARA/PPARG/ADIPOQ	4
NASH	GO:0050727	regulation of inflammatory response	7/11	485/18670	2.30642939884794e-09	9.71583384264693e-07	2.47637682823673e-07	INS/TNF/IL6/GGT1/PPARA/PPARG/ADIPOQ	7
NASH	GO:0045598	regulation of fat cell differentiation	5/11	132/18670	7.3101873059509e-09	2.46353312210545e-06	6.27906614911151e-07	INS/TNF/IL6/PPARG/ADIPOQ	5
NASH	GO:0010883	regulation of lipid storage	4/11	46/18670	1.05072965574432e-08	2.92356344199894e-06	7.45159384248362e-07	TNF/IL6/PPARA/PPARG	4
NASH	GO:0045834	positive regulation of lipid metabolic process	5/11	146/18670	1.21453674148324e-08	2.92356344199894e-06	7.45159384248362e-07	INS/TNF/PPARA/PPARG/ADIPOQ	5
NASH	GO:0062013	NA	5/11	153/18670	1.53699844831764e-08	3.23730298176902e-06	8.25125482781048e-07	INS/TNF/PPARA/PPARG/ADIPOQ	5
NASH	GO:0048660	regulation of smooth muscle cell proliferation	5/11	169/18670	2.53230272578118e-08	4.52620631273416e-06	1.15364184013465e-06	TNF/IL6/PPARG/PTEN/ADIPOQ	5
NASH	GO:0048659	smooth muscle cell proliferation	5/11	171/18670	2.68617585325469e-08	4.52620631273416e-06	1.15364184013465e-06	TNF/IL6/PPARG/PTEN/ADIPOQ	5
NASH	GO:0006631	fatty acid metabolic process	6/11	383/18670	3.03616846065538e-08	4.65085805109483e-06	1.18541314061952e-06	INS/GGT1/PON1/PPARA/PPARG/ADIPOQ	6
NASH	GO:1905953	NA	4/11	61/18670	3.34505170484967e-08	4.69701010222641e-06	1.19717639963041e-06	TNF/IL6/PPARA/PPARG	4
NASH	GO:0010876	lipid localization	6/11	400/18670	3.93096798367299e-08	5.09513927114538e-06	1.29865177112436e-06	TNF/IL6/PON1/PPARA/PPARG/ADIPOQ	6
NASH	GO:0010745	negative regulation of macrophage derived foam cell differentiation	3/11	13/18670	4.33752290630244e-08	5.22051864079973e-06	1.33060853065519e-06	PPARA/PPARG/ADIPOQ	3
NASH	GO:0019915	lipid storage	4/11	68/18670	5.20917328102746e-08	5.85163798568752e-06	1.4914685604626e-06	TNF/IL6/PPARA/PPARG	4
NASH	GO:0030730	sequestering of triglyceride	3/11	15/18670	6.89616831599663e-08	7.26252725778395e-06	1.85107675850436e-06	TNF/PPARA/PPARG	3
NASH	GO:0045444	fat cell differentiation	5/11	223/18670	1.01297525062873e-07	1.00403723371142e-05	2.55909537000942e-06	INS/TNF/IL6/PPARG/ADIPOQ	5
NASH	GO:1904705	regulation of vascular smooth muscle cell proliferation	4/11	85/18670	1.28853883006966e-07	1.14273048877231e-05	2.91259746630705e-06	TNF/PPARG/PTEN/ADIPOQ	4
NASH	GO:1990874	vascular smooth muscle cell proliferation	4/11	85/18670	1.28853883006966e-07	1.14273048877231e-05	2.91259746630705e-06	TNF/PPARG/PTEN/ADIPOQ	4
NASH	GO:0033002	muscle cell proliferation	5/11	239/18670	1.43056355279378e-07	1.20524979322876e-05	3.07194699757823e-06	TNF/IL6/PPARG/PTEN/ADIPOQ	5
NASH	GO:0019217	regulation of fatty acid metabolic process	4/11	96/18670	2.1070536399186e-07	1.63503940781673e-05	4.16739702257833e-06	INS/PPARA/PPARG/ADIPOQ	4
NASH	GO:0051091	positive regulation of sequence-specific DNA binding transcription factor activity	5/11	261/18670	2.2165963789739e-07	1.63503940781673e-05	4.16739702257833e-06	INS/TNF/IL6/PPARG/PTEN	5
NASH	GO:0050764	regulation of phagocytosis	4/11	98/18670	2.28981923410786e-07	1.63503940781673e-05	4.16739702257833e-06	TNF/PPARG/PTEN/ADIPOQ	4
NASH	GO:0010869	regulation of receptor biosynthetic process	3/11	22/18670	2.3288395126173e-07	1.63503940781673e-05	4.16739702257833e-06	PPARA/PPARG/ADIPOQ	3
NASH	GO:0032868	response to insulin	5/11	272/18670	2.72092409609437e-07	1.83390284076761e-05	4.67426118402739e-06	INS/PPARA/PPARG/PTEN/ADIPOQ	5
NASH	GO:0034219	carbohydrate transmembrane transport	4/11	116/18670	4.51434052926704e-07	2.92563991992883e-05	7.45688638032775e-06	INS/SLC17A5/TNF/ADIPOQ	4
NASH	GO:0010743	regulation of macrophage derived foam cell differentiation	3/11	30/18670	6.12389053741983e-07	3.82176131687127e-05	9.74092529928769e-06	PPARA/PPARG/ADIPOQ	3
NASH	GO:0032368	regulation of lipid transport	4/11	127/18670	6.49415010930828e-07	3.90808676220873e-05	9.96095204736007e-06	PON1/PPARA/PPARG/ADIPOQ	4
NASH	GO:0033028	myeloid cell apoptotic process	3/11	33/18670	8.22160585156931e-07	4.77703650341182e-05	1.21757357075872e-05	IL6/PTEN/ADIPOQ	3
NASH	GO:0010742	macrophage derived foam cell differentiation	3/11	36/18670	1.07488346273561e-06	5.76899091740893e-05	1.47040343233037e-05	PPARA/PPARG/ADIPOQ	3
NASH	GO:0090077	foam cell differentiation	3/11	36/18670	1.07488346273561e-06	5.76899091740893e-05	1.47040343233037e-05	PPARA/PPARG/ADIPOQ	3
NASH	GO:0031331	positive regulation of cellular catabolic process	5/11	361/18670	1.10383184708051e-06	5.76899091740893e-05	1.47040343233037e-05	INS/TNF/IL6/PPARA/PTEN	5
NASH	GO:0032102	negative regulation of response to external stimulus	5/11	365/18670	1.16544645037743e-06	5.76899091740893e-05	1.47040343233037e-05	INS/PPARA/PPARG/PTEN/ADIPOQ	5
NASH	GO:0045923	positive regulation of fatty acid metabolic process	3/11	37/18670	1.16934987923819e-06	5.76899091740893e-05	1.47040343233037e-05	PPARA/PPARG/ADIPOQ	3
NASH	GO:0008643	carbohydrate transport	4/11	148/18670	1.19830671874963e-06	5.76899091740893e-05	1.47040343233037e-05	INS/SLC17A5/TNF/ADIPOQ	4
NASH	GO:1904706	negative regulation of vascular smooth muscle cell proliferation	3/11	38/18670	1.26917150028279e-06	5.94042771660138e-05	1.51409933367069e-05	PPARG/PTEN/ADIPOQ	3
NASH	GO:0048545	response to steroid hormone	5/11	385/18670	1.51563426365734e-06	6.90228036287195e-05	1.75925684088818e-05	TNF/IL6/PPARA/PPARG/ADIPOQ	5
NASH	GO:0002673	regulation of acute inflammatory response	4/11	159/18670	1.59553464376201e-06	7.07493651247102e-05	1.8032635309e-05	INS/TNF/IL6/PPARG	4
NASH	GO:0010677	negative regulation of cellular carbohydrate metabolic process	3/11	42/18670	1.72491116799976e-06	7.45250081558871e-05	1.89949731860702e-05	INS/PPARA/ADIPOQ	3
NASH	GO:0050728	negative regulation of inflammatory response	4/11	169/18670	2.03487861991828e-06	8.48723445865471e-05	2.16323077253233e-05	INS/PPARA/PPARG/ADIPOQ	4
NASH	GO:0019216	regulation of lipid metabolic process	5/11	410/18670	2.06514310269937e-06	8.48723445865471e-05	2.16323077253233e-05	INS/TNF/PPARA/PPARG/ADIPOQ	5
NASH	GO:0009896	positive regulation of catabolic process	5/11	423/18670	2.40726522145744e-06	9.36893595932752e-05	2.38795931370022e-05	INS/TNF/IL6/PPARA/PTEN	5
NASH	GO:0006953	acute-phase response	3/11	47/18670	2.432445475892e-06	9.36893595932752e-05	2.38795931370022e-05	INS/TNF/IL6	3
NASH	GO:0001959	regulation of cytokine-mediated signaling pathway	4/11	177/18670	2.4464877282517e-06	9.36893595932752e-05	2.38795931370022e-05	TNF/IL6/PPARG/ADIPOQ	4
NASH	GO:0006111	regulation of gluconeogenesis	3/11	48/18670	2.59377375707003e-06	9.38703451028327e-05	2.39257228186511e-05	INS/PPARA/ADIPOQ	3
NASH	GO:0045912	negative regulation of carbohydrate metabolic process	3/11	48/18670	2.59377375707003e-06	9.38703451028327e-05	2.39257228186511e-05	INS/PPARA/ADIPOQ	3
NASH	GO:0051090	regulation of sequence-specific DNA binding transcription factor activity	5/11	432/18670	2.66926659205903e-06	9.38703451028327e-05	2.39257228186511e-05	INS/TNF/IL6/PPARG/PTEN	5
NASH	GO:0010565	regulation of cellular ketone metabolic process	4/11	181/18670	2.67405137384924e-06	9.38703451028327e-05	2.39257228186511e-05	INS/PPARA/PPARG/ADIPOQ	4
NASH	GO:0043434	response to peptide hormone	5/11	436/18670	2.7927071500946e-06	9.60349295491714e-05	2.44774332382083e-05	INS/PPARA/PPARG/PTEN/ADIPOQ	5
NASH	GO:0044282	small molecule catabolic process	5/11	445/18670	3.08696008867863e-06	0.000103081777545527	2.62735375533811e-05	GPT/PON1/PPARA/PTEN/ADIPOQ	5
NASH	GO:0045599	negative regulation of fat cell differentiation	3/11	51/18670	3.11998258446401e-06	0.000103081777545527	2.62735375533811e-05	TNF/IL6/ADIPOQ	3
NASH	GO:0060759	regulation of response to cytokine stimulus	4/11	190/18670	3.24325316289473e-06	0.000105093876528416	2.67863823979969e-05	TNF/IL6/PPARG/ADIPOQ	4
NASH	GO:0043112	receptor metabolic process	4/11	192/18670	3.38106718854434e-06	0.000107492419107495	2.73977241891974e-05	TNF/PPARA/PPARG/ADIPOQ	4
NASH	GO:0062012	NA	5/11	459/18670	3.59283204704297e-06	0.000110818467543364	2.82454691598891e-05	INS/TNF/PPARA/PPARG/ADIPOQ	5
NASH	GO:0046394	carboxylic acid biosynthetic process	5/11	462/18670	3.70928319850031e-06	0.000110818467543364	2.82454691598891e-05	INS/GPT/GGT1/PPARA/ADIPOQ	5
NASH	GO:0050994	regulation of lipid catabolic process	3/11	54/18670	3.71252682285071e-06	0.000110818467543364	2.82454691598891e-05	INS/TNF/PPARA	3
NASH	GO:0016053	organic acid biosynthetic process	5/11	463/18670	3.74875528188234e-06	0.000110818467543364	2.82454691598891e-05	INS/GPT/GGT1/PPARA/ADIPOQ	5
NASH	GO:0032722	positive regulation of chemokine production	3/11	58/18670	4.61241545354249e-06	0.000132680877940405	3.38177717942747e-05	TNF/IL6/ADIPOQ	3
NASH	GO:0007623	circadian rhythm	4/11	208/18670	4.64579928693406e-06	0.000132680877940405	3.38177717942747e-05	PPARA/PPARG/PTEN/ADIPOQ	4
NASH	GO:0006006	glucose metabolic process	4/11	209/18670	4.73501871550915e-06	0.000132975108927215	3.38927655425918e-05	INS/TNF/PPARA/ADIPOQ	4
NASH	GO:0046324	regulation of glucose import	3/11	60/18670	5.11198107873917e-06	0.000141208001929107	3.59911696311576e-05	INS/TNF/ADIPOQ	3
NASH	GO:0032869	cellular response to insulin stimulus	4/11	216/18670	5.39562559892863e-06	0.000144596979414366	3.68549539909802e-05	INS/PPARG/PTEN/ADIPOQ	4
NASH	GO:0031667	response to nutrient levels	5/11	499/18670	5.40629655970628e-06	0.000144596979414366	3.68549539909802e-05	PON1/PPARA/PPARG/PTEN/ADIPOQ	5
NASH	GO:0010001	glial cell differentiation	4/11	218/18670	5.59631626083912e-06	0.000147340514054905	3.75542275398415e-05	TNF/IL6/PPARG/PTEN	4
NASH	GO:0002526	acute inflammatory response	4/11	220/18670	5.80249012040823e-06	0.000149047877518681	3.79894012354346e-05	INS/TNF/IL6/PPARG	4
NASH	GO:0032371	regulation of sterol transport	3/11	63/18670	5.92653281528288e-06	0.000149047877518681	3.79894012354346e-05	PON1/PPARG/ADIPOQ	3
NASH	GO:0032374	regulation of cholesterol transport	3/11	63/18670	5.92653281528288e-06	0.000149047877518681	3.79894012354346e-05	PON1/PPARG/ADIPOQ	3
NASH	GO:0048662	negative regulation of smooth muscle cell proliferation	3/11	67/18670	7.14021883955078e-06	0.000176930422715339	4.50961189866365e-05	PPARG/PTEN/ADIPOQ	3
NASH	GO:0046323	glucose import	3/11	68/18670	7.46736316755417e-06	0.000182355173004765	4.64787821870649e-05	INS/TNF/ADIPOQ	3
NASH	GO:0030258	lipid modification	4/11	238/18670	7.92088994573287e-06	0.000190667136550856	4.85973398174287e-05	PPARA/PPARG/PTEN/ADIPOQ	4
NASH	GO:0031348	negative regulation of defense response	4/11	239/18670	8.05327860259165e-06	0.000191123583737562	4.87136793158991e-05	INS/PPARA/PPARG/ADIPOQ	4
NASH	GO:0042180	cellular ketone metabolic process	4/11	248/18670	9.31977668911417e-06	0.000215120872892567	5.48301209684006e-05	INS/PPARA/PPARG/ADIPOQ	4
NASH	GO:0046434	organophosphate catabolic process	4/11	248/18670	9.31977668911417e-06	0.000215120872892567	5.48301209684006e-05	INS/PON1/PPARA/PTEN	4
NASH	GO:0019318	hexose metabolic process	4/11	249/18670	9.46907230908112e-06	0.000215613335686509	5.49556401437425e-05	INS/TNF/PPARA/ADIPOQ	4
NASH	GO:0014015	positive regulation of gliogenesis	3/11	74/18670	9.64023906810426e-06	0.000216584037730076	5.52030531899865e-05	TNF/IL6/PPARG	3
NASH	GO:0001960	negative regulation of cytokine-mediated signaling pathway	3/11	75/18670	1.00386831050758e-05	0.000222568171474378	5.67282923389324e-05	IL6/PPARG/ADIPOQ	3
NASH	GO:0010827	regulation of glucose transport	3/11	78/18670	1.12990082452596e-05	0.000247257518094318	6.30211259612567e-05	INS/TNF/ADIPOQ	3
NASH	GO:0060761	negative regulation of response to cytokine stimulus	3/11	81/18670	1.26597164817122e-05	0.000273482336816476	6.97053215187395e-05	IL6/PPARG/ADIPOQ	3
NASH	GO:0032642	regulation of chemokine production	3/11	82/18670	1.31362345364601e-05	0.000280184242961206	7.14135068737604e-05	TNF/IL6/ADIPOQ	3
NASH	GO:0016054	organic acid catabolic process	4/11	275/18670	1.40095097933789e-05	0.00029107775807278	7.41900517218142e-05	GPT/PON1/PPARA/ADIPOQ	4
NASH	GO:0046395	carboxylic acid catabolic process	4/11	275/18670	1.40095097933789e-05	0.00029107775807278	7.41900517218142e-05	GPT/PON1/PPARA/ADIPOQ	4
NASH	GO:0045713	low-density lipoprotein particle receptor biosynthetic process	2/11	10/18670	1.41652084047287e-05	0.00029107775807278	7.41900517218142e-05	PPARG/ADIPOQ	2
NASH	GO:0070542	response to fatty acid	3/11	86/18670	1.51607009514544e-05	0.000305952031189763	7.79812142592056e-05	PON1/PPARG/ADIPOQ	3
NASH	GO:0030100	regulation of endocytosis	4/11	281/18670	1.52522080830505e-05	0.000305952031189763	7.79812142592056e-05	TNF/PPARG/PTEN/ADIPOQ	4
NASH	GO:0032409	regulation of transporter activity	4/11	283/18670	1.56839811838407e-05	0.00031091186229143	7.92453786130897e-05	INS/PON1/PPARG/PTEN	4
NASH	GO:0044262	cellular carbohydrate metabolic process	4/11	286/18670	1.63484891786736e-05	0.000320316328675174	8.16423939400099e-05	INS/PPARA/PTEN/ADIPOQ	4
NASH	GO:0006094	gluconeogenesis	3/11	89/18670	1.68071840359253e-05	0.000321819376142433	8.20254914671953e-05	INS/PPARA/ADIPOQ	3
NASH	GO:0032602	chemokine production	3/11	89/18670	1.68071840359253e-05	0.000321819376142433	8.20254914671953e-05	TNF/IL6/ADIPOQ	3
NASH	GO:0042063	gliogenesis	4/11	290/18670	1.72665739258679e-05	0.000326900865899859	8.33206642431002e-05	TNF/IL6/PPARG/PTEN	4
NASH	GO:0005996	monosaccharide metabolic process	4/11	292/18670	1.77396316992953e-05	0.000332125326814584	8.4652277582602e-05	INS/TNF/PPARA/ADIPOQ	4
NASH	GO:0048511	rhythmic process	4/11	295/18670	1.84670770246474e-05	0.000340069129982368	8.66769983025495e-05	PPARA/PPARG/PTEN/ADIPOQ	4
NASH	GO:0019319	hexose biosynthetic process	3/11	92/18670	1.85675726755952e-05	0.000340069129982368	8.66769983025495e-05	INS/PPARA/ADIPOQ	3
NASH	GO:0002674	negative regulation of acute inflammatory response	2/11	12/18670	2.07622863306494e-05	0.000372175026246215	9.48601659899771e-05	INS/PPARG	2
NASH	GO:0010889	regulation of sequestering of triglyceride	2/11	12/18670	2.07622863306494e-05	0.000372175026246215	9.48601659899771e-05	PPARA/PPARG	2
NASH	GO:0043255	regulation of carbohydrate biosynthetic process	3/11	97/18670	2.1764592926988e-05	0.000386035148231313	9.83928411546937e-05	INS/PPARA/ADIPOQ	3
NASH	GO:0046364	monosaccharide biosynthetic process	3/11	98/18670	2.24446648534168e-05	0.000393950627895909	0.000100410342765286	INS/PPARA/ADIPOQ	3
NASH	GO:0046879	hormone secretion	4/11	312/18670	2.30131917675379e-05	0.0003978423564928	0.000101402268592261	INS/TNF/IL6/ADIPOQ	4
NASH	GO:0019395	fatty acid oxidation	3/11	99/18670	2.31386058969106e-05	0.0003978423564928	0.000101402268592261	PPARA/PPARG/ADIPOQ	3
NASH	GO:0030301	cholesterol transport	3/11	100/18670	2.38465499041937e-05	0.000405873096854205	0.00010344914790974	PON1/PPARG/ADIPOQ	3
NASH	GO:0034440	lipid oxidation	3/11	101/18670	2.45686305402419e-05	0.000413981424603076	0.000105515802741249	PPARA/PPARG/ADIPOQ	3
NASH	GO:0071375	cellular response to peptide hormone stimulus	4/11	321/18670	2.57294153254631e-05	0.000429248166568369	0.000109406997944647	INS/PPARG/PTEN/ADIPOQ	4
NASH	GO:0009914	hormone transport	4/11	322/18670	2.60451597941928e-05	0.00043025582601191	0.000109663830712391	INS/TNF/IL6/ADIPOQ	4
NASH	GO:0051235	maintenance of location	4/11	330/18670	2.86750115122823e-05	0.000469100916487336	0.000119564687756885	TNF/IL6/PPARA/PPARG	4
NASH	GO:0062014	NA	3/11	107/18670	2.920544593414e-05	0.000473184388452172	0.0001206054852341	INS/PPARA/ADIPOQ	3
NASH	GO:0016042	lipid catabolic process	4/11	333/18670	2.97099118303603e-05	0.000476773346991973	0.000121520240870045	INS/TNF/PPARA/ADIPOQ	4
NASH	GO:1904659	glucose transmembrane transport	3/11	108/18670	3.00302103532996e-05	0.00047736702306896	0.000121671557340082	INS/TNF/ADIPOQ	3
NASH	GO:0045073	regulation of chemokine biosynthetic process	2/11	15/18670	3.2999071365216e-05	0.00050762521323256	0.000129383780727087	TNF/IL6	2
NASH	GO:0046321	positive regulation of fatty acid oxidation	2/11	15/18670	3.2999071365216e-05	0.00050762521323256	0.000129383780727087	PPARA/PPARG	2
NASH	GO:0001101	response to acid chemical	4/11	343/18670	3.33590375484317e-05	0.00050762521323256	0.000129383780727087	TNF/PON1/PPARG/ADIPOQ	4
NASH	GO:0008645	hexose transport	3/11	112/18670	3.34825817068603e-05	0.00050762521323256	0.000129383780727087	INS/TNF/ADIPOQ	3
NASH	GO:0015918	sterol transport	3/11	112/18670	3.34825817068603e-05	0.00050762521323256	0.000129383780727087	PON1/PPARG/ADIPOQ	3
NASH	GO:0010721	negative regulation of cell development	4/11	344/18670	3.37412604641227e-05	0.00050762521323256	0.000129383780727087	TNF/IL6/PPARA/PTEN	4
NASH	GO:0015749	monosaccharide transport	3/11	114/18670	3.5302599670686e-05	0.000526414871195627	0.000134172898608662	INS/TNF/ADIPOQ	3
NASH	GO:0021782	glial cell development	3/11	116/18670	3.71865731859196e-05	0.000538358973440822	0.000137217217656633	TNF/IL6/PTEN	3
NASH	GO:0010875	positive regulation of cholesterol efflux	2/11	16/18670	3.77011031845798e-05	0.000538358973440822	0.000137217217656633	PON1/ADIPOQ	2
NASH	GO:0010885	regulation of cholesterol storage	2/11	16/18670	3.77011031845798e-05	0.000538358973440822	0.000137217217656633	PPARA/PPARG	2
NASH	GO:0042033	chemokine biosynthetic process	2/11	16/18670	3.77011031845798e-05	0.000538358973440822	0.000137217217656633	TNF/IL6	2
NASH	GO:0050755	chemokine metabolic process	2/11	16/18670	3.77011031845798e-05	0.000538358973440822	0.000137217217656633	TNF/IL6	2
NASH	GO:0010906	regulation of glucose metabolic process	3/11	117/18670	3.81528705517315e-05	0.000540231822518215	0.000137694570412264	INS/PPARA/ADIPOQ	3
NASH	GO:0006869	lipid transport	4/11	365/18670	4.25373357716455e-05	0.000585149593301679	0.000149143235400334	PON1/PPARA/PPARG/ADIPOQ	4
NASH	GO:0032966	negative regulation of collagen biosynthetic process	2/11	17/18670	4.2714183962081e-05	0.000585149593301679	0.000149143235400334	IL6/PPARG	2
NASH	GO:0045721	negative regulation of gluconeogenesis	2/11	17/18670	4.2714183962081e-05	0.000585149593301679	0.000149143235400334	INS/ADIPOQ	2
NASH	GO:1905331	NA	2/11	17/18670	4.2714183962081e-05	0.000585149593301679	0.000149143235400334	TNF/PTEN	2
NASH	GO:0006909	phagocytosis	4/11	369/18670	4.43869025443251e-05	0.000598335446297502	0.000152504052531239	TNF/PPARG/PTEN/ADIPOQ	4
NASH	GO:0035690	cellular response to drug	4/11	369/18670	4.43869025443251e-05	0.000598335446297502	0.000152504052531239	TNF/IL6/PTEN/ADIPOQ	4
NASH	GO:0014013	regulation of gliogenesis	3/11	124/18670	4.53829182453655e-05	0.000602127694830243	0.000153470622827262	TNF/IL6/PPARG	3
NASH	GO:0014066	regulation of phosphatidylinositol 3-kinase signaling	3/11	124/18670	4.53829182453655e-05	0.000602127694830243	0.000153470622827262	INS/TNF/PTEN	3
NASH	GO:0051098	regulation of binding	4/11	373/18670	4.6294937995265e-05	0.000609429457203293	0.000155331699852534	PON1/PPARA/PPARG/ADIPOQ	4
NASH	GO:0010713	negative regulation of collagen metabolic process	2/11	18/18670	4.80380123216861e-05	0.000613212505773038	0.000156295925257161	IL6/PPARG	2
NASH	GO:0010878	cholesterol storage	2/11	18/18670	4.80380123216861e-05	0.000613212505773038	0.000156295925257161	PPARA/PPARG	2
NASH	GO:0051023	regulation of immunoglobulin secretion	2/11	18/18670	4.80380123216861e-05	0.000613212505773038	0.000156295925257161	TNF/IL6	2
NASH	GO:0150078	NA	2/11	18/18670	4.80380123216861e-05	0.000613212505773038	0.000156295925257161	TNF/IL6	2
NASH	GO:1901653	cellular response to peptide	4/11	385/18670	5.23814573417084e-05	0.000663629741509614	0.000169146296758346	INS/PPARG/PTEN/ADIPOQ	4
NASH	GO:0060252	positive regulation of glial cell proliferation	2/11	19/18670	5.36722870815168e-05	0.000674908983077282	0.000172021155767941	TNF/IL6	2
NASH	GO:0070482	response to oxygen levels	4/11	394/18670	5.73175639530651e-05	0.000715408113043813	0.000182343595265891	PPARA/PPARG/PTEN/ADIPOQ	4
NASH	GO:0022407	regulation of cell-cell adhesion	4/11	403/18670	6.25869649099998e-05	0.000775434087304042	0.00019764304708421	TNF/IL6/PPARA/ADIPOQ	4
NASH	GO:0010675	regulation of cellular carbohydrate metabolic process	3/11	142/18670	6.79706305382547e-05	0.0008359891420216	0.00021307735120713	INS/PPARA/ADIPOQ	3
NASH	GO:0048305	immunoglobulin secretion	2/11	22/18670	7.24347808538587e-05	0.000871804326705371	0.000222205944273491	TNF/IL6	2
NASH	GO:0050765	negative regulation of phagocytosis	2/11	22/18670	7.24347808538587e-05	0.000871804326705371	0.000222205944273491	PTEN/ADIPOQ	2
NASH	GO:0051000	positive regulation of nitric-oxide synthase activity	2/11	22/18670	7.24347808538587e-05	0.000871804326705371	0.000222205944273491	INS/TNF	2
NASH	GO:0051384	response to glucocorticoid	3/11	146/18670	7.38259475311412e-05	0.000882246252411155	0.000224867387776824	TNF/IL6/ADIPOQ	3
NASH	GO:0014065	phosphatidylinositol 3-kinase signaling	3/11	148/18670	7.68736504509081e-05	0.000902930399116361	0.000230139373943136	INS/TNF/PTEN	3
NASH	GO:0014074	response to purine-containing compound	3/11	149/18670	7.84279516453305e-05	0.000902930399116361	0.000230139373943136	PPARG/PTEN/ADIPOQ	3
NASH	GO:0032373	positive regulation of sterol transport	2/11	23/18670	7.93078332755023e-05	0.000902930399116361	0.000230139373943136	PON1/ADIPOQ	2
NASH	GO:0032376	positive regulation of cholesterol transport	2/11	23/18670	7.93078332755023e-05	0.000902930399116361	0.000230139373943136	PON1/ADIPOQ	2
NASH	GO:0032799	low-density lipoprotein receptor particle metabolic process	2/11	23/18670	7.93078332755023e-05	0.000902930399116361	0.000230139373943136	PPARG/ADIPOQ	2
NASH	GO:0050995	negative regulation of lipid catabolic process	2/11	23/18670	7.93078332755023e-05	0.000902930399116361	0.000230139373943136	INS/TNF	2
NASH	GO:1901889	negative regulation of cell junction assembly	2/11	23/18670	7.93078332755023e-05	0.000902930399116361	0.000230139373943136	TNF/PTEN	2
NASH	GO:0050777	negative regulation of immune response	3/11	150/18670	8.0002719292366e-05	0.000904728738306286	0.00023059773557955	INS/TNF/PPARG	3
NASH	GO:0050804	modulation of synaptic transmission	4/11	436/18670	8.49853344237497e-05	0.000954668590026789	0.00024332643119221	INS/TNF/PTEN/ADIPOQ	4
NASH	GO:0099177	NA	4/11	437/18670	8.57443281759067e-05	0.000956815847525846	0.000243873725310352	INS/TNF/PTEN/ADIPOQ	4
NASH	GO:0006979	response to oxidative stress	4/11	451/18670	9.68995338851098e-05	0.00107418233287112	0.00027378815668369	INS/TNF/IL6/ADIPOQ	4
NASH	GO:0031960	response to corticosteroid	3/11	162/18670	0.000100541550010194	0.00110727131873971	0.000282221894765456	TNF/IL6/ADIPOQ	3
NASH	GO:0034114	regulation of heterotypic cell-cell adhesion	2/11	26/18670	0.000101779451056481	0.00111362581188422	0.000283841531312674	TNF/ADIPOQ	2
NASH	GO:0050680	negative regulation of epithelial cell proliferation	3/11	165/18670	0.000106164625682559	0.00114905994513483	0.000292873001789794	TNF/PPARG/PTEN	3
NASH	GO:0023061	signal release	4/11	462/18670	0.000106381810944234	0.00114905994513483	0.000292873001789794	INS/TNF/IL6/ADIPOQ	4
NASH	GO:0002683	negative regulation of immune system process	4/11	463/18670	0.000107276216658067	0.00115134028706269	0.000293454216536986	INS/TNF/PPARG/ADIPOQ	4
NASH	GO:0001819	positive regulation of cytokine production	4/11	464/18670	0.000108176109340072	0.00115365027998748	0.000294042988745833	INS/TNF/IL6/ADIPOQ	4
NASH	GO:0048143	astrocyte activation	2/11	27/18670	0.000109886477737012	0.00116452022004317	0.000296813524771273	TNF/IL6	2
NASH	GO:0050806	positive regulation of synaptic transmission	3/11	168/18670	0.000111989674864482	0.00117939126341658	0.000300603864109927	INS/TNF/PTEN	3
NASH	GO:0050769	positive regulation of neurogenesis	4/11	474/18670	0.000117481434668418	0.00122954172308251	0.000313386239586235	TNF/IL6/PPARG/PTEN	4
NASH	GO:0032770	positive regulation of monooxygenase activity	2/11	28/18670	0.000118301248901803	0.00123047903950332	0.000313625143287431	INS/TNF	2
NASH	GO:0033032	regulation of myeloid cell apoptotic process	2/11	29/18670	0.000127023465305184	0.00131309533152905	0.000334682427152181	PTEN/ADIPOQ	2
NASH	GO:0046320	regulation of fatty acid oxidation	2/11	30/18670	0.000136052827894573	0.00139785984757534	0.000356287251482579	PPARA/PPARG	2
NASH	GO:0048015	phosphatidylinositol-mediated signaling	3/11	181/18670	0.000139645413876725	0.00142607589322595	0.000363478972004491	INS/TNF/PTEN	3
NASH	GO:0008217	regulation of blood pressure	3/11	182/18670	0.000141940030017576	0.00144077681072058	0.000367225949569887	PPARA/PPARG/ADIPOQ	3
NASH	GO:0002675	positive regulation of acute inflammatory response	2/11	31/18670	0.000145389037810377	0.00146694927371548	0.000373896800672133	TNF/IL6	2
NASH	GO:0048017	inositol lipid-mediated signaling	3/11	184/18670	0.000146602856733659	0.00147039174759652	0.000374774220221383	INS/TNF/PTEN	3
NASH	GO:0055022	negative regulation of cardiac muscle tissue growth	2/11	32/18670	0.000155031796385899	0.00153663868770729	0.000391659275080165	PPARA/PTEN	2
NASH	GO:0061117	negative regulation of heart growth	2/11	32/18670	0.000155031796385899	0.00153663868770729	0.000391659275080165	PPARA/PTEN	2
NASH	GO:0006367	transcription initiation from RNA polymerase II promoter	3/11	188/18670	0.000156226215573969	0.00153942206574349	0.000392368703934622	PPARA/PPARG/PTEN	3
NASH	GO:0050731	positive regulation of peptidyl-tyrosine phosphorylation	3/11	192/18670	0.000166252828446384	0.00162869776704743	0.000415123341530752	TNF/IL6/ADIPOQ	3
NASH	GO:0051224	negative regulation of protein transport	3/11	193/18670	0.000168823374441706	0.0016443201499091	0.000419105182672443	INS/TNF/ADIPOQ	3
NASH	GO:1904950	negative regulation of establishment of protein localization	3/11	197/18670	0.000179364650366192	0.00173695078084502	0.000442714926493685	INS/TNF/ADIPOQ	3
NASH	GO:0046890	regulation of lipid biosynthetic process	3/11	198/18670	0.000182065327027507	0.00175302900595056	0.000446812952945701	INS/TNF/ADIPOQ	3
NASH	GO:0060251	regulation of glial cell proliferation	2/11	35/18670	0.000185796380295168	0.00177878920907589	0.000453378727036055	TNF/IL6	2
NASH	GO:0002573	myeloid leukocyte differentiation	3/11	204/18670	0.000198827356883061	0.00189279150479072	0.000482435691991014	TNF/PPARG/ADIPOQ	3
NASH	GO:0006109	regulation of carbohydrate metabolic process	3/11	206/18670	0.000204630041414864	0.00193708775159576	0.000493725942621316	INS/PPARA/ADIPOQ	3
NASH	GO:0046326	positive regulation of glucose import	2/11	38/18670	0.00021930916863829	0.00204449666148736	0.000521102381937743	INS/ADIPOQ	2
NASH	GO:2000279	negative regulation of DNA biosynthetic process	2/11	38/18670	0.00021930916863829	0.00204449666148736	0.000521102381937743	PPARG/ADIPOQ	2
NASH	GO:1903531	negative regulation of secretion by cell	3/11	211/18670	0.000219616555328909	0.00204449666148736	0.000521102381937743	INS/TNF/ADIPOQ	3
NASH	GO:0016051	carbohydrate biosynthetic process	3/11	214/18670	0.000228942056425779	0.00211622649440133	0.000539384919391374	INS/PPARA/ADIPOQ	3
NASH	GO:0010661	positive regulation of muscle cell apoptotic process	2/11	39/18670	0.000231089421347089	0.00211622649440133	0.000539384919391374	PPARG/PTEN	2
NASH	GO:0010874	regulation of cholesterol efflux	2/11	39/18670	0.000231089421347089	0.00211622649440133	0.000539384919391374	PON1/ADIPOQ	2
NASH	GO:0050807	regulation of synapse organization	3/11	218/18670	0.000241771636127813	0.00220208219932629	0.000561267866515775	INS/TNF/PTEN	3
NASH	GO:0046621	negative regulation of organ growth	2/11	40/18670	0.000243173840314608	0.00220294581145223	0.000561487984427618	PPARA/PTEN	2
NASH	GO:0007584	response to nutrient	3/11	219/18670	0.000245050426743423	0.00220807470086988	0.000562795238453794	PPARG/PTEN/ADIPOQ	3
NASH	GO:0050873	brown fat cell differentiation	2/11	41/18670	0.000255562128605849	0.0022784242682585	0.000580725973106024	INS/ADIPOQ	2
NASH	GO:0150077	NA	2/11	41/18670	0.000255562128605849	0.0022784242682585	0.000580725973106024	TNF/IL6	2
NASH	GO:0010907	positive regulation of glucose metabolic process	2/11	42/18670	0.000268253989477741	0.00237898932773681	0.000606358048237776	INS/PPARA	2
NASH	GO:0050803	regulation of synapse structure or activity	3/11	227/18670	0.000272326453411211	0.00240246112040781	0.000612340551070676	INS/TNF/PTEN	3
NASH	GO:0055026	negative regulation of cardiac muscle tissue development	2/11	43/18670	0.000281249126379047	0.00246825405181611	0.000629109887953131	PPARA/PTEN	2
NASH	GO:0097305	response to alcohol	3/11	233/18670	0.000294026991468717	0.00253220461413875	0.000645409640836238	PPARG/PTEN/ADIPOQ	3
NASH	GO:0010828	positive regulation of glucose transport	2/11	44/18670	0.000294547242950264	0.00253220461413875	0.000645409640836238	INS/ADIPOQ	2
NASH	GO:0014002	astrocyte development	2/11	44/18670	0.000294547242950264	0.00253220461413875	0.000645409640836238	TNF/IL6	2
NASH	GO:0032965	regulation of collagen biosynthetic process	2/11	44/18670	0.000294547242950264	0.00253220461413875	0.000645409640836238	IL6/PPARG	2
NASH	GO:0051048	negative regulation of secretion	3/11	238/18670	0.000312944355348368	0.00267670679574619	0.000682240432712446	INS/TNF/ADIPOQ	3
NASH	GO:0045776	negative regulation of blood pressure	2/11	46/18670	0.00032205123062252	0.00274068850302498	0.00069854812383832	PPARA/ADIPOQ	2
NASH	GO:0042593	glucose homeostasis	3/11	241/18670	0.000324664697445408	0.00274904530249002	0.000700678109271233	INS/PPARG/ADIPOQ	3
NASH	GO:0033500	carbohydrate homeostasis	3/11	242/18670	0.000328633790447777	0.00276873968452252	0.000705697823698384	INS/PPARG/ADIPOQ	3
NASH	GO:0031952	regulation of protein autophosphorylation	2/11	47/18670	0.00033625650996237	0.00279449448003048	0.000712262219492387	INS/ADIPOQ	2
NASH	GO:0061614	pri-miRNA transcription from RNA polymerase II promoter	2/11	47/18670	0.00033625650996237	0.00279449448003048	0.000712262219492387	PPARA/PPARG	2
NASH	GO:0051896	regulation of protein kinase B signaling	3/11	244/18670	0.000336666100561536	0.00279449448003048	0.000712262219492387	INS/TNF/PTEN	3
NASH	GO:0097237	cellular response to toxic substance	3/11	247/18670	0.000348951509654047	0.00286910991010924	0.000731280239465607	TNF/IL6/PTEN	3
NASH	GO:0001774	microglial cell activation	2/11	48/18670	0.000350763585449557	0.00286910991010924	0.000731280239465607	TNF/IL6	2
NASH	GO:0002269	leukocyte activation involved in inflammatory response	2/11	48/18670	0.000350763585449557	0.00286910991010924	0.000731280239465607	TNF/IL6	2
NASH	GO:0006352	DNA-templated transcription, initiation	3/11	249/18670	0.000357301011827158	0.0028944817544652	0.00073774702846903	PPARA/PPARG/PTEN	3
NASH	GO:0045926	negative regulation of growth	3/11	249/18670	0.000357301011827158	0.0028944817544652	0.00073774702846903	PPARA/PPARG/PTEN	3
NASH	GO:0030072	peptide hormone secretion	3/11	250/18670	0.000361523856531337	0.00290560892657481	0.000740583127935356	INS/TNF/IL6	3
NASH	GO:0010712	regulation of collagen metabolic process	2/11	49/18670	0.000365572161681815	0.00290560892657481	0.000740583127935356	IL6/PPARG	2
NASH	GO:0032757	positive regulation of interleukin-8 production	2/11	49/18670	0.000365572161681815	0.00290560892657481	0.000740583127935356	TNF/ADIPOQ	2
NASH	GO:0035094	response to nicotine	2/11	49/18670	0.000365572161681815	0.00290560892657481	0.000740583127935356	TNF/PPARA	2
NASH	GO:0014009	glial cell proliferation	2/11	50/18670	0.00038068194344804	0.00301149800333309	0.000767572191385225	TNF/IL6	2
NASH	GO:0050730	regulation of peptidyl-tyrosine phosphorylation	3/11	256/18670	0.000387541025316738	0.00305143283952666	0.000777750803390208	TNF/IL6/ADIPOQ	3
NASH	GO:0050999	regulation of nitric-oxide synthase activity	2/11	51/18670	0.000396092635728185	0.00310426088931159	0.000791215644441123	INS/TNF	2
NASH	GO:0072659	protein localization to plasma membrane	3/11	260/18670	0.000405541384497241	0.00316359830036042	0.000806339594906795	INS/TNF/ADIPOQ	3
NASH	GO:0015850	organic hydroxy compound transport	3/11	262/18670	0.000414740799592607	0.00322045275259697	0.00082083068752745	PON1/PPARG/ADIPOQ	3
NASH	GO:0032964	collagen biosynthetic process	2/11	53/18670	0.00042781557270481	0.00330673963306241	0.000842823532899868	IL6/PPARG	2
NASH	GO:0046883	regulation of hormone secretion	3/11	266/18670	0.000433542344303863	0.00333570251210963	0.00085020560670981	INS/TNF/ADIPOQ	3
NASH	GO:0050714	positive regulation of protein secretion	3/11	268/18670	0.000443146163644964	0.00338621891272343	0.000863081253406941	INS/TNF/IL6	3
NASH	GO:0051353	positive regulation of oxidoreductase activity	2/11	54/18670	0.000444127228315655	0.00338621891272343	0.000863081253406941	INS/TNF	2
NASH	GO:0043491	protein kinase B signaling	3/11	269/18670	0.000447999203432059	0.00340035431433793	0.000866684091988052	INS/TNF/PTEN	3
NASH	GO:0033344	cholesterol efflux	2/11	57/18670	0.000494859413128776	0.00372249156750888	0.000948790604119083	PON1/ADIPOQ	2
NASH	GO:0048008	platelet-derived growth factor receptor signaling pathway	2/11	57/18670	0.000494859413128776	0.00372249156750888	0.000948790604119083	PTEN/ADIPOQ	2
NASH	GO:0061900	NA	2/11	58/18670	0.00051236823447432	0.00383706877817435	0.000977994103698351	TNF/IL6	2
NASH	GO:0045824	negative regulation of innate immune response	2/11	59/18670	0.000530175613040203	0.00391964628958083	0.000999041503138515	INS/PPARG	2
NASH	GO:0045843	negative regulation of striated muscle tissue development	2/11	59/18670	0.000530175613040203	0.00391964628958083	0.000999041503138515	PPARA/PTEN	2
NASH	GO:0051348	negative regulation of transferase activity	3/11	285/18670	0.000530373503872065	0.00391964628958083	0.000999041503138515	PPARG/PTEN/ADIPOQ	3
NASH	GO:0002793	positive regulation of peptide secretion	3/11	288/18670	0.000546828647798695	0.00401675615458239	0.0010237929164889	INS/TNF/IL6	3
NASH	GO:0048635	negative regulation of muscle organ development	2/11	60/18670	0.000548281255521631	0.00401675615458239	0.0010237929164889	PPARA/PTEN	2
NASH	GO:0007162	negative regulation of cell adhesion	3/11	289/18670	0.000552385938809592	0.00402930868785352	0.00102699231275604	PPARA/PTEN/ADIPOQ	3
NASH	GO:0010803	regulation of tumor necrosis factor-mediated signaling pathway	2/11	61/18670	0.000566684868803924	0.00408061540142997	0.00104006939483581	TNF/ADIPOQ	2
NASH	GO:0032370	positive regulation of lipid transport	2/11	61/18670	0.000566684868803924	0.00408061540142997	0.00104006939483581	PON1/ADIPOQ	2
NASH	GO:0034113	heterotypic cell-cell adhesion	2/11	61/18670	0.000566684868803924	0.00408061540142997	0.00104006939483581	TNF/ADIPOQ	2
NASH	GO:0010676	positive regulation of cellular carbohydrate metabolic process	2/11	62/18670	0.000585386159962405	0.00416980871005213	0.00106280303214198	INS/PPARA	2
NASH	GO:1901862	negative regulation of muscle tissue development	2/11	62/18670	0.000585386159962405	0.00416980871005213	0.00106280303214198	PPARA/PTEN	2
NASH	GO:0050768	negative regulation of neurogenesis	3/11	295/18670	0.000586495349722466	0.00416980871005213	0.00106280303214198	TNF/IL6/PTEN	3
NASH	GO:0001818	negative regulation of cytokine production	3/11	296/18670	0.000592308806731389	0.00417590100143259	0.00106435583856598	TNF/IL6/ADIPOQ	3
NASH	GO:0050890	cognition	3/11	296/18670	0.000592308806731389	0.00417590100143259	0.00106435583856598	INS/TNF/PTEN	3
NASH	GO:0002637	regulation of immunoglobulin production	2/11	63/18670	0.00060438483626231	0.00424328520459164	0.00108153075962729	TNF/IL6	2
NASH	GO:0070372	regulation of ERK1 and ERK2 cascade	3/11	300/18670	0.00061593362821889	0.00430642391514038	0.00109762358730425	TNF/PTEN/ADIPOQ	3
NASH	GO:0032768	regulation of monooxygenase activity	2/11	64/18670	0.000623680605158699	0.00432469884647081	0.00110228151139159	INS/TNF	2
NASH	GO:0045600	positive regulation of fat cell differentiation	2/11	64/18670	0.000623680605158699	0.00432469884647081	0.00110228151139159	INS/PPARG	2
NASH	GO:0034599	cellular response to oxidative stress	3/11	302/18670	0.000627970037969533	0.00433659636876501	0.00110531395811721	INS/TNF/IL6	3
NASH	GO:1903037	regulation of leukocyte cell-cell adhesion	3/11	304/18670	0.000640156845567377	0.00440271136645319	0.00112216538342208	TNF/IL6/PPARA	3
NASH	GO:0014823	response to activity	2/11	65/18670	0.000643273174296348	0.0044061597507697	0.00112304430942623	PTEN/ADIPOQ	2
NASH	GO:0009895	negative regulation of catabolic process	3/11	308/18670	0.000664984834953378	0.0045364350076779	0.00115624893526946	INS/TNF/PPARA	3
NASH	GO:0042108	positive regulation of cytokine biosynthetic process	2/11	67/18670	0.000683347544822594	0.00462871883338983	0.00117977028519322	TNF/IL6	2
NASH	GO:1990778	protein localization to cell periphery	3/11	311/18670	0.000684006521966806	0.00462871883338983	0.00117977028519322	INS/TNF/ADIPOQ	3
NASH	GO:0034612	response to tumor necrosis factor	3/11	312/18670	0.000690423932939614	0.004653457308013	0.00118607564058679	TNF/GGT1/ADIPOQ	3
NASH	GO:0045806	negative regulation of endocytosis	2/11	68/18670	0.000703828762448504	0.00472490623396705	0.00120428658032707	PTEN/ADIPOQ	2
NASH	GO:0051961	negative regulation of nervous system development	3/11	315/18670	0.000709908086014095	0.00474680605132441	0.00120986841726713	TNF/IL6/PTEN	3
NASH	GO:0070371	ERK1 and ERK2 cascade	3/11	317/18670	0.00072309176634403	0.00481584832525569	0.00122746594827695	TNF/PTEN/ADIPOQ	3
NASH	GO:0050766	positive regulation of phagocytosis	2/11	70/18670	0.000745677804439389	0.00494672086803296	0.00126082281065591	TNF/PPARG	2
NASH	GO:0042531	positive regulation of tyrosine phosphorylation of STAT protein	2/11	71/18670	0.000767045046177443	0.00506851334434899	0.00129186534093043	TNF/IL6	2
NASH	GO:0051188	cofactor biosynthetic process	3/11	326/18670	0.00078436381533947	0.00514848996761497	0.00131224982463652	INS/GGT1/PPARA	3
NASH	GO:0006635	fatty acid beta-oxidation	2/11	72/18670	0.000788707046974442	0.00514848996761497	0.00131224982463652	PPARA/ADIPOQ	2
NASH	GO:0050805	negative regulation of synaptic transmission	2/11	72/18670	0.000788707046974442	0.00514848996761497	0.00131224982463652	PTEN/ADIPOQ	2
NASH	GO:0046677	response to antibiotic	3/11	327/18670	0.000791370268019155	0.00514848996761497	0.00131224982463652	IL6/PTEN/ADIPOQ	3
NASH	GO:0045685	regulation of glial cell differentiation	2/11	73/18670	0.00081066351598952	0.00524629115010292	0.00133717744135061	IL6/PPARG	2
NASH	GO:0032496	response to lipopolysaccharide	3/11	330/18670	0.000812630261232558	0.00524629115010292	0.00133717744135061	TNF/IL6/GGT1	3
NASH	GO:0032677	regulation of interleukin-8 production	2/11	74/18670	0.00083291416257067	0.00530459118108963	0.00135203698384168	TNF/ADIPOQ	2
NASH	GO:0070373	negative regulation of ERK1 and ERK2 cascade	2/11	74/18670	0.00083291416257067	0.00530459118108963	0.00135203698384168	PTEN/ADIPOQ	2
NASH	GO:0015849	organic acid transport	3/11	333/18670	0.000834253212456233	0.00530459118108963	0.00135203698384168	SLC17A5/PPARA/PPARG	3
NASH	GO:0046942	carboxylic acid transport	3/11	333/18670	0.000834253212456233	0.00530459118108963	0.00135203698384168	SLC17A5/PPARA/PPARG	3
NASH	GO:0030336	negative regulation of cell migration	3/11	334/18670	0.000841541964396287	0.00533082033837498	0.00135872228521443	PPARG/PTEN/ADIPOQ	3
NASH	GO:0150076	NA	2/11	75/18670	0.000855458696254661	0.00539868128535245	0.00137601871899035	TNF/IL6	2
NASH	GO:0007159	leukocyte cell-cell adhesion	3/11	337/18670	0.000863652852108487	0.00543005617836866	0.00138401556818642	TNF/IL6/PPARA	3
NASH	GO:0001937	negative regulation of endothelial cell proliferation	2/11	76/18670	0.000878296826766927	0.00550159908216458	0.00140225046104835	TNF/PPARG	2
NASH	GO:0002237	response to molecule of bacterial origin	3/11	343/18670	0.000908983959531925	0.00565180063399002	0.00144053391139649	TNF/IL6/GGT1	3
NASH	GO:0072330	monocarboxylic acid biosynthetic process	3/11	343/18670	0.000908983959531925	0.00565180063399002	0.00144053391139649	INS/PPARA/ADIPOQ	3
NASH	GO:0055021	regulation of cardiac muscle tissue growth	2/11	78/18670	0.00092485271812087	0.00572932658100613	0.00146029376545401	PPARA/PTEN	2
NASH	GO:0006110	regulation of glycolytic process	2/11	79/18670	0.000948569899355947	0.00585472630188561	0.00149225571211578	INS/PPARA	2
NASH	GO:2000146	negative regulation of cell motility	3/11	349/18670	0.000955811044965542	0.00587788909039029	0.00149815945580462	PPARG/PTEN/ADIPOQ	3
NASH	GO:0097061	dendritic spine organization	2/11	80/18670	0.000972579518205919	0.00595925995700718	0.00151889930498762	INS/PTEN	2
NASH	GO:0030811	regulation of nucleotide catabolic process	2/11	81/18670	0.000996881285338177	0.00606406124835678	0.0015456111131217	INS/PPARA	2
NASH	GO:0048708	astrocyte differentiation	2/11	81/18670	0.000996881285338177	0.00606406124835678	0.0015456111131217	TNF/IL6	2
NASH	GO:0032637	interleukin-8 production	2/11	82/18670	0.00102147491160822	0.00616912267404965	0.00157238922443371	TNF/ADIPOQ	2
NASH	GO:1905954	NA	2/11	82/18670	0.00102147491160822	0.00616912267404965	0.00157238922443371	PON1/ADIPOQ	2
NASH	GO:0001666	response to hypoxia	3/11	359/18670	0.00103723501316422	0.00623009463632633	0.00158792979017407	PPARA/PTEN/ADIPOQ	3
NASH	GO:0008652	cellular amino acid biosynthetic process	2/11	83/18670	0.00104636010805956	0.00623009463632633	0.00158792979017407	GPT/GGT1	2
NASH	GO:0042509	regulation of tyrosine phosphorylation of STAT protein	2/11	83/18670	0.00104636010805956	0.00623009463632633	0.00158792979017407	TNF/IL6	2
NASH	GO:0045913	positive regulation of carbohydrate metabolic process	2/11	83/18670	0.00104636010805956	0.00623009463632633	0.00158792979017407	INS/PPARA	2
NASH	GO:0018108	peptidyl-tyrosine phosphorylation	3/11	363/18670	0.00107100432731786	0.00626923315028224	0.00159790543514925	TNF/IL6/ADIPOQ	3
NASH	GO:0045862	positive regulation of proteolysis	3/11	363/18670	0.00107100432731786	0.00626923315028224	0.00159790543514925	TNF/PPARG/PTEN	3
NASH	GO:0002718	regulation of cytokine production involved in immune response	2/11	84/18670	0.00107153658592361	0.00626923315028224	0.00159790543514925	TNF/IL6	2
NASH	GO:0046889	positive regulation of lipid biosynthetic process	2/11	84/18670	0.00107153658592361	0.00626923315028224	0.00159790543514925	INS/TNF	2
NASH	GO:0060420	regulation of heart growth	2/11	84/18670	0.00107153658592361	0.00626923315028224	0.00159790543514925	PPARA/PTEN	2
NASH	GO:0006066	alcohol metabolic process	3/11	364/18670	0.00107955491221077	0.0062942907511251	0.00160429212960115	TNF/PON1/PTEN	3
NASH	GO:0006520	cellular amino acid metabolic process	3/11	366/18670	0.00109678662243803	0.00635080913679754	0.00161869756539959	INS/GPT/GGT1	3
NASH	GO:0018212	peptidyl-tyrosine modification	3/11	366/18670	0.00109678662243803	0.00635080913679754	0.00161869756539959	TNF/IL6/ADIPOQ	3
NASH	GO:0006919	activation of cysteine-type endopeptidase activity involved in apoptotic process	2/11	86/18670	0.00112276223175459	0.00641306562883552	0.00163456553275958	TNF/PPARG	2
NASH	GO:0007260	tyrosine phosphorylation of STAT protein	2/11	86/18670	0.00112276223175459	0.00641306562883552	0.00163456553275958	TNF/IL6	2
NASH	GO:0008625	extrinsic apoptotic signaling pathway via death domain receptors	2/11	86/18670	0.00112276223175459	0.00641306562883552	0.00163456553275958	TNF/PTEN	2
NASH	GO:0060291	long-term synaptic potentiation	2/11	86/18670	0.00112276223175459	0.00641306562883552	0.00163456553275958	INS/PTEN	2
NASH	GO:0036293	response to decreased oxygen levels	3/11	370/18670	0.00113177472457617	0.00644270409091502	0.0016421197995273	PPARA/PTEN/ADIPOQ	3
NASH	GO:0014068	positive regulation of phosphatidylinositol 3-kinase signaling	2/11	87/18670	0.00114881082312309	0.00651766409751651	0.00166122564534545	INS/TNF	2
NASH	GO:0043470	regulation of carbohydrate catabolic process	2/11	88/18670	0.00117514954270727	0.00655671185252236	0.00167117815763181	INS/PPARA	2
NASH	GO:0106027	NA	2/11	88/18670	0.00117514954270727	0.00655671185252236	0.00167117815763181	INS/PTEN	2
NASH	GO:1900407	regulation of cellular response to oxidative stress	2/11	88/18670	0.00117514954270727	0.00655671185252236	0.00167117815763181	INS/TNF	2
NASH	GO:1901888	regulation of cell junction assembly	2/11	88/18670	0.00117514954270727	0.00655671185252236	0.00167117815763181	TNF/PTEN	2
NASH	GO:1904035	regulation of epithelial cell apoptotic process	2/11	88/18670	0.00117514954270727	0.00655671185252236	0.00167117815763181	TNF/IL6	2
NASH	GO:0046427	positive regulation of JAK-STAT cascade	2/11	89/18670	0.00120177810267673	0.00665088665652516	0.00169518148109465	TNF/IL6	2
NASH	GO:0097306	cellular response to alcohol	2/11	89/18670	0.00120177810267673	0.00665088665652516	0.00169518148109465	PPARG/PTEN	2
NASH	GO:0050678	regulation of epithelial cell proliferation	3/11	378/18670	0.0012038696915372	0.00665088665652516	0.00169518148109465	TNF/PPARG/PTEN	3
NASH	GO:0010717	regulation of epithelial to mesenchymal transition	2/11	90/18670	0.00122869621538839	0.00673803575380296	0.00171739408874066	IL6/PTEN	2
NASH	GO:0071674	mononuclear cell migration	2/11	90/18670	0.00122869621538839	0.00673803575380296	0.00171739408874066	TNF/IL6	2
NASH	GO:0042176	regulation of protein catabolic process	3/11	381/18670	0.00123164095677823	0.00673803575380296	0.00171739408874066	INS/TNF/PTEN	3
NASH	GO:0051271	negative regulation of cellular component movement	3/11	384/18670	0.00125981719009575	0.00686987691039271	0.00175099783191643	PPARG/PTEN/ADIPOQ	3
NASH	GO:0045833	negative regulation of lipid metabolic process	2/11	92/18670	0.00128339994940224	0.00695346917923722	0.0017723038732649	INS/TNF	2
NASH	GO:1904894	positive regulation of STAT cascade	2/11	92/18670	0.00128339994940224	0.00695346917923722	0.0017723038732649	TNF/IL6	2
NASH	GO:0042116	macrophage activation	2/11	95/18670	0.00136762001567497	0.0073389800204214	0.00187056307876429	TNF/IL6	2
NASH	GO:0051196	regulation of coenzyme metabolic process	2/11	95/18670	0.00136762001567497	0.0073389800204214	0.00187056307876429	INS/PPARA	2
NASH	GO:1903076	regulation of protein localization to plasma membrane	2/11	95/18670	0.00136762001567497	0.0073389800204214	0.00187056307876429	INS/TNF	2
NASH	GO:0040013	negative regulation of locomotion	3/11	396/18670	0.00137661890429746	0.00736381858330544	0.00187689394470631	PPARG/PTEN/ADIPOQ	3
NASH	GO:0010660	regulation of muscle cell apoptotic process	2/11	96/18670	0.00139626941481509	0.00739847158479067	0.00188572631990916	PPARG/PTEN	2
NASH	GO:0032755	positive regulation of interleukin-6 production	2/11	96/18670	0.00139626941481509	0.00739847158479067	0.00188572631990916	TNF/IL6	2
NASH	GO:2001169	regulation of ATP biosynthetic process	2/11	96/18670	0.00139626941481509	0.00739847158479067	0.00188572631990916	INS/PPARA	2
NASH	GO:1903532	positive regulation of secretion by cell	3/11	399/18670	0.00140685520065042	0.00743119439841993	0.00189406672781842	INS/TNF/IL6	3
NASH	GO:0015908	fatty acid transport	2/11	97/18670	0.00142520635843379	0.00745798979490975	0.00190089635253673	PPARA/PPARG	2
NASH	GO:0048709	oligodendrocyte differentiation	2/11	97/18670	0.00142520635843379	0.00745798979490975	0.00190089635253673	PPARG/PTEN	2
NASH	GO:1902882	regulation of response to oxidative stress	2/11	97/18670	0.00142520635843379	0.00745798979490975	0.00190089635253673	INS/TNF	2
NASH	GO:0099175	NA	2/11	98/18670	0.00145443056038338	0.00758735447134984	0.00193386888915242	INS/PTEN	2
NASH	GO:2001233	regulation of apoptotic signaling pathway	3/11	406/18670	0.00147903987014722	0.00769192031233972	0.00196052068557527	INS/TNF/PTEN	3
NASH	GO:0050808	synapse organization	3/11	408/18670	0.00150008710513189	0.00777637566650779	0.00198204671056391	INS/TNF/PTEN	3
NASH	GO:0002824	positive regulation of adaptive immune response based on somatic recombination of immune receptors built from immunoglobulin superfamily domains	2/11	100/18670	0.00151373959561695	0.00777637566650779	0.00198204671056391	TNF/IL6	2
NASH	GO:0010657	muscle cell apoptotic process	2/11	100/18670	0.00151373959561695	0.00777637566650779	0.00198204671056391	PPARG/PTEN	2
NASH	GO:0055024	regulation of cardiac muscle tissue development	2/11	100/18670	0.00151373959561695	0.00777637566650779	0.00198204671056391	PPARA/PTEN	2
NASH	GO:0048661	positive regulation of smooth muscle cell proliferation	2/11	101/18670	0.00154382385753769	0.00785904290015408	0.00200311697845564	TNF/IL6	2
NASH	GO:0050830	defense response to Gram-positive bacterium	2/11	101/18670	0.00154382385753769	0.00785904290015408	0.00200311697845564	TNF/IL6	2
NASH	GO:1903426	regulation of reactive oxygen species biosynthetic process	2/11	101/18670	0.00154382385753769	0.00785904290015408	0.00200311697845564	INS/TNF	2
NASH	GO:0002367	cytokine production involved in immune response	2/11	102/18670	0.00157419423506267	0.00798950989783315	0.00203637047528716	TNF/IL6	2
NASH	GO:0001558	regulation of cell growth	3/11	416/18670	0.00158617527740735	0.00800211180368677	0.00203958245566403	INS/PPARA/PPARG	3
NASH	GO:0030099	myeloid cell differentiation	3/11	416/18670	0.00158617527740735	0.00800211180368677	0.00203958245566403	TNF/PPARG/ADIPOQ	3
NASH	GO:0032091	negative regulation of protein binding	2/11	103/18670	0.00160485044297578	0.0080648084886889	0.00205556261963771	PPARA/ADIPOQ	2
NASH	GO:0051222	positive regulation of protein transport	3/11	418/18670	0.00160817546124598	0.0080648084886889	0.00205556261963771	INS/TNF/IL6	3
NASH	GO:0071887	leukocyte apoptotic process	2/11	104/18670	0.00163579219624693	0.00817896098123463	0.00208465786683975	IL6/PTEN	2
NASH	GO:0002708	positive regulation of lymphocyte mediated immunity	2/11	105/18670	0.00166701921003195	0.00823732366247459	0.00209953337766024	TNF/IL6	2
NASH	GO:0002821	positive regulation of adaptive immune response	2/11	105/18670	0.00166701921003195	0.00823732366247459	0.00209953337766024	TNF/IL6	2
NASH	GO:0033138	positive regulation of peptidyl-serine phosphorylation	2/11	105/18670	0.00166701921003195	0.00823732366247459	0.00209953337766024	TNF/IL6	2
NASH	GO:0055017	cardiac muscle tissue growth	2/11	105/18670	0.00166701921003195	0.00823732366247459	0.00209953337766024	PPARA/PTEN	2
NASH	GO:0051047	positive regulation of secretion	3/11	428/18670	0.00172107824098588	0.00847958139199183	0.00216128015488532	INS/TNF/IL6	3
NASH	GO:0051341	regulation of oxidoreductase activity	2/11	107/18670	0.00173032788069613	0.00848689667452626	0.00216314467793641	INS/TNF	2
NASH	GO:0051052	regulation of DNA metabolic process	3/11	429/18670	0.00173263647242554	0.00848689667452626	0.00216314467793641	IL6/PPARG/ADIPOQ	3
NASH	GO:0009062	fatty acid catabolic process	2/11	108/18670	0.0017624089688158	0.00858282980478216	0.00218759616451733	PPARA/ADIPOQ	2
NASH	GO:2000278	regulation of DNA biosynthetic process	2/11	108/18670	0.0017624089688158	0.00858282980478216	0.00218759616451733	PPARG/ADIPOQ	2
NASH	GO:0050673	epithelial cell proliferation	3/11	434/18670	0.00179116490538719	0.00869773160108766	0.00221688239465486	TNF/PPARG/PTEN	3
NASH	GO:1904019	epithelial cell apoptotic process	2/11	111/18670	0.00186035583566507	0.00900775742268863	0.00229590193875181	TNF/IL6	2
NASH	GO:0060419	heart growth	2/11	112/18670	0.00189357171300976	0.00914231615020473	0.00233019833783135	PPARA/PTEN	2
NASH	GO:0046620	regulation of organ growth	2/11	113/18670	0.00192707057879751	0.00925103682414188	0.00235790912025606	PPARA/PTEN	2
NASH	GO:0048640	negative regulation of developmental growth	2/11	113/18670	0.00192707057879751	0.00925103682414188	0.00235790912025606	PPARA/PTEN	2
NASH	GO:0006690	icosanoid metabolic process	2/11	114/18670	0.00196085214985334	0.00930714330282502	0.00237220956898492	GGT1/PON1	2
NASH	GO:0010633	negative regulation of epithelial cell migration	2/11	114/18670	0.00196085214985334	0.00930714330282502	0.00237220956898492	PPARG/PTEN	2
NASH	GO:0042035	regulation of cytokine biosynthetic process	2/11	114/18670	0.00196085214985334	0.00930714330282502	0.00237220956898492	TNF/IL6	2
NASH	GO:0042752	regulation of circadian rhythm	2/11	114/18670	0.00196085214985334	0.00930714330282502	0.00237220956898492	PPARA/PPARG	2
NASH	GO:0006096	glycolytic process	2/11	115/18670	0.00199491614318731	0.00938947961248776	0.00239319549079807	INS/PPARA	2
NASH	GO:0032963	collagen metabolic process	2/11	115/18670	0.00199491614318731	0.00938947961248776	0.00239319549079807	IL6/PPARG	2
NASH	GO:1904375	regulation of protein localization to cell periphery	2/11	115/18670	0.00199491614318731	0.00938947961248776	0.00239319549079807	INS/TNF	2
NASH	GO:0006757	ATP generation from ADP	2/11	116/18670	0.00202926227599435	0.00952453185250831	0.00242761767660371	INS/PPARA	2
NASH	GO:1904951	positive regulation of establishment of protein localization	3/11	456/18670	0.00206350940590941	0.00960678203764466	0.00244858164695238	INS/TNF/IL6	3
NASH	GO:0002761	regulation of myeloid leukocyte differentiation	2/11	117/18670	0.00206389026565422	0.00960678203764466	0.00244858164695238	TNF/ADIPOQ	2
NASH	GO:1900371	regulation of purine nucleotide biosynthetic process	2/11	117/18670	0.00206389026565422	0.00960678203764466	0.00244858164695238	INS/PPARA	2
NASH	GO:0002697	regulation of immune effector process	3/11	458/18670	0.00208948380752682	0.00969911905146745	0.00247211655348975	INS/TNF/IL6	3
NASH	GO:0030808	regulation of nucleotide biosynthetic process	2/11	118/18670	0.0020987998297314	0.00971559811290495	0.0024763167453164	INS/PPARA	2
NASH	GO:0042866	pyruvate biosynthetic process	2/11	119/18670	0.00213399068597497	0.00982451996138749	0.0025040788032148	INS/PPARA	2
NASH	GO:0051193	regulation of cofactor metabolic process	2/11	119/18670	0.00213399068597497	0.00982451996138749	0.0025040788032148	INS/PPARA	2
NASH	GO:0002698	negative regulation of immune effector process	2/11	120/18670	0.00216946255231857	0.00996061144593129	0.00253876587220988	INS/TNF	2
NASH	GO:0042326	negative regulation of phosphorylation	3/11	468/18670	0.00222244802148242	0.0101761546635812	0.00259370364063166	PPARA/PTEN/ADIPOQ	3
NASH	GO:1903409	reactive oxygen species biosynthetic process	2/11	122/18670	0.00224124818796244	0.0102067653965316	0.00260150572030917	INS/TNF	2
NASH	GO:1903578	regulation of ATP metabolic process	2/11	122/18670	0.00224124818796244	0.0102067653965316	0.00260150572030917	INS/PPARA	2
NASH	GO:0050708	regulation of protein secretion	3/11	472/18670	0.00227708811168188	0.0103163735187561	0.00262944269601904	INS/TNF/IL6	3
NASH	GO:0042089	cytokine biosynthetic process	2/11	123/18670	0.00227756139405179	0.0103163735187561	0.00262944269601904	TNF/IL6	2
NASH	GO:0042107	cytokine metabolic process	2/11	124/18670	0.0023141544838191	0.0104540222660461	0.00266452668096005	TNF/IL6	2
NASH	GO:0045471	response to ethanol	2/11	125/18670	0.00235102717611928	0.010592194630377	0.00269974412568721	PTEN/ADIPOQ	2
NASH	GO:0016311	dephosphorylation	3/11	478/18670	0.00236062162332343	0.0106070598274666	0.00270353297492199	TNF/PON1/PTEN	3
NASH	GO:0045667	regulation of osteoblast differentiation	2/11	126/18670	0.00238817918999116	0.0106739573876263	0.00272058386016025	TNF/IL6	2
NASH	GO:0046031	ADP metabolic process	2/11	126/18670	0.00238817918999116	0.0106739573876263	0.00272058386016025	INS/PPARA	2
NASH	GO:0015711	organic anion transport	3/11	482/18670	0.0024173665131174	0.0107758269169387	0.00274654841924784	SLC17A5/PPARA/PPARG	3
NASH	GO:0045727	positive regulation of translation	2/11	127/18670	0.00242561024465748	0.0107840455468281	0.00274864318794682	TNF/IL6	2
NASH	GO:0016049	cell growth	3/11	484/18670	0.00244605750059962	0.0108373219328961	0.00276222230118483	INS/PPARA/PPARG	3
NASH	GO:0048871	multicellular organismal homeostasis	3/11	485/18670	0.00246048288775231	0.0108373219328961	0.00276222230118483	TNF/IL6/ADIPOQ	3
NASH	GO:0002687	positive regulation of leukocyte migration	2/11	128/18670	0.00246332005952476	0.0108373219328961	0.00276222230118483	TNF/IL6	2
NASH	GO:0034763	negative regulation of transmembrane transport	2/11	128/18670	0.00246332005952476	0.0108373219328961	0.00276222230118483	TNF/PTEN	2
NASH	GO:0043280	positive regulation of cysteine-type endopeptidase activity involved in apoptotic process	2/11	132/18670	0.00261694131556099	0.0114533665369358	0.00291924007313434	TNF/PPARG	2
NASH	GO:0072329	monocarboxylic acid catabolic process	2/11	132/18670	0.00261694131556099	0.0114533665369358	0.00291924007313434	PPARA/ADIPOQ	2
NASH	GO:0002705	positive regulation of leukocyte mediated immunity	2/11	133/18670	0.00265604072895674	0.0115943746846946	0.0029551803038297	TNF/IL6	2
NASH	GO:0002791	regulation of peptide secretion	3/11	500/18670	0.00268330766631537	0.0116455846679408	0.00296823273123213	INS/TNF/IL6	3
NASH	GO:0006165	nucleoside diphosphate phosphorylation	2/11	134/18670	0.00269541722284682	0.0116455846679408	0.00296823273123213	INS/PPARA	2
NASH	GO:0032355	response to estradiol	2/11	134/18670	0.00269541722284682	0.0116455846679408	0.00296823273123213	GGT1/PTEN	2
NASH	GO:0046683	response to organophosphorus	2/11	134/18670	0.00269541722284682	0.0116455846679408	0.00296823273123213	PTEN/ADIPOQ	2
NASH	GO:0046939	nucleotide phosphorylation	2/11	136/18670	0.00277500033505463	0.0119587610346984	0.00304805528793186	INS/PPARA	2
NASH	GO:0046425	regulation of JAK-STAT cascade	2/11	137/18670	0.00281520639530222	0.012101078510419	0.00308432924082521	TNF/IL6	2
NASH	GO:0009135	purine nucleoside diphosphate metabolic process	2/11	138/18670	0.00285568841990364	0.0121818607279434	0.00310491905481862	INS/PPARA	2
NASH	GO:0009179	purine ribonucleoside diphosphate metabolic process	2/11	138/18670	0.00285568841990364	0.0121818607279434	0.00310491905481862	INS/PPARA	2
NASH	GO:0046631	alpha-beta T cell activation	2/11	138/18670	0.00285568841990364	0.0121818607279434	0.00310491905481862	INS/IL6	2
NASH	GO:0002700	regulation of production of molecular mediator of immune response	2/11	139/18670	0.00289644613028093	0.0122625922852346	0.00312549595650521	TNF/IL6	2
NASH	GO:0033135	regulation of peptidyl-serine phosphorylation	2/11	139/18670	0.00289644613028093	0.0122625922852346	0.00312549595650521	TNF/IL6	2
NASH	GO:0050715	positive regulation of cytokine secretion	2/11	139/18670	0.00289644613028093	0.0122625922852346	0.00312549595650521	INS/TNF	2
NASH	GO:0001837	epithelial to mesenchymal transition	2/11	140/18670	0.00293747924803877	0.0123741313323633	0.00315392508736794	IL6/PTEN	2
NASH	GO:0009185	ribonucleoside diphosphate metabolic process	2/11	140/18670	0.00293747924803877	0.0123741313323633	0.00315392508736794	INS/PPARA	2
NASH	GO:0050709	negative regulation of protein secretion	2/11	141/18670	0.00297878749496443	0.012516850197045	0.00319030134649032	INS/TNF	2
NASH	GO:1900542	regulation of purine nucleotide metabolic process	2/11	142/18670	0.00302037059302765	0.01266001106779	0.00322679026435005	INS/PPARA	2
NASH	GO:0030534	adult behavior	2/11	144/18670	0.00310436023135774	0.0129797692055528	0.00330829038629739	PPARA/PTEN	2
NASH	GO:0002822	regulation of adaptive immune response based on somatic recombination of immune receptors built from immunoglobulin superfamily domains	2/11	145/18670	0.00314676621647569	0.0130921014191643	0.00333692167984947	TNF/IL6	2
NASH	GO:0071901	negative regulation of protein serine/threonine kinase activity	2/11	145/18670	0.00314676621647569	0.0130921014191643	0.00333692167984947	PTEN/ADIPOQ	2
NASH	GO:0006140	regulation of nucleotide metabolic process	2/11	146/18670	0.00318944594243326	0.013204462931204	0.00336556044100031	INS/PPARA	2
NASH	GO:1904892	regulation of STAT cascade	2/11	146/18670	0.00318944594243326	0.013204462931204	0.00336556044100031	TNF/IL6	2
NASH	GO:0019359	nicotinamide nucleotide biosynthetic process	2/11	147/18670	0.00323239913211122	0.0132843720429449	0.00338592771733345	INS/PPARA	2
NASH	GO:0019363	pyridine nucleotide biosynthetic process	2/11	147/18670	0.00323239913211122	0.0132843720429449	0.00338592771733345	INS/PPARA	2
NASH	GO:0071236	cellular response to antibiotic	2/11	147/18670	0.00323239913211122	0.0132843720429449	0.00338592771733345	IL6/PTEN	2
NASH	GO:0002792	negative regulation of peptide secretion	2/11	148/18670	0.00327562550857233	0.0134292675959717	0.00342285877192345	INS/TNF	2
NASH	GO:0002706	regulation of lymphocyte mediated immunity	2/11	149/18670	0.00331912479506113	0.0135089982600918	0.00344318056543336	TNF/IL6	2
NASH	GO:0051092	positive regulation of NF-kappaB transcription factor activity	2/11	149/18670	0.00331912479506113	0.0135089982600918	0.00344318056543336	INS/TNF	2
NASH	GO:2001056	positive regulation of cysteine-type endopeptidase activity	2/11	149/18670	0.00331912479506113	0.0135089982600918	0.00344318056543336	TNF/PPARG	2
NASH	GO:0072525	pyridine-containing compound biosynthetic process	2/11	150/18670	0.00336289671500395	0.0136541709994739	0.00348018226942705	INS/PPARA	2
NASH	GO:0055088	lipid homeostasis	2/11	151/18670	0.00340694099200876	0.0137997489700355	0.00351728725895641	INS/PPARG	2
NASH	GO:0016202	regulation of striated muscle tissue development	2/11	152/18670	0.00345125734986509	0.0139123651543605	0.00354599093111297	PPARA/PTEN	2
NASH	GO:0032675	regulation of interleukin-6 production	2/11	152/18670	0.00345125734986509	0.0139123651543605	0.00354599093111297	TNF/IL6	2
NASH	GO:0034250	positive regulation of cellular amide metabolic process	2/11	153/18670	0.00349584551254395	0.013991685721227	0.00356620819881968	TNF/IL6	2
NASH	GO:0045807	positive regulation of endocytosis	2/11	153/18670	0.00349584551254395	0.013991685721227	0.00356620819881968	TNF/PPARG	2
NASH	GO:0050729	positive regulation of inflammatory response	2/11	153/18670	0.00349584551254395	0.013991685721227	0.00356620819881968	TNF/IL6	2
NASH	GO:0006090	pyruvate metabolic process	2/11	154/18670	0.00354070520419772	0.0141376499267137	0.00360341163210943	INS/PPARA	2
NASH	GO:1901861	regulation of muscle tissue development	2/11	155/18670	0.00358583614916007	0.0142503158286196	0.00363212797630911	PPARA/PTEN	2
NASH	GO:2001236	regulation of extrinsic apoptotic signaling pathway	2/11	155/18670	0.00358583614916007	0.0142503158286196	0.00363212797630911	TNF/PTEN	2
NASH	GO:0007259	JAK-STAT cascade	2/11	156/18670	0.00363123807194586	0.0142958788580111	0.0036437411051498	TNF/IL6	2
NASH	GO:0030856	regulation of epithelial cell differentiation	2/11	156/18670	0.00363123807194586	0.0142958788580111	0.0036437411051498	TNF/ADIPOQ	2
NASH	GO:0048634	regulation of muscle organ development	2/11	156/18670	0.00363123807194586	0.0142958788580111	0.0036437411051498	PPARA/PTEN	2
NASH	GO:0051053	negative regulation of DNA metabolic process	2/11	156/18670	0.00363123807194586	0.0142958788580111	0.0036437411051498	PPARG/ADIPOQ	2
NASH	GO:0009132	nucleoside diphosphate metabolic process	2/11	158/18670	0.00372285374995263	0.0145883920201632	0.00371829701341658	INS/PPARA	2
NASH	GO:0043467	regulation of generation of precursor metabolites and energy	2/11	158/18670	0.00372285374995263	0.0145883920201632	0.00371829701341658	INS/PPARA	2
NASH	GO:0002819	regulation of adaptive immune response	2/11	160/18670	0.00381555003795733	0.0148824116063845	0.00379323687984062	TNF/IL6	2
NASH	GO:0006754	ATP biosynthetic process	2/11	160/18670	0.00381555003795733	0.0148824116063845	0.00379323687984062	INS/PPARA	2
NASH	GO:0032635	interleukin-6 production	2/11	161/18670	0.00386230272391864	0.0150299771127088	0.00383084845352815	TNF/IL6	2
NASH	GO:0015718	monocarboxylic acid transport	2/11	162/18670	0.00390932473859249	0.0151779082592819	0.00386855322179417	PPARA/PPARG	2
NASH	GO:0099173	NA	2/11	163/18670	0.00395661580775955	0.015326201462241	0.00390635027118184	INS/PTEN	2
NASH	GO:0097696	STAT cascade	2/11	166/18670	0.00410010060273277	0.0158455722834971	0.00403872777864551	TNF/IL6	2
NASH	GO:0033209	tumor necrosis factor-mediated signaling pathway	2/11	167/18670	0.00414846515128695	0.0159592780363437	0.0040677091605986	TNF/ADIPOQ	2
NASH	GO:1901568	fatty acid derivative metabolic process	2/11	167/18670	0.00414846515128695	0.0159592780363437	0.0040677091605986	GGT1/PON1	2
NASH	GO:0034614	cellular response to reactive oxygen species	2/11	168/18670	0.00419709738594265	0.0161095879164314	0.00410602022171107	TNF/IL6	2
NASH	GO:0051100	negative regulation of binding	2/11	169/18670	0.00424599703356188	0.0162602386398904	0.00414441815716088	PPARA/ADIPOQ	2
NASH	GO:0009206	purine ribonucleoside triphosphate biosynthetic process	2/11	171/18670	0.00434459747603858	0.0166001060025511	0.0042310437289026	INS/PPARA	2
NASH	GO:0009145	purine nucleoside triphosphate biosynthetic process	2/11	172/18670	0.00439429772551929	0.0167520173472851	0.0042697629721645	INS/PPARA	2
NASH	GO:0001659	temperature homeostasis	2/11	173/18670	0.00444426429720986	0.0169042558483039	0.00430856560119193	TNF/ADIPOQ	2
NASH	GO:0001936	regulation of endothelial cell proliferation	2/11	176/18670	0.00459575922404459	0.017401919758461	0.00443541043976391	TNF/PPARG	2
NASH	GO:0051897	positive regulation of protein kinase B signaling	2/11	176/18670	0.00459575922404459	0.017401919758461	0.00443541043976391	INS/TNF	2
NASH	GO:0009201	ribonucleoside triphosphate biosynthetic process	2/11	177/18670	0.00464678836397536	0.0175556914647948	0.0044746038529666	INS/PPARA	2
NASH	GO:0010950	positive regulation of endopeptidase activity	2/11	178/18670	0.00469808246671295	0.0177097739517032	0.0045138764780852	TNF/PPARG	2
NASH	GO:0051099	positive regulation of binding	2/11	179/18670	0.00474964126091438	0.0178641641175016	0.00455322752456078	PON1/PPARG	2
NASH	GO:1905330	NA	2/11	180/18670	0.00480146447541567	0.0180188588888094	0.0045926562090484	TNF/PTEN	2
NASH	GO:0022408	negative regulation of cell-cell adhesion	2/11	181/18670	0.00485355183923174	0.0181738552202344	0.00463216175533696	PPARA/ADIPOQ	2
NASH	GO:0009166	nucleotide catabolic process	2/11	182/18670	0.00490590308155635	0.0183291500940631	0.00467174339427002	INS/PPARA	2
NASH	GO:0009127	purine nucleoside monophosphate biosynthetic process	2/11	183/18670	0.00495851793176194	0.0184033099449755	0.00469064529598625	INS/PPARA	2
NASH	GO:0009168	purine ribonucleoside monophosphate biosynthetic process	2/11	183/18670	0.00495851793176194	0.0184033099449755	0.00469064529598625	INS/PPARA	2
NASH	GO:0043123	positive regulation of I-kappaB kinase/NF-kappaB signaling	2/11	183/18670	0.00495851793176194	0.0184033099449755	0.00469064529598625	TNF/ADIPOQ	2
NASH	GO:0043401	steroid hormone mediated signaling pathway	2/11	184/18670	0.00501139611939961	0.0185179878534832	0.0047198744614844	PPARA/PPARG	2
NASH	GO:0043409	negative regulation of MAPK cascade	2/11	184/18670	0.00501139611939961	0.0185179878534832	0.0047198744614844	PTEN/ADIPOQ	2
NASH	GO:0030308	negative regulation of cell growth	2/11	186/18670	0.00511794142606822	0.0188703091967723	0.00480967431034397	PPARA/PPARG	2
NASH	GO:0048167	regulation of synaptic plasticity	2/11	187/18670	0.00517160800509368	0.0189850969250171	0.00483893146675432	INS/PTEN	2
NASH	GO:1905475	NA	2/11	187/18670	0.00517160800509368	0.0189850969250171	0.00483893146675432	INS/TNF	2
NASH	GO:0009142	nucleoside triphosphate biosynthetic process	2/11	188/18670	0.00522553684154014	0.0190998472407703	0.0048681790874492	INS/PPARA	2
NASH	GO:1901292	nucleoside phosphate catabolic process	2/11	188/18670	0.00522553684154014	0.0190998472407703	0.0048681790874492	INS/PPARA	2
NASH	GO:0019362	pyridine nucleotide metabolic process	2/11	189/18670	0.00527972766585046	0.0192145596478575	0.00489741704596337	INS/PPARA	2
NASH	GO:0046496	nicotinamide nucleotide metabolic process	2/11	189/18670	0.00527972766585046	0.0192145596478575	0.00489741704596337	INS/PPARA	2
NASH	GO:0001935	endothelial cell proliferation	2/11	191/18670	0.00538889420072469	0.0195695834659937	0.00498790570303011	TNF/PPARG	2
NASH	GO:0002377	immunoglobulin production	2/11	193/18670	0.00549910545681967	0.019926866010196	0.00507897006538184	TNF/IL6	2
NASH	GO:0072524	pyridine-containing compound metabolic process	2/11	195/18670	0.00561035928408377	0.0200481627305295	0.00510988623711139	INS/PPARA	2
NASH	GO:2000377	regulation of reactive oxygen species metabolic process	2/11	195/18670	0.00561035928408377	0.0200481627305295	0.00510988623711139	INS/TNF	2
NASH	GO:0002685	regulation of leukocyte migration	2/11	196/18670	0.00566637649079033	0.0200481627305295	0.00510988623711139	TNF/IL6	2
NASH	GO:0071897	DNA biosynthetic process	2/11	196/18670	0.00566637649079033	0.0200481627305295	0.00510988623711139	PPARG/ADIPOQ	2
NASH	GO:0009156	ribonucleoside monophosphate biosynthetic process	2/11	197/18670	0.0057226535353075	0.0200481627305295	0.00510988623711139	INS/PPARA	2
NASH	GO:0009749	response to glucose	2/11	197/18670	0.0057226535353075	0.0200481627305295	0.00510988623711139	PTEN/ADIPOQ	2
NASH	GO:0010952	positive regulation of peptidase activity	2/11	197/18670	0.0057226535353075	0.0200481627305295	0.00510988623711139	TNF/PPARG	2
NASH	GO:0031099	regeneration	2/11	198/18670	0.00577919014967771	0.0200481627305295	0.00510988623711139	PPARG/PTEN	2
NASH	GO:0016052	carbohydrate catabolic process	2/11	199/18670	0.00583598606612064	0.0200481627305295	0.00510988623711139	INS/PPARA	2
NASH	GO:0001660	fever generation	1/11	10/18670	0.00587762159577543	0.0200481627305295	0.00510988623711139	TNF	1
NASH	GO:0006751	glutathione catabolic process	1/11	10/18670	0.00587762159577543	0.0200481627305295	0.00510988623711139	GGT1	1
NASH	GO:0010739	positive regulation of protein kinase A signaling	1/11	10/18670	0.00587762159577543	0.0200481627305295	0.00510988623711139	ADIPOQ	1
NASH	GO:0010749	regulation of nitric oxide mediated signal transduction	1/11	10/18670	0.00587762159577543	0.0200481627305295	0.00510988623711139	INS	1
NASH	GO:0032000	positive regulation of fatty acid beta-oxidation	1/11	10/18670	0.00587762159577543	0.0200481627305295	0.00510988623711139	PPARA	1
NASH	GO:0043471	regulation of cellular carbohydrate catabolic process	1/11	10/18670	0.00587762159577543	0.0200481627305295	0.00510988623711139	INS	1
NASH	GO:0045792	negative regulation of cell size	1/11	10/18670	0.00587762159577543	0.0200481627305295	0.00510988623711139	PTEN	1
NASH	GO:0070091	glucagon secretion	1/11	10/18670	0.00587762159577543	0.0200481627305295	0.00510988623711139	IL6	1
NASH	GO:0072015	glomerular visceral epithelial cell development	1/11	10/18670	0.00587762159577543	0.0200481627305295	0.00510988623711139	ADIPOQ	1
NASH	GO:0090154	positive regulation of sphingolipid biosynthetic process	1/11	10/18670	0.00587762159577543	0.0200481627305295	0.00510988623711139	TNF	1
NASH	GO:0090336	positive regulation of brown fat cell differentiation	1/11	10/18670	0.00587762159577543	0.0200481627305295	0.00510988623711139	INS	1
NASH	GO:0097050	type B pancreatic cell apoptotic process	1/11	10/18670	0.00587762159577543	0.0200481627305295	0.00510988623711139	IL6	1
NASH	GO:0097105	presynaptic membrane assembly	1/11	10/18670	0.00587762159577543	0.0200481627305295	0.00510988623711139	PTEN	1
NASH	GO:1900222	negative regulation of beta-amyloid clearance	1/11	10/18670	0.00587762159577543	0.0200481627305295	0.00510988623711139	TNF	1
NASH	GO:1901033	positive regulation of response to reactive oxygen species	1/11	10/18670	0.00587762159577543	0.0200481627305295	0.00510988623711139	TNF	1
NASH	GO:1901748	leukotriene D4 metabolic process	1/11	10/18670	0.00587762159577543	0.0200481627305295	0.00510988623711139	GGT1	1
NASH	GO:1901750	leukotriene D4 biosynthetic process	1/11	10/18670	0.00587762159577543	0.0200481627305295	0.00510988623711139	GGT1	1
NASH	GO:1990535	neuron projection maintenance	1/11	10/18670	0.00587762159577543	0.0200481627305295	0.00510988623711139	INS	1
NASH	GO:2000252	negative regulation of feeding behavior	1/11	10/18670	0.00587762159577543	0.0200481627305295	0.00510988623711139	INS	1
NASH	GO:2000304	positive regulation of ceramide biosynthetic process	1/11	10/18670	0.00587762159577543	0.0200481627305295	0.00510988623711139	TNF	1
NASH	GO:0002703	regulation of leukocyte mediated immunity	2/11	201/18670	0.00595035473498933	0.0202552479362768	0.00516266822302105	TNF/IL6	2
NASH	GO:0009746	response to hexose	2/11	202/18670	0.00600792695274003	0.0204099937809817	0.00520210992512294	PTEN/ADIPOQ	2
NASH	GO:0030278	regulation of ossification	2/11	203/18670	0.00606575740321316	0.0205649924032478	0.00524161605530228	TNF/IL6	2
NASH	GO:0034764	positive regulation of transmembrane transport	2/11	204/18670	0.00612384581951347	0.0206787178474553	0.00527060245619976	INS/ADIPOQ	2
NASH	GO:0035265	organ growth	2/11	204/18670	0.00612384581951347	0.0206787178474553	0.00527060245619976	PPARA/PTEN	2
NASH	GO:0071222	cellular response to lipopolysaccharide	2/11	205/18670	0.00618219193492235	0.0207848383958276	0.00529765051725609	TNF/IL6	2
NASH	GO:0002064	epithelial cell development	2/11	207/18670	0.00629965619707479	0.0207848383958276	0.00529765051725609	TNF/ADIPOQ	2
NASH	GO:0006733	oxidoreduction coenzyme metabolic process	2/11	207/18670	0.00629965619707479	0.0207848383958276	0.00529765051725609	INS/PPARA	2
NASH	GO:0034284	response to monosaccharide	2/11	207/18670	0.00629965619707479	0.0207848383958276	0.00529765051725609	PTEN/ADIPOQ	2
NASH	GO:0009124	nucleoside monophosphate biosynthetic process	2/11	208/18670	0.00635877381126404	0.0207848383958276	0.00529765051725609	INS/PPARA	2
NASH	GO:0090276	regulation of peptide hormone secretion	2/11	208/18670	0.00635877381126404	0.0207848383958276	0.00529765051725609	INS/TNF	2
NASH	GO:0071229	cellular response to acid chemical	2/11	209/18670	0.00641814805945316	0.0207848383958276	0.00529765051725609	TNF/PPARG	2
NASH	GO:0000185	activation of MAPKKK activity	1/11	11/18670	0.00646365300855412	0.0207848383958276	0.00529765051725609	TNF	1
NASH	GO:0002923	regulation of humoral immune response mediated by circulating immunoglobulin	1/11	11/18670	0.00646365300855412	0.0207848383958276	0.00529765051725609	TNF	1
NASH	GO:0031652	positive regulation of heat generation	1/11	11/18670	0.00646365300855412	0.0207848383958276	0.00529765051725609	TNF	1
NASH	GO:0032494	response to peptidoglycan	1/11	11/18670	0.00646365300855412	0.0207848383958276	0.00529765051725609	IL6	1
NASH	GO:0033860	regulation of NAD(P)H oxidase activity	1/11	11/18670	0.00646365300855412	0.0207848383958276	0.00529765051725609	INS	1
NASH	GO:0034115	negative regulation of heterotypic cell-cell adhesion	1/11	11/18670	0.00646365300855412	0.0207848383958276	0.00529765051725609	ADIPOQ	1
NASH	GO:0036462	TRAIL-activated apoptotic signaling pathway	1/11	11/18670	0.00646365300855412	0.0207848383958276	0.00529765051725609	PTEN	1
NASH	GO:0046886	positive regulation of hormone biosynthetic process	1/11	11/18670	0.00646365300855412	0.0207848383958276	0.00529765051725609	TNF	1
NASH	GO:0048853	forebrain morphogenesis	1/11	11/18670	0.00646365300855412	0.0207848383958276	0.00529765051725609	PTEN	1
NASH	GO:0051024	positive regulation of immunoglobulin secretion	1/11	11/18670	0.00646365300855412	0.0207848383958276	0.00529765051725609	IL6	1
NASH	GO:0051974	negative regulation of telomerase activity	1/11	11/18670	0.00646365300855412	0.0207848383958276	0.00529765051725609	PPARG	1
NASH	GO:0060736	prostate gland growth	1/11	11/18670	0.00646365300855412	0.0207848383958276	0.00529765051725609	PTEN	1
NASH	GO:0070587	regulation of cell-cell adhesion involved in gastrulation	1/11	11/18670	0.00646365300855412	0.0207848383958276	0.00529765051725609	ADIPOQ	1
NASH	GO:0071803	positive regulation of podosome assembly	1/11	11/18670	0.00646365300855412	0.0207848383958276	0.00529765051725609	TNF	1
NASH	GO:0072310	glomerular epithelial cell development	1/11	11/18670	0.00646365300855412	0.0207848383958276	0.00529765051725609	ADIPOQ	1
NASH	GO:0090193	positive regulation of glomerulus development	1/11	11/18670	0.00646365300855412	0.0207848383958276	0.00529765051725609	ADIPOQ	1
NASH	GO:0090394	negative regulation of excitatory postsynaptic potential	1/11	11/18670	0.00646365300855412	0.0207848383958276	0.00529765051725609	PTEN	1
NASH	GO:2000551	regulation of T-helper 2 cell cytokine production	1/11	11/18670	0.00646365300855412	0.0207848383958276	0.00529765051725609	IL6	1
NASH	GO:0050707	regulation of cytokine secretion	2/11	210/18670	0.00647777867580588	0.0207905848928246	0.00529911518742616	INS/TNF	2
NASH	GO:0071219	cellular response to molecule of bacterial origin	2/11	212/18670	0.00659780795053791	0.0211355634917422	0.00538704351374718	TNF/IL6	2
NASH	GO:0045732	positive regulation of protein catabolic process	2/11	214/18670	0.00671885951229229	0.0214825014766841	0.00547547124940628	TNF/PTEN	2
NASH	GO:0043281	regulation of cysteine-type endopeptidase activity involved in apoptotic process	2/11	215/18670	0.00677976798808264	0.0215184583959956	0.00548463596786893	TNF/PPARG	2
NASH	GO:0070374	positive regulation of ERK1 and ERK2 cascade	2/11	215/18670	0.00677976798808264	0.0215184583959956	0.00548463596786893	TNF/PTEN	2
NASH	GO:0002699	positive regulation of immune effector process	2/11	216/18670	0.00684093124071588	0.0215184583959956	0.00548463596786893	TNF/IL6	2
NASH	GO:0043393	regulation of protein binding	2/11	217/18670	0.00690234900558722	0.0215184583959956	0.00548463596786893	PPARA/ADIPOQ	2
NASH	GO:0044242	cellular lipid catabolic process	2/11	217/18670	0.00690234900558722	0.0215184583959956	0.00548463596786893	PPARA/ADIPOQ	2
NASH	GO:1903039	positive regulation of leukocyte cell-cell adhesion	2/11	218/18670	0.0069640210182674	0.0215184583959956	0.00548463596786893	TNF/IL6	2
NASH	GO:0048762	mesenchymal cell differentiation	2/11	219/18670	0.00702594701450265	0.0215184583959956	0.00548463596786893	IL6/PTEN	2
NASH	GO:0002863	positive regulation of inflammatory response to antigenic stimulus	1/11	12/18670	0.00704937034693742	0.0215184583959956	0.00548463596786893	TNF	1
NASH	GO:0033197	response to vitamin E	1/11	12/18670	0.00704937034693742	0.0215184583959956	0.00548463596786893	PPARG	1
NASH	GO:0042368	vitamin D biosynthetic process	1/11	12/18670	0.00704937034693742	0.0215184583959956	0.00548463596786893	TNF	1
NASH	GO:0045080	positive regulation of chemokine biosynthetic process	1/11	12/18670	0.00704937034693742	0.0215184583959956	0.00548463596786893	TNF	1
NASH	GO:0045416	positive regulation of interleukin-8 biosynthetic process	1/11	12/18670	0.00704937034693742	0.0215184583959956	0.00548463596786893	TNF	1
NASH	GO:0051798	positive regulation of hair follicle development	1/11	12/18670	0.00704937034693742	0.0215184583959956	0.00548463596786893	TNF	1
NASH	GO:0070586	cell-cell adhesion involved in gastrulation	1/11	12/18670	0.00704937034693742	0.0215184583959956	0.00548463596786893	ADIPOQ	1
NASH	GO:0071257	cellular response to electrical stimulus	1/11	12/18670	0.00704937034693742	0.0215184583959956	0.00548463596786893	PTEN	1
NASH	GO:0071639	positive regulation of monocyte chemotactic protein-1 production	1/11	12/18670	0.00704937034693742	0.0215184583959956	0.00548463596786893	ADIPOQ	1
NASH	GO:0072540	T-helper 17 cell lineage commitment	1/11	12/18670	0.00704937034693742	0.0215184583959956	0.00548463596786893	IL6	1
NASH	GO:0097090	presynaptic membrane organization	1/11	12/18670	0.00704937034693742	0.0215184583959956	0.00548463596786893	PTEN	1
NASH	GO:1900402	regulation of carbohydrate metabolic process by regulation of transcription from RNA polymerase II promoter	1/11	12/18670	0.00704937034693742	0.0215184583959956	0.00548463596786893	PPARA	1
NASH	GO:1902510	regulation of apoptotic DNA fragmentation	1/11	12/18670	0.00704937034693742	0.0215184583959956	0.00548463596786893	IL6	1
NASH	GO:1902950	regulation of dendritic spine maintenance	1/11	12/18670	0.00704937034693742	0.0215184583959956	0.00548463596786893	INS	1
NASH	GO:1904668	positive regulation of ubiquitin protein ligase activity	1/11	12/18670	0.00704937034693742	0.0215184583959956	0.00548463596786893	PTEN	1
NASH	GO:1905461	NA	1/11	12/18670	0.00704937034693742	0.0215184583959956	0.00548463596786893	PPARG	1
NASH	GO:2000121	regulation of removal of superoxide radicals	1/11	12/18670	0.00704937034693742	0.0215184583959956	0.00548463596786893	TNF	1
NASH	GO:2000341	regulation of chemokine (C-X-C motif) ligand 2 production	1/11	12/18670	0.00704937034693742	0.0215184583959956	0.00548463596786893	TNF	1
NASH	GO:1901605	alpha-amino acid metabolic process	2/11	222/18670	0.00721324626463119	0.0219788787629359	0.00560198815260212	GPT/GGT1	2
NASH	GO:0097191	extrinsic apoptotic signaling pathway	2/11	224/18670	0.00733937751239437	0.0221803341201512	0.00565333519976367	TNF/PTEN	2
NASH	GO:0001649	osteoblast differentiation	2/11	225/18670	0.00740282187044582	0.0221803341201512	0.00565333519976367	TNF/IL6	2
NASH	GO:0034404	nucleobase-containing small molecule biosynthetic process	2/11	226/18670	0.00746651836718157	0.0221803341201512	0.00565333519976367	INS/PPARA	2
NASH	GO:0002679	respiratory burst involved in defense response	1/11	13/18670	0.00763477376242594	0.0221803341201512	0.00565333519976367	INS	1
NASH	GO:0010642	negative regulation of platelet-derived growth factor receptor signaling pathway	1/11	13/18670	0.00763477376242594	0.0221803341201512	0.00565333519976367	ADIPOQ	1
NASH	GO:0030656	regulation of vitamin metabolic process	1/11	13/18670	0.00763477376242594	0.0221803341201512	0.00565333519976367	TNF	1
NASH	GO:0031650	regulation of heat generation	1/11	13/18670	0.00763477376242594	0.0221803341201512	0.00565333519976367	TNF	1
NASH	GO:0031953	negative regulation of protein autophosphorylation	1/11	13/18670	0.00763477376242594	0.0221803341201512	0.00565333519976367	ADIPOQ	1
NASH	GO:0032096	negative regulation of response to food	1/11	13/18670	0.00763477376242594	0.0221803341201512	0.00565333519976367	PPARA	1
NASH	GO:0032099	negative regulation of appetite	1/11	13/18670	0.00763477376242594	0.0221803341201512	0.00565333519976367	PPARA	1
NASH	GO:0035745	T-helper 2 cell cytokine production	1/11	13/18670	0.00763477376242594	0.0221803341201512	0.00565333519976367	IL6	1
NASH	GO:0042635	positive regulation of hair cycle	1/11	13/18670	0.00763477376242594	0.0221803341201512	0.00565333519976367	TNF	1
NASH	GO:0042711	maternal behavior	1/11	13/18670	0.00763477376242594	0.0221803341201512	0.00565333519976367	PTEN	1
NASH	GO:0045779	negative regulation of bone resorption	1/11	13/18670	0.00763477376242594	0.0221803341201512	0.00565333519976367	IL6	1
NASH	GO:0045820	negative regulation of glycolytic process	1/11	13/18670	0.00763477376242594	0.0221803341201512	0.00565333519976367	PPARA	1
NASH	GO:0048681	negative regulation of axon regeneration	1/11	13/18670	0.00763477376242594	0.0221803341201512	0.00565333519976367	PTEN	1
NASH	GO:0050872	white fat cell differentiation	1/11	13/18670	0.00763477376242594	0.0221803341201512	0.00565333519976367	PPARG	1
NASH	GO:0060100	positive regulation of phagocytosis, engulfment	1/11	13/18670	0.00763477376242594	0.0221803341201512	0.00565333519976367	PPARG	1
NASH	GO:0060746	parental behavior	1/11	13/18670	0.00763477376242594	0.0221803341201512	0.00565333519976367	PTEN	1
NASH	GO:0061000	negative regulation of dendritic spine development	1/11	13/18670	0.00763477376242594	0.0221803341201512	0.00565333519976367	PTEN	1
NASH	GO:0061052	negative regulation of cell growth involved in cardiac muscle cell development	1/11	13/18670	0.00763477376242594	0.0221803341201512	0.00565333519976367	PPARA	1
NASH	GO:0070208	protein heterotrimerization	1/11	13/18670	0.00763477376242594	0.0221803341201512	0.00565333519976367	ADIPOQ	1
NASH	GO:0071872	cellular response to epinephrine stimulus	1/11	13/18670	0.00763477376242594	0.0221803341201512	0.00565333519976367	ADIPOQ	1
NASH	GO:1901550	regulation of endothelial cell development	1/11	13/18670	0.00763477376242594	0.0221803341201512	0.00565333519976367	TNF	1
NASH	GO:1902894	negative regulation of pri-miRNA transcription from RNA polymerase II promoter	1/11	13/18670	0.00763477376242594	0.0221803341201512	0.00565333519976367	PPARA	1
NASH	GO:1903140	regulation of establishment of endothelial barrier	1/11	13/18670	0.00763477376242594	0.0221803341201512	0.00565333519976367	TNF	1
NASH	GO:1905155	NA	1/11	13/18670	0.00763477376242594	0.0221803341201512	0.00565333519976367	PPARG	1
NASH	GO:0009743	response to carbohydrate	2/11	230/18670	0.0077238204865227	0.0223619201370975	0.00569961793905094	PTEN/ADIPOQ	2
NASH	GO:2001234	negative regulation of apoptotic signaling pathway	2/11	230/18670	0.0077238204865227	0.0223619201370975	0.00569961793905094	INS/TNF	2
NASH	GO:0000302	response to reactive oxygen species	2/11	232/18670	0.00785397755240776	0.0226997464422077	0.00578572328497313	TNF/IL6	2
NASH	GO:0048738	cardiac muscle tissue development	2/11	233/18670	0.00791943166981849	0.0228497300747331	0.00582395119193573	PPARA/PTEN	2
NASH	GO:0071453	cellular response to oxygen levels	2/11	234/18670	0.00798513582797339	0.0229999211455302	0.00586223197087385	PPARG/PTEN	2
NASH	GO:0006469	negative regulation of protein kinase activity	2/11	235/18670	0.00805108976541408	0.0230715752631339	0.00588049520996947	PTEN/ADIPOQ	2
NASH	GO:0009755	hormone-mediated signaling pathway	2/11	235/18670	0.00805108976541408	0.0230715752631339	0.00588049520996947	PPARA/PPARG	2
NASH	GO:0046777	protein autophosphorylation	2/11	235/18670	0.00805108976541408	0.0230715752631339	0.00588049520996947	INS/ADIPOQ	2
NASH	GO:0071216	cellular response to biotic stimulus	2/11	236/18670	0.00811729322085612	0.0230841163997897	0.00588369170146132	TNF/IL6	2
NASH	GO:0043122	regulation of I-kappaB kinase/NF-kappaB signaling	2/11	237/18670	0.00818374593318893	0.0230841163997897	0.00588369170146132	TNF/ADIPOQ	2
NASH	GO:0036295	cellular response to increased oxygen levels	1/11	14/18670	0.00821986340645331	0.0230841163997897	0.00588369170146132	PPARG	1
NASH	GO:0046855	inositol phosphate dephosphorylation	1/11	14/18670	0.00821986340645331	0.0230841163997897	0.00588369170146132	PTEN	1
NASH	GO:0051547	regulation of keratinocyte migration	1/11	14/18670	0.00821986340645331	0.0230841163997897	0.00588369170146132	PTEN	1
NASH	GO:0071361	cellular response to ethanol	1/11	14/18670	0.00821986340645331	0.0230841163997897	0.00588369170146132	PTEN	1
NASH	GO:0072216	positive regulation of metanephros development	1/11	14/18670	0.00821986340645331	0.0230841163997897	0.00588369170146132	ADIPOQ	1
NASH	GO:0072567	chemokine (C-X-C motif) ligand 2 production	1/11	14/18670	0.00821986340645331	0.0230841163997897	0.00588369170146132	TNF	1
NASH	GO:0090069	regulation of ribosome biogenesis	1/11	14/18670	0.00821986340645331	0.0230841163997897	0.00588369170146132	PTEN	1
NASH	GO:1900121	negative regulation of receptor binding	1/11	14/18670	0.00821986340645331	0.0230841163997897	0.00588369170146132	ADIPOQ	1
NASH	GO:1902043	positive regulation of extrinsic apoptotic signaling pathway via death domain receptors	1/11	14/18670	0.00821986340645331	0.0230841163997897	0.00588369170146132	PTEN	1
NASH	GO:1903624	regulation of DNA catabolic process	1/11	14/18670	0.00821986340645331	0.0230841163997897	0.00588369170146132	IL6	1
NASH	GO:2000116	regulation of cysteine-type endopeptidase activity	2/11	239/18670	0.00831739808495336	0.0233191610202103	0.00594359999765474	TNF/PPARG	2
NASH	GO:0050663	cytokine secretion	2/11	240/18670	0.00838459700303235	0.0234685148672916	0.00598166738457283	INS/TNF	2
NASH	GO:0034329	cell junction assembly	2/11	241/18670	0.00845204413529667	0.023618066945232	0.00601978529667634	TNF/PTEN	2
NASH	GO:0030812	negative regulation of nucleotide catabolic process	1/11	15/18670	0.00880463943038789	0.0238135111399737	0.00606960021559223	PPARA	1
NASH	GO:0030852	regulation of granulocyte differentiation	1/11	15/18670	0.00880463943038789	0.0238135111399737	0.00606960021559223	ADIPOQ	1
NASH	GO:0032105	negative regulation of response to extracellular stimulus	1/11	15/18670	0.00880463943038789	0.0238135111399737	0.00606960021559223	PPARA	1
NASH	GO:0032108	negative regulation of response to nutrient levels	1/11	15/18670	0.00880463943038789	0.0238135111399737	0.00606960021559223	PPARA	1
NASH	GO:0032352	positive regulation of hormone metabolic process	1/11	15/18670	0.00880463943038789	0.0238135111399737	0.00606960021559223	TNF	1
NASH	GO:0042362	fat-soluble vitamin biosynthetic process	1/11	15/18670	0.00880463943038789	0.0238135111399737	0.00606960021559223	TNF	1
NASH	GO:0045410	positive regulation of interleukin-6 biosynthetic process	1/11	15/18670	0.00880463943038789	0.0238135111399737	0.00606960021559223	TNF	1
NASH	GO:0045475	locomotor rhythm	1/11	15/18670	0.00880463943038789	0.0238135111399737	0.00606960021559223	PTEN	1
NASH	GO:0046838	phosphorylated carbohydrate dephosphorylation	1/11	15/18670	0.00880463943038789	0.0238135111399737	0.00606960021559223	PTEN	1
NASH	GO:0046851	negative regulation of bone remodeling	1/11	15/18670	0.00880463943038789	0.0238135111399737	0.00606960021559223	IL6	1
NASH	GO:0051044	positive regulation of membrane protein ectodomain proteolysis	1/11	15/18670	0.00880463943038789	0.0238135111399737	0.00606960021559223	TNF	1
NASH	GO:0051198	negative regulation of coenzyme metabolic process	1/11	15/18670	0.00880463943038789	0.0238135111399737	0.00606960021559223	PPARA	1
NASH	GO:0055089	fatty acid homeostasis	1/11	15/18670	0.00880463943038789	0.0238135111399737	0.00606960021559223	INS	1
NASH	GO:0060099	regulation of phagocytosis, engulfment	1/11	15/18670	0.00880463943038789	0.0238135111399737	0.00606960021559223	PPARG	1
NASH	GO:0060134	prepulse inhibition	1/11	15/18670	0.00880463943038789	0.0238135111399737	0.00606960021559223	PTEN	1
NASH	GO:0070571	negative regulation of neuron projection regeneration	1/11	15/18670	0.00880463943038789	0.0238135111399737	0.00606960021559223	PTEN	1
NASH	GO:0071801	regulation of podosome assembly	1/11	15/18670	0.00880463943038789	0.0238135111399737	0.00606960021559223	TNF	1
NASH	GO:0090192	regulation of glomerulus development	1/11	15/18670	0.00880463943038789	0.0238135111399737	0.00606960021559223	ADIPOQ	1
NASH	GO:0090197	positive regulation of chemokine secretion	1/11	15/18670	0.00880463943038789	0.0238135111399737	0.00606960021559223	TNF	1
NASH	GO:1900119	positive regulation of execution phase of apoptosis	1/11	15/18670	0.00880463943038789	0.0238135111399737	0.00606960021559223	IL6	1
NASH	GO:0071383	cellular response to steroid hormone stimulus	2/11	250/18670	0.0090701950811468	0.0242276215093826	0.00617514888385326	PPARA/PPARG	2
NASH	GO:0045637	regulation of myeloid cell differentiation	2/11	251/18670	0.0091401100704924	0.0242276215093826	0.00617514888385326	TNF/ADIPOQ	2
NASH	GO:0001780	neutrophil homeostasis	1/11	16/18670	0.00938910198553522	0.0242276215093826	0.00617514888385326	IL6	1
NASH	GO:0002295	T-helper cell lineage commitment	1/11	16/18670	0.00938910198553522	0.0242276215093826	0.00617514888385326	IL6	1
NASH	GO:0002739	regulation of cytokine secretion involved in immune response	1/11	16/18670	0.00938910198553522	0.0242276215093826	0.00617514888385326	TNF	1
NASH	GO:0002830	positive regulation of type 2 immune response	1/11	16/18670	0.00938910198553522	0.0242276215093826	0.00617514888385326	IL6	1
NASH	GO:0014067	negative regulation of phosphatidylinositol 3-kinase signaling	1/11	16/18670	0.00938910198553522	0.0242276215093826	0.00617514888385326	PTEN	1
NASH	GO:0019372	lipoxygenase pathway	1/11	16/18670	0.00938910198553522	0.0242276215093826	0.00617514888385326	PON1	1
NASH	GO:0021542	dentate gyrus development	1/11	16/18670	0.00938910198553522	0.0242276215093826	0.00617514888385326	PTEN	1
NASH	GO:0034116	positive regulation of heterotypic cell-cell adhesion	1/11	16/18670	0.00938910198553522	0.0242276215093826	0.00617514888385326	TNF	1
NASH	GO:0043217	myelin maintenance	1/11	16/18670	0.00938910198553522	0.0242276215093826	0.00617514888385326	PTEN	1
NASH	GO:0045722	positive regulation of gluconeogenesis	1/11	16/18670	0.00938910198553522	0.0242276215093826	0.00617514888385326	PPARA	1
NASH	GO:0046325	negative regulation of glucose import	1/11	16/18670	0.00938910198553522	0.0242276215093826	0.00617514888385326	TNF	1
NASH	GO:0050774	negative regulation of dendrite morphogenesis	1/11	16/18670	0.00938910198553522	0.0242276215093826	0.00617514888385326	PTEN	1
NASH	GO:0060965	negative regulation of gene silencing by miRNA	1/11	16/18670	0.00938910198553522	0.0242276215093826	0.00617514888385326	PPARG	1
NASH	GO:0070293	renal absorption	1/11	16/18670	0.00938910198553522	0.0242276215093826	0.00617514888385326	ADIPOQ	1
NASH	GO:0070886	positive regulation of calcineurin-NFAT signaling cascade	1/11	16/18670	0.00938910198553522	0.0242276215093826	0.00617514888385326	TNF	1
NASH	GO:0071380	cellular response to prostaglandin E stimulus	1/11	16/18670	0.00938910198553522	0.0242276215093826	0.00617514888385326	PPARG	1
NASH	GO:0071545	inositol phosphate catabolic process	1/11	16/18670	0.00938910198553522	0.0242276215093826	0.00617514888385326	PTEN	1
NASH	GO:0071871	response to epinephrine	1/11	16/18670	0.00938910198553522	0.0242276215093826	0.00617514888385326	ADIPOQ	1
NASH	GO:0072224	metanephric glomerulus development	1/11	16/18670	0.00938910198553522	0.0242276215093826	0.00617514888385326	ADIPOQ	1
NASH	GO:0090153	regulation of sphingolipid biosynthetic process	1/11	16/18670	0.00938910198553522	0.0242276215093826	0.00617514888385326	TNF	1
NASH	GO:0090335	regulation of brown fat cell differentiation	1/11	16/18670	0.00938910198553522	0.0242276215093826	0.00617514888385326	INS	1
NASH	GO:0097091	synaptic vesicle clustering	1/11	16/18670	0.00938910198553522	0.0242276215093826	0.00617514888385326	PTEN	1
NASH	GO:0106058	NA	1/11	16/18670	0.00938910198553522	0.0242276215093826	0.00617514888385326	TNF	1
NASH	GO:1902004	positive regulation of beta-amyloid formation	1/11	16/18670	0.00938910198553522	0.0242276215093826	0.00617514888385326	TNF	1
NASH	GO:1905038	NA	1/11	16/18670	0.00938910198553522	0.0242276215093826	0.00617514888385326	TNF	1
NASH	GO:1905153	NA	1/11	16/18670	0.00938910198553522	0.0242276215093826	0.00617514888385326	PPARG	1
NASH	GO:2000303	regulation of ceramide biosynthetic process	1/11	16/18670	0.00938910198553522	0.0242276215093826	0.00617514888385326	TNF	1
NASH	GO:2001170	negative regulation of ATP biosynthetic process	1/11	16/18670	0.00938910198553522	0.0242276215093826	0.00617514888385326	PPARA	1
NASH	GO:0022409	positive regulation of cell-cell adhesion	2/11	255/18670	0.00942222105568241	0.0242759059309249	0.00618745564255339	TNF/IL6	2
NASH	GO:0033673	negative regulation of kinase activity	2/11	257/18670	0.00956474355241141	0.0246054853218522	0.00627145901066108	PTEN/ADIPOQ	2
NASH	GO:0009108	coenzyme biosynthetic process	2/11	261/18670	0.00985271225149644	0.0247495262311921	0.00630817223321966	INS/PPARA	2
NASH	GO:0000097	sulfur amino acid biosynthetic process	1/11	17/18670	0.00997325122313319	0.0247495262311921	0.00630817223321966	GGT1	1
NASH	GO:0006750	glutathione biosynthetic process	1/11	17/18670	0.00997325122313319	0.0247495262311921	0.00630817223321966	GGT1	1
NASH	GO:0009070	serine family amino acid biosynthetic process	1/11	17/18670	0.00997325122313319	0.0247495262311921	0.00630817223321966	GGT1	1
NASH	GO:0010715	regulation of extracellular matrix disassembly	1/11	17/18670	0.00997325122313319	0.0247495262311921	0.00630817223321966	IL6	1
NASH	GO:0031000	response to caffeine	1/11	17/18670	0.00997325122313319	0.0247495262311921	0.00630817223321966	PPARG	1
NASH	GO:0031649	heat generation	1/11	17/18670	0.00997325122313319	0.0247495262311921	0.00630817223321966	TNF	1
NASH	GO:0032460	negative regulation of protein oligomerization	1/11	17/18670	0.00997325122313319	0.0247495262311921	0.00630817223321966	INS	1
NASH	GO:0032740	positive regulation of interleukin-17 production	1/11	17/18670	0.00997325122313319	0.0247495262311921	0.00630817223321966	IL6	1
NASH	GO:0035313	wound healing, spreading of epidermal cells	1/11	17/18670	0.00997325122313319	0.0247495262311921	0.00630817223321966	PTEN	1
NASH	GO:0036270	response to diuretic	1/11	17/18670	0.00997325122313319	0.0247495262311921	0.00630817223321966	PPARG	1
NASH	GO:0042953	lipoprotein transport	1/11	17/18670	0.00997325122313319	0.0247495262311921	0.00630817223321966	PPARG	1
NASH	GO:0043373	CD4-positive, alpha-beta T cell lineage commitment	1/11	17/18670	0.00997325122313319	0.0247495262311921	0.00630817223321966	IL6	1
NASH	GO:0044872	lipoprotein localization	1/11	17/18670	0.00997325122313319	0.0247495262311921	0.00630817223321966	PPARG	1
NASH	GO:0045725	positive regulation of glycogen biosynthetic process	1/11	17/18670	0.00997325122313319	0.0247495262311921	0.00630817223321966	INS	1
NASH	GO:0048521	negative regulation of behavior	1/11	17/18670	0.00997325122313319	0.0247495262311921	0.00630817223321966	INS	1
NASH	GO:0060263	regulation of respiratory burst	1/11	17/18670	0.00997325122313319	0.0247495262311921	0.00630817223321966	INS	1
NASH	GO:0060850	regulation of transcription involved in cell fate commitment	1/11	17/18670	0.00997325122313319	0.0247495262311921	0.00630817223321966	PPARG	1
NASH	GO:0061318	renal filtration cell differentiation	1/11	17/18670	0.00997325122313319	0.0247495262311921	0.00630817223321966	ADIPOQ	1
NASH	GO:0070166	enamel mineralization	1/11	17/18670	0.00997325122313319	0.0247495262311921	0.00630817223321966	PPARA	1
NASH	GO:0072112	glomerular visceral epithelial cell differentiation	1/11	17/18670	0.00997325122313319	0.0247495262311921	0.00630817223321966	ADIPOQ	1
NASH	GO:0090185	negative regulation of kidney development	1/11	17/18670	0.00997325122313319	0.0247495262311921	0.00630817223321966	ADIPOQ	1
NASH	GO:0097107	postsynaptic density assembly	1/11	17/18670	0.00997325122313319	0.0247495262311921	0.00630817223321966	PTEN	1
NASH	GO:1904996	positive regulation of leukocyte adhesion to vascular endothelial cell	1/11	17/18670	0.00997325122313319	0.0247495262311921	0.00630817223321966	TNF	1
NASH	GO:0031330	negative regulation of cellular catabolic process	2/11	264/18670	0.0100712389224984	0.0249559376241322	0.00636078247736744	INS/PPARA	2
NASH	GO:0022898	regulation of transmembrane transporter activity	2/11	268/18670	0.010365994848324	0.0255584656479774	0.00651435513626412	INS/PTEN	2
NASH	GO:0007249	I-kappaB kinase/NF-kappaB signaling	2/11	269/18670	0.010440286950533	0.0255584656479774	0.00651435513626412	TNF/ADIPOQ	2
NASH	GO:0045165	cell fate commitment	2/11	270/18670	0.0105148197899409	0.0255584656479774	0.00651435513626412	IL6/PPARG	2
NASH	GO:0002902	regulation of B cell apoptotic process	1/11	18/18670	0.0105570872943574	0.0255584656479774	0.00651435513626412	PTEN	1
NASH	GO:0030809	negative regulation of nucleotide biosynthetic process	1/11	18/18670	0.0105570872943574	0.0255584656479774	0.00651435513626412	PPARA	1
NASH	GO:0031998	regulation of fatty acid beta-oxidation	1/11	18/18670	0.0105570872943574	0.0255584656479774	0.00651435513626412	PPARA	1
NASH	GO:0044320	cellular response to leptin stimulus	1/11	18/18670	0.0105570872943574	0.0255584656479774	0.00651435513626412	PTEN	1
NASH	GO:0051895	negative regulation of focal adhesion assembly	1/11	18/18670	0.0105570872943574	0.0255584656479774	0.00651435513626412	PTEN	1
NASH	GO:0070875	positive regulation of glycogen metabolic process	1/11	18/18670	0.0105570872943574	0.0255584656479774	0.00651435513626412	INS	1
NASH	GO:0071605	monocyte chemotactic protein-1 production	1/11	18/18670	0.0105570872943574	0.0255584656479774	0.00651435513626412	ADIPOQ	1
NASH	GO:0071637	regulation of monocyte chemotactic protein-1 production	1/11	18/18670	0.0105570872943574	0.0255584656479774	0.00651435513626412	ADIPOQ	1
NASH	GO:0072311	glomerular epithelial cell differentiation	1/11	18/18670	0.0105570872943574	0.0255584656479774	0.00651435513626412	ADIPOQ	1
NASH	GO:0090196	regulation of chemokine secretion	1/11	18/18670	0.0105570872943574	0.0255584656479774	0.00651435513626412	TNF	1
NASH	GO:1900221	regulation of beta-amyloid clearance	1/11	18/18670	0.0105570872943574	0.0255584656479774	0.00651435513626412	TNF	1
NASH	GO:1900372	negative regulation of purine nucleotide biosynthetic process	1/11	18/18670	0.0105570872943574	0.0255584656479774	0.00651435513626412	PPARA	1
NASH	GO:2000479	regulation of cAMP-dependent protein kinase activity	1/11	18/18670	0.0105570872943574	0.0255584656479774	0.00651435513626412	ADIPOQ	1
NASH	GO:1902105	regulation of leukocyte differentiation	2/11	272/18670	0.0106646066595169	0.0257817248511995	0.00657125955913752	TNF/ADIPOQ	2
NASH	GO:0043542	endothelial cell migration	2/11	273/18670	0.0107398601796934	0.0259264532991167	0.00660814802188949	PPARG/PTEN	2
NASH	GO:0060485	mesenchyme development	2/11	278/18670	0.0111197184499793	0.0260721228337293	0.00664527634931222	IL6/PTEN	2
NASH	GO:0002363	alpha-beta T cell lineage commitment	1/11	19/18670	0.0111406103503175	0.0260721228337293	0.00664527634931222	IL6	1
NASH	GO:0002544	chronic inflammatory response	1/11	19/18670	0.0111406103503175	0.0260721228337293	0.00664527634931222	TNF	1
NASH	GO:0002726	positive regulation of T cell cytokine production	1/11	19/18670	0.0111406103503175	0.0260721228337293	0.00664527634931222	IL6	1
NASH	GO:0002922	positive regulation of humoral immune response	1/11	19/18670	0.0111406103503175	0.0260721228337293	0.00664527634931222	TNF	1
NASH	GO:0006534	cysteine metabolic process	1/11	19/18670	0.0111406103503175	0.0260721228337293	0.00664527634931222	GGT1	1
NASH	GO:0010663	positive regulation of striated muscle cell apoptotic process	1/11	19/18670	0.0111406103503175	0.0260721228337293	0.00664527634931222	PTEN	1
NASH	GO:0010666	positive regulation of cardiac muscle cell apoptotic process	1/11	19/18670	0.0111406103503175	0.0260721228337293	0.00664527634931222	PTEN	1
NASH	GO:0019184	nonribosomal peptide biosynthetic process	1/11	19/18670	0.0111406103503175	0.0260721228337293	0.00664527634931222	GGT1	1
NASH	GO:0032095	regulation of response to food	1/11	19/18670	0.0111406103503175	0.0260721228337293	0.00664527634931222	PPARA	1
NASH	GO:0033189	response to vitamin A	1/11	19/18670	0.0111406103503175	0.0260721228337293	0.00664527634931222	PPARG	1
NASH	GO:0045414	regulation of interleukin-8 biosynthetic process	1/11	19/18670	0.0111406103503175	0.0260721228337293	0.00664527634931222	TNF	1
NASH	GO:0051546	keratinocyte migration	1/11	19/18670	0.0111406103503175	0.0260721228337293	0.00664527634931222	PTEN	1
NASH	GO:0060149	negative regulation of posttranscriptional gene silencing	1/11	19/18670	0.0111406103503175	0.0260721228337293	0.00664527634931222	PPARG	1
NASH	GO:0060967	negative regulation of gene silencing by RNA	1/11	19/18670	0.0111406103503175	0.0260721228337293	0.00664527634931222	PPARG	1
NASH	GO:0071800	podosome assembly	1/11	19/18670	0.0111406103503175	0.0260721228337293	0.00664527634931222	TNF	1
NASH	GO:1900409	positive regulation of cellular response to oxidative stress	1/11	19/18670	0.0111406103503175	0.0260721228337293	0.00664527634931222	TNF	1
NASH	GO:1902176	negative regulation of oxidative stress-induced intrinsic apoptotic signaling pathway	1/11	19/18670	0.0111406103503175	0.0260721228337293	0.00664527634931222	INS	1
NASH	GO:1905288	NA	1/11	19/18670	0.0111406103503175	0.0260721228337293	0.00664527634931222	PPARG	1
NASH	GO:1905459	NA	1/11	19/18670	0.0111406103503175	0.0260721228337293	0.00664527634931222	PPARG	1
NASH	GO:2000010	positive regulation of protein localization to cell surface	1/11	19/18670	0.0111406103503175	0.0260721228337293	0.00664527634931222	TNF	1
NASH	GO:2000696	regulation of epithelial cell differentiation involved in kidney development	1/11	19/18670	0.0111406103503175	0.0260721228337293	0.00664527634931222	ADIPOQ	1
NASH	GO:0009152	purine ribonucleotide biosynthetic process	2/11	280/18670	0.0112733326590078	0.0263096475490694	0.00670581677340017	INS/PPARA	2
NASH	GO:0030522	intracellular receptor signaling pathway	2/11	280/18670	0.0112733326590078	0.0263096475490694	0.00670581677340017	PPARA/PPARG	2
NASH	GO:0021700	developmental maturation	2/11	284/18670	0.011583414316899	0.0268041215920857	0.00683184857696141	PPARG/PTEN	2
NASH	GO:0072593	reactive oxygen species metabolic process	2/11	284/18670	0.011583414316899	0.0268041215920857	0.00683184857696141	INS/TNF	2
NASH	GO:0002374	cytokine secretion involved in immune response	1/11	20/18670	0.0117238205420577	0.0268041215920857	0.00683184857696141	TNF	1
NASH	GO:0010738	regulation of protein kinase A signaling	1/11	20/18670	0.0117238205420577	0.0268041215920857	0.00683184857696141	ADIPOQ	1
NASH	GO:0019370	leukotriene biosynthetic process	1/11	20/18670	0.0117238205420577	0.0268041215920857	0.00683184857696141	GGT1	1
NASH	GO:0034104	negative regulation of tissue remodeling	1/11	20/18670	0.0117238205420577	0.0268041215920857	0.00683184857696141	IL6	1
NASH	GO:0034393	positive regulation of smooth muscle cell apoptotic process	1/11	20/18670	0.0117238205420577	0.0268041215920857	0.00683184857696141	PPARG	1
NASH	GO:0042228	interleukin-8 biosynthetic process	1/11	20/18670	0.0117238205420577	0.0268041215920857	0.00683184857696141	TNF	1
NASH	GO:0043369	CD4-positive or CD8-positive, alpha-beta T cell lineage commitment	1/11	20/18670	0.0117238205420577	0.0268041215920857	0.00683184857696141	IL6	1
NASH	GO:0051797	regulation of hair follicle development	1/11	20/18670	0.0117238205420577	0.0268041215920857	0.00683184857696141	TNF	1
NASH	GO:0090195	chemokine secretion	1/11	20/18670	0.0117238205420577	0.0268041215920857	0.00683184857696141	TNF	1
NASH	GO:0097062	dendritic spine maintenance	1/11	20/18670	0.0117238205420577	0.0268041215920857	0.00683184857696141	INS	1
NASH	GO:0098698	NA	1/11	20/18670	0.0117238205420577	0.0268041215920857	0.00683184857696141	PTEN	1
NASH	GO:1902993	positive regulation of amyloid precursor protein catabolic process	1/11	20/18670	0.0117238205420577	0.0268041215920857	0.00683184857696141	TNF	1
NASH	GO:1903978	regulation of microglial cell activation	1/11	20/18670	0.0117238205420577	0.0268041215920857	0.00683184857696141	IL6	1
NASH	GO:0002440	production of molecular mediator of immune response	2/11	286/18670	0.0117398777157834	0.0268044633483671	0.00683193568398176	TNF/IL6	2
NASH	GO:0097193	intrinsic apoptotic signaling pathway	2/11	289/18670	0.0119763453417454	0.0273073638712327	0.00696011523314881	INS/TNF	2
NASH	GO:0034330	cell junction organization	2/11	290/18670	0.0120556395488338	0.0273572821433252	0.00697283842853455	TNF/PTEN	2
NASH	GO:0010632	regulation of epithelial cell migration	2/11	291/18670	0.0121351691685765	0.0273572821433252	0.00697283842853455	PPARG/PTEN	2
NASH	GO:0071356	cellular response to tumor necrosis factor	2/11	291/18670	0.0121351691685765	0.0273572821433252	0.00697283842853455	TNF/ADIPOQ	2
NASH	GO:0009410	response to xenobiotic stimulus	2/11	292/18670	0.0122149339492895	0.0273572821433252	0.00697283842853455	GGT1/PPARG	2
NASH	GO:0009260	ribonucleotide biosynthetic process	2/11	293/18670	0.0122949336394577	0.0273572821433252	0.00697283842853455	INS/PPARA	2
NASH	GO:0010829	negative regulation of glucose transport	1/11	21/18670	0.0123067180205582	0.0273572821433252	0.00697283842853455	TNF	1
NASH	GO:0010893	positive regulation of steroid biosynthetic process	1/11	21/18670	0.0123067180205582	0.0273572821433252	0.00697283842853455	TNF	1
NASH	GO:0032682	negative regulation of chemokine production	1/11	21/18670	0.0123067180205582	0.0273572821433252	0.00697283842853455	IL6	1
NASH	GO:0035357	peroxisome proliferator activated receptor signaling pathway	1/11	21/18670	0.0123067180205582	0.0273572821433252	0.00697283842853455	PPARG	1
NASH	GO:0035743	CD4-positive, alpha-beta T cell cytokine production	1/11	21/18670	0.0123067180205582	0.0273572821433252	0.00697283842853455	IL6	1
NASH	GO:0055093	response to hyperoxia	1/11	21/18670	0.0123067180205582	0.0273572821433252	0.00697283842853455	PPARG	1
NASH	GO:0060044	negative regulation of cardiac muscle cell proliferation	1/11	21/18670	0.0123067180205582	0.0273572821433252	0.00697283842853455	PTEN	1
NASH	GO:0072010	glomerular epithelium development	1/11	21/18670	0.0123067180205582	0.0273572821433252	0.00697283842853455	ADIPOQ	1
NASH	GO:1900273	positive regulation of long-term synaptic potentiation	1/11	21/18670	0.0123067180205582	0.0273572821433252	0.00697283842853455	INS	1
NASH	GO:1902884	positive regulation of response to oxidative stress	1/11	21/18670	0.0123067180205582	0.0273572821433252	0.00697283842853455	TNF	1
NASH	GO:1903055	positive regulation of extracellular matrix organization	1/11	21/18670	0.0123067180205582	0.0273572821433252	0.00697283842853455	IL6	1
NASH	GO:1903392	negative regulation of adherens junction organization	1/11	21/18670	0.0123067180205582	0.0273572821433252	0.00697283842853455	PTEN	1
NASH	GO:1904753	negative regulation of vascular associated smooth muscle cell migration	1/11	21/18670	0.0123067180205582	0.0273572821433252	0.00697283842853455	ADIPOQ	1
NASH	GO:2000810	regulation of bicellular tight junction assembly	1/11	21/18670	0.0123067180205582	0.0273572821433252	0.00697283842853455	TNF	1
NASH	GO:0018105	peptidyl-serine phosphorylation	2/11	299/18670	0.0127798508154399	0.0280963459875783	0.00716121140898451	TNF/IL6	2
NASH	GO:0006164	purine nucleotide biosynthetic process	2/11	300/18670	0.012861487843542	0.0280963459875783	0.00716121140898451	INS/PPARA	2
NASH	GO:0046390	ribose phosphate biosynthetic process	2/11	300/18670	0.012861487843542	0.0280963459875783	0.00716121140898451	INS/PPARA	2
NASH	GO:0005980	glycogen catabolic process	1/11	22/18670	0.0128893029367347	0.0280963459875783	0.00716121140898451	INS	1
NASH	GO:0006925	inflammatory cell apoptotic process	1/11	22/18670	0.0128893029367347	0.0280963459875783	0.00716121140898451	IL6	1
NASH	GO:0022010	central nervous system myelination	1/11	22/18670	0.0128893029367347	0.0280963459875783	0.00716121140898451	PTEN	1
NASH	GO:0032291	axon ensheathment in central nervous system	1/11	22/18670	0.0128893029367347	0.0280963459875783	0.00716121140898451	PTEN	1
NASH	GO:0042359	vitamin D metabolic process	1/11	22/18670	0.0128893029367347	0.0280963459875783	0.00716121140898451	TNF	1
NASH	GO:0044321	response to leptin	1/11	22/18670	0.0128893029367347	0.0280963459875783	0.00716121140898451	PTEN	1
NASH	GO:0045649	regulation of macrophage differentiation	1/11	22/18670	0.0128893029367347	0.0280963459875783	0.00716121140898451	ADIPOQ	1
NASH	GO:0046628	positive regulation of insulin receptor signaling pathway	1/11	22/18670	0.0128893029367347	0.0280963459875783	0.00716121140898451	INS	1
NASH	GO:0051195	negative regulation of cofactor metabolic process	1/11	22/18670	0.0128893029367347	0.0280963459875783	0.00716121140898451	PPARA	1
NASH	GO:0071379	cellular response to prostaglandin stimulus	1/11	22/18670	0.0128893029367347	0.0280963459875783	0.00716121140898451	PPARG	1
NASH	GO:0071404	cellular response to low-density lipoprotein particle stimulus	1/11	22/18670	0.0128893029367347	0.0280963459875783	0.00716121140898451	PPARG	1
NASH	GO:1904666	regulation of ubiquitin protein ligase activity	1/11	22/18670	0.0128893029367347	0.0280963459875783	0.00716121140898451	PTEN	1
NASH	GO:0046034	ATP metabolic process	2/11	305/18670	0.0132731615376782	0.0288957069651004	0.00736495295440322	INS/PPARA	2
NASH	GO:0007617	mating behavior	1/11	23/18670	0.0134715754414372	0.0289166937819384	0.00737030208529181	PTEN	1
NASH	GO:0009251	glucan catabolic process	1/11	23/18670	0.0134715754414372	0.0289166937819384	0.00737030208529181	INS	1
NASH	GO:0032098	regulation of appetite	1/11	23/18670	0.0134715754414372	0.0289166937819384	0.00737030208529181	PPARA	1
NASH	GO:0034695	response to prostaglandin E	1/11	23/18670	0.0134715754414372	0.0289166937819384	0.00737030208529181	PPARG	1
NASH	GO:0045821	positive regulation of glycolytic process	1/11	23/18670	0.0134715754414372	0.0289166937819384	0.00737030208529181	INS	1
NASH	GO:0048714	positive regulation of oligodendrocyte differentiation	1/11	23/18670	0.0134715754414372	0.0289166937819384	0.00737030208529181	PPARG	1
NASH	GO:0051043	regulation of membrane protein ectodomain proteolysis	1/11	23/18670	0.0134715754414372	0.0289166937819384	0.00737030208529181	TNF	1
NASH	GO:0060445	branching involved in salivary gland morphogenesis	1/11	23/18670	0.0134715754414372	0.0289166937819384	0.00737030208529181	TNF	1
NASH	GO:0072215	regulation of metanephros development	1/11	23/18670	0.0134715754414372	0.0289166937819384	0.00737030208529181	ADIPOQ	1
NASH	GO:0072243	metanephric nephron epithelium development	1/11	23/18670	0.0134715754414372	0.0289166937819384	0.00737030208529181	ADIPOQ	1
NASH	GO:2000726	negative regulation of cardiac muscle cell differentiation	1/11	23/18670	0.0134715754414372	0.0289166937819384	0.00737030208529181	PPARA	1
NASH	GO:0072522	purine-containing compound biosynthetic process	2/11	313/18670	0.0139438725873002	0.029711678331226	0.00757292816438558	INS/PPARA	2
NASH	GO:1901214	regulation of neuron death	2/11	313/18670	0.0139438725873002	0.029711678331226	0.00757292816438558	TNF/PPARA	2
NASH	GO:0001783	B cell apoptotic process	1/11	24/18670	0.0140535356854523	0.029711678331226	0.00757292816438558	PTEN	1
NASH	GO:0002861	regulation of inflammatory response to antigenic stimulus	1/11	24/18670	0.0140535356854523	0.029711678331226	0.00757292816438558	TNF	1
NASH	GO:0009110	vitamin biosynthetic process	1/11	24/18670	0.0140535356854523	0.029711678331226	0.00757292816438558	TNF	1
NASH	GO:0010640	regulation of platelet-derived growth factor receptor signaling pathway	1/11	24/18670	0.0140535356854523	0.029711678331226	0.00757292816438558	ADIPOQ	1
NASH	GO:0010804	negative regulation of tumor necrosis factor-mediated signaling pathway	1/11	24/18670	0.0140535356854523	0.029711678331226	0.00757292816438558	ADIPOQ	1
NASH	GO:0034505	tooth mineralization	1/11	24/18670	0.0140535356854523	0.029711678331226	0.00757292816438558	PPARA	1
NASH	GO:0046174	polyol catabolic process	1/11	24/18670	0.0140535356854523	0.029711678331226	0.00757292816438558	PTEN	1
NASH	GO:0050996	positive regulation of lipid catabolic process	1/11	24/18670	0.0140535356854523	0.029711678331226	0.00757292816438558	PPARA	1
NASH	GO:0071677	positive regulation of mononuclear cell migration	1/11	24/18670	0.0140535356854523	0.029711678331226	0.00757292816438558	TNF	1
NASH	GO:1900078	positive regulation of cellular response to insulin stimulus	1/11	24/18670	0.0140535356854523	0.029711678331226	0.00757292816438558	INS	1
NASH	GO:0006650	glycerophospholipid metabolic process	2/11	319/18670	0.0144565588389697	0.0301839470451137	0.00769330026200618	PON1/PTEN	2
NASH	GO:0006470	protein dephosphorylation	2/11	321/18670	0.0146292823495235	0.0301839470451137	0.00769330026200618	TNF/PTEN	2
NASH	GO:0002719	negative regulation of cytokine production involved in immune response	1/11	25/18670	0.0146351838195002	0.0301839470451137	0.00769330026200618	TNF	1
NASH	GO:0019430	removal of superoxide radicals	1/11	25/18670	0.0146351838195002	0.0301839470451137	0.00769330026200618	TNF	1
NASH	GO:0030813	positive regulation of nucleotide catabolic process	1/11	25/18670	0.0146351838195002	0.0301839470451137	0.00769330026200618	INS	1
NASH	GO:0032104	regulation of response to extracellular stimulus	1/11	25/18670	0.0146351838195002	0.0301839470451137	0.00769330026200618	PPARA	1
NASH	GO:0032107	regulation of response to nutrient levels	1/11	25/18670	0.0146351838195002	0.0301839470451137	0.00769330026200618	PPARA	1
NASH	GO:0044247	cellular polysaccharide catabolic process	1/11	25/18670	0.0146351838195002	0.0301839470451137	0.00769330026200618	INS	1
NASH	GO:0045662	negative regulation of myoblast differentiation	1/11	25/18670	0.0146351838195002	0.0301839470451137	0.00769330026200618	TNF	1
NASH	GO:0045672	positive regulation of osteoclast differentiation	1/11	25/18670	0.0146351838195002	0.0301839470451137	0.00769330026200618	TNF	1
NASH	GO:0046856	phosphatidylinositol dephosphorylation	1/11	25/18670	0.0146351838195002	0.0301839470451137	0.00769330026200618	PTEN	1
NASH	GO:0050901	leukocyte tethering or rolling	1/11	25/18670	0.0146351838195002	0.0301839470451137	0.00769330026200618	TNF	1
NASH	GO:0051197	positive regulation of coenzyme metabolic process	1/11	25/18670	0.0146351838195002	0.0301839470451137	0.00769330026200618	INS	1
NASH	GO:0060330	regulation of response to interferon-gamma	1/11	25/18670	0.0146351838195002	0.0301839470451137	0.00769330026200618	PPARG	1
NASH	GO:0060334	regulation of interferon-gamma-mediated signaling pathway	1/11	25/18670	0.0146351838195002	0.0301839470451137	0.00769330026200618	PPARG	1
NASH	GO:0061050	regulation of cell growth involved in cardiac muscle cell development	1/11	25/18670	0.0146351838195002	0.0301839470451137	0.00769330026200618	PPARA	1
NASH	GO:0072202	cell differentiation involved in metanephros development	1/11	25/18670	0.0146351838195002	0.0301839470451137	0.00769330026200618	ADIPOQ	1
NASH	GO:0097186	amelogenesis	1/11	25/18670	0.0146351838195002	0.0301839470451137	0.00769330026200618	PPARA	1
NASH	GO:1904861	excitatory synapse assembly	1/11	25/18670	0.0146351838195002	0.0301839470451137	0.00769330026200618	PTEN	1
NASH	GO:1905809	NA	1/11	25/18670	0.0146351838195002	0.0301839470451137	0.00769330026200618	PTEN	1
NASH	GO:0018209	peptidyl-serine modification	2/11	322/18670	0.014715985761047	0.0303134914515455	0.00772631860829646	TNF/IL6	2
NASH	GO:0032103	positive regulation of response to external stimulus	2/11	323/18670	0.0148029166146964	0.0304553290546561	0.00776247025100715	TNF/IL6	2
NASH	GO:1903829	positive regulation of cellular protein localization	2/11	324/18670	0.0148900746641504	0.0305972875720652	0.00779865271241768	INS/TNF	2
NASH	GO:0009615	response to virus	2/11	326/18670	0.0150650713660192	0.0309191781385413	0.00788069634891448	TNF/IL6	2
NASH	GO:0002360	T cell lineage commitment	1/11	26/18670	0.0152165199942379	0.0309286323163943	0.00788310603472676	IL6	1
NASH	GO:0006309	apoptotic DNA fragmentation	1/11	26/18670	0.0152165199942379	0.0309286323163943	0.00788310603472676	IL6	1
NASH	GO:0031645	negative regulation of neurological system process	1/11	26/18670	0.0152165199942379	0.0309286323163943	0.00788310603472676	PTEN	1
NASH	GO:0031954	positive regulation of protein autophosphorylation	1/11	26/18670	0.0152165199942379	0.0309286323163943	0.00788310603472676	INS	1
NASH	GO:0060074	synapse maturation	1/11	26/18670	0.0152165199942379	0.0309286323163943	0.00788310603472676	PTEN	1
NASH	GO:0072539	T-helper 17 cell differentiation	1/11	26/18670	0.0152165199942379	0.0309286323163943	0.00788310603472676	IL6	1
NASH	GO:1900120	regulation of receptor binding	1/11	26/18670	0.0152165199942379	0.0309286323163943	0.00788310603472676	ADIPOQ	1
NASH	GO:1903579	negative regulation of ATP metabolic process	1/11	26/18670	0.0152165199942379	0.0309286323163943	0.00788310603472676	PPARA	1
NASH	GO:0001655	urogenital system development	2/11	330/18670	0.0154177802997205	0.0312622861673032	0.00796814790333264	PTEN/ADIPOQ	2
NASH	GO:0042742	defense response to bacterium	2/11	330/18670	0.0154177802997205	0.0312622861673032	0.00796814790333264	TNF/IL6	2
NASH	GO:0008202	steroid metabolic process	2/11	331/18670	0.0155065218367649	0.0314044342487367	0.00800437868092117	TNF/PON1	2
NASH	GO:0032147	activation of protein kinase activity	2/11	333/18670	0.0156846803596583	0.0314643761785266	0.00801965671144079	INS/TNF	2
NASH	GO:0071902	positive regulation of protein serine/threonine kinase activity	2/11	334/18670	0.0157740968560152	0.0314643761785266	0.00801965671144079	TNF/ADIPOQ	2
NASH	GO:0000272	polysaccharide catabolic process	1/11	27/18670	0.0157975443602573	0.0314643761785266	0.00801965671144079	INS	1
NASH	GO:0001964	startle response	1/11	27/18670	0.0157975443602573	0.0314643761785266	0.00801965671144079	PTEN	1
NASH	GO:0009651	response to salt stress	1/11	27/18670	0.0157975443602573	0.0314643761785266	0.00801965671144079	TNF	1
NASH	GO:0035902	response to immobilization stress	1/11	27/18670	0.0157975443602573	0.0314643761785266	0.00801965671144079	PPARG	1
NASH	GO:0046885	regulation of hormone biosynthetic process	1/11	27/18670	0.0157975443602573	0.0314643761785266	0.00801965671144079	TNF	1
NASH	GO:0060259	regulation of feeding behavior	1/11	27/18670	0.0157975443602573	0.0314643761785266	0.00801965671144079	INS	1
NASH	GO:0071450	cellular response to oxygen radical	1/11	27/18670	0.0157975443602573	0.0314643761785266	0.00801965671144079	TNF	1
NASH	GO:0071451	cellular response to superoxide	1/11	27/18670	0.0157975443602573	0.0314643761785266	0.00801965671144079	TNF	1
NASH	GO:0072207	metanephric epithelium development	1/11	27/18670	0.0157975443602573	0.0314643761785266	0.00801965671144079	ADIPOQ	1
NASH	GO:1902175	regulation of oxidative stress-induced intrinsic apoptotic signaling pathway	1/11	27/18670	0.0157975443602573	0.0314643761785266	0.00801965671144079	INS	1
NASH	GO:1905208	NA	1/11	27/18670	0.0157975443602573	0.0314643761785266	0.00801965671144079	PPARA	1
NASH	GO:1905563	NA	1/11	27/18670	0.0157975443602573	0.0314643761785266	0.00801965671144079	PPARG	1
NASH	GO:0009205	purine ribonucleoside triphosphate metabolic process	2/11	335/18670	0.0158637378495935	0.0315589117787072	0.00804375199482277	INS/PPARA	2
NASH	GO:0043405	regulation of MAP kinase activity	2/11	337/18670	0.016043692351248	0.0318792707686945	0.00812540526230039	TNF/ADIPOQ	2
NASH	GO:0045930	negative regulation of mitotic cell cycle	2/11	338/18670	0.0161340053711543	0.0320209647236691	0.00816152029189878	TNF/PTEN	2
NASH	GO:0009167	purine ribonucleoside monophosphate metabolic process	2/11	340/18670	0.0163153017299372	0.032070289466418	0.008174092208214	INS/PPARA	2
NASH	GO:0036296	response to increased oxygen levels	1/11	28/18670	0.0163782570680853	0.032070289466418	0.008174092208214	PPARG	1
NASH	GO:0042634	regulation of hair cycle	1/11	28/18670	0.0163782570680853	0.032070289466418	0.008174092208214	TNF	1
NASH	GO:0045408	regulation of interleukin-6 biosynthetic process	1/11	28/18670	0.0163782570680853	0.032070289466418	0.008174092208214	TNF	1
NASH	GO:0048679	regulation of axon regeneration	1/11	28/18670	0.0163782570680853	0.032070289466418	0.008174092208214	PTEN	1
NASH	GO:0090344	negative regulation of cell aging	1/11	28/18670	0.0163782570680853	0.032070289466418	0.008174092208214	PTEN	1
NASH	GO:1900543	negative regulation of purine nucleotide metabolic process	1/11	28/18670	0.0163782570680853	0.032070289466418	0.008174092208214	PPARA	1
NASH	GO:1902003	regulation of beta-amyloid formation	1/11	28/18670	0.0163782570680853	0.032070289466418	0.008174092208214	TNF	1
NASH	GO:1902932	positive regulation of alcohol biosynthetic process	1/11	28/18670	0.0163782570680853	0.032070289466418	0.008174092208214	TNF	1
NASH	GO:1904994	regulation of leukocyte adhesion to vascular endothelial cell	1/11	28/18670	0.0163782570680853	0.032070289466418	0.008174092208214	TNF	1
NASH	GO:2000463	positive regulation of excitatory postsynaptic potential	1/11	28/18670	0.0163782570680853	0.032070289466418	0.008174092208214	PTEN	1
NASH	GO:0009126	purine nucleoside monophosphate metabolic process	2/11	341/18670	0.0164062845816334	0.032070289466418	0.008174092208214	INS/PPARA	2
NASH	GO:0009199	ribonucleoside triphosphate metabolic process	2/11	341/18670	0.0164062845816334	0.032070289466418	0.008174092208214	INS/PPARA	2
NASH	GO:0009144	purine nucleoside triphosphate metabolic process	2/11	342/18670	0.016497490223687	0.0322112062884272	0.00821000916175436	INS/PPARA	2
NASH	GO:0048638	regulation of developmental growth	2/11	347/18670	0.0169568517838273	0.0325830549394424	0.00830478614105419	PPARA/PTEN	2
NASH	GO:0000303	response to superoxide	1/11	29/18670	0.0169586582681845	0.0325830549394424	0.00830478614105419	TNF	1
NASH	GO:0005979	regulation of glycogen biosynthetic process	1/11	29/18670	0.0169586582681845	0.0325830549394424	0.00830478614105419	INS	1
NASH	GO:0007263	nitric oxide mediated signal transduction	1/11	29/18670	0.0169586582681845	0.0325830549394424	0.00830478614105419	INS	1
NASH	GO:0010575	positive regulation of vascular endothelial growth factor production	1/11	29/18670	0.0169586582681845	0.0325830549394424	0.00830478614105419	IL6	1
NASH	GO:0010962	regulation of glucan biosynthetic process	1/11	29/18670	0.0169586582681845	0.0325830549394424	0.00830478614105419	INS	1
NASH	GO:0042219	cellular modified amino acid catabolic process	1/11	29/18670	0.0169586582681845	0.0325830549394424	0.00830478614105419	GGT1	1
NASH	GO:0042226	interleukin-6 biosynthetic process	1/11	29/18670	0.0169586582681845	0.0325830549394424	0.00830478614105419	TNF	1
NASH	GO:0045980	negative regulation of nucleotide metabolic process	1/11	29/18670	0.0169586582681845	0.0325830549394424	0.00830478614105419	PPARA	1
NASH	GO:0060441	epithelial tube branching involved in lung morphogenesis	1/11	29/18670	0.0169586582681845	0.0325830549394424	0.00830478614105419	TNF	1
NASH	GO:0070102	interleukin-6-mediated signaling pathway	1/11	29/18670	0.0169586582681845	0.0325830549394424	0.00830478614105419	IL6	1
NASH	GO:0072538	T-helper 17 type immune response	1/11	29/18670	0.0169586582681845	0.0325830549394424	0.00830478614105419	IL6	1
NASH	GO:1901017	negative regulation of potassium ion transmembrane transporter activity	1/11	29/18670	0.0169586582681845	0.0325830549394424	0.00830478614105419	PTEN	1
NASH	GO:2000171	negative regulation of dendrite development	1/11	29/18670	0.0169586582681845	0.0325830549394424	0.00830478614105419	PTEN	1
NASH	GO:0070997	neuron death	2/11	348/18670	0.0170493890670337	0.0327200689953893	0.0083397083555326	TNF/PPARA	2
NASH	GO:0010631	epithelial cell migration	2/11	351/18670	0.0173283264980666	0.0332175542084666	0.00846650764769913	PPARG/PTEN	2
NASH	GO:0002449	lymphocyte mediated immunity	2/11	352/18670	0.0174217466960004	0.033317689477966	0.00849203017773551	TNF/IL6	2
NASH	GO:0000305	response to oxygen radical	1/11	30/18670	0.017538748110953	0.033317689477966	0.00849203017773551	TNF	1
NASH	GO:0002828	regulation of type 2 immune response	1/11	30/18670	0.017538748110953	0.033317689477966	0.00849203017773551	IL6	1
NASH	GO:0043171	peptide catabolic process	1/11	30/18670	0.017538748110953	0.033317689477966	0.00849203017773551	GGT1	1
NASH	GO:0045940	positive regulation of steroid metabolic process	1/11	30/18670	0.017538748110953	0.033317689477966	0.00849203017773551	TNF	1
NASH	GO:0045948	positive regulation of translational initiation	1/11	30/18670	0.017538748110953	0.033317689477966	0.00849203017773551	TNF	1
NASH	GO:0048147	negative regulation of fibroblast proliferation	1/11	30/18670	0.017538748110953	0.033317689477966	0.00849203017773551	PPARG	1
NASH	GO:0099068	NA	1/11	30/18670	0.017538748110953	0.033317689477966	0.00849203017773551	PTEN	1
NASH	GO:0009161	ribonucleoside monophosphate metabolic process	2/11	354/18670	0.0176092472237855	0.0333763572239355	0.00850698344361435	INS/PPARA	2
NASH	GO:0090132	epithelium migration	2/11	354/18670	0.0176092472237855	0.0333763572239355	0.00850698344361435	PPARG/PTEN	2
NASH	GO:0006959	humoral immune response	2/11	356/18670	0.0177976263191244	0.0336955060086793	0.00858832825334446	TNF/IL6	2
NASH	GO:0002724	regulation of T cell cytokine production	1/11	31/18670	0.018118526746725	0.0338842592322215	0.00863643777400992	IL6	1
NASH	GO:0006691	leukotriene metabolic process	1/11	31/18670	0.018118526746725	0.0338842592322215	0.00863643777400992	GGT1	1
NASH	GO:0010719	negative regulation of epithelial to mesenchymal transition	1/11	31/18670	0.018118526746725	0.0338842592322215	0.00863643777400992	PTEN	1
NASH	GO:0019098	reproductive behavior	1/11	31/18670	0.018118526746725	0.0338842592322215	0.00863643777400992	PTEN	1
NASH	GO:0033198	response to ATP	1/11	31/18670	0.018118526746725	0.0338842592322215	0.00863643777400992	PTEN	1
NASH	GO:0034694	response to prostaglandin	1/11	31/18670	0.018118526746725	0.0338842592322215	0.00863643777400992	PPARG	1
NASH	GO:0044319	wound healing, spreading of cells	1/11	31/18670	0.018118526746725	0.0338842592322215	0.00863643777400992	PTEN	1
NASH	GO:0048710	regulation of astrocyte differentiation	1/11	31/18670	0.018118526746725	0.0338842592322215	0.00863643777400992	IL6	1
NASH	GO:0060292	long term synaptic depression	1/11	31/18670	0.018118526746725	0.0338842592322215	0.00863643777400992	PTEN	1
NASH	GO:0090505	epiboly involved in wound healing	1/11	31/18670	0.018118526746725	0.0338842592322215	0.00863643777400992	PTEN	1
NASH	GO:0097106	postsynaptic density organization	1/11	31/18670	0.018118526746725	0.0338842592322215	0.00863643777400992	PTEN	1
NASH	GO:0090130	tissue migration	2/11	360/18670	0.0181770125042188	0.0339559490793889	0.00865471011987547	PPARG/PTEN	2
NASH	GO:0002460	adaptive immune response based on somatic recombination of immune receptors built from immunoglobulin superfamily domains	2/11	361/18670	0.0182724051463241	0.034096348473484	0.00869049519111759	TNF/IL6	2
NASH	GO:0009141	nucleoside triphosphate metabolic process	2/11	362/18670	0.0183680157463841	0.0342368435095766	0.0087263046396422	INS/PPARA	2
NASH	GO:0032228	regulation of synaptic transmission, GABAergic	1/11	32/18670	0.018697994325768	0.0345461846917973	0.00880514968249464	PTEN	1
NASH	GO:0045922	negative regulation of fatty acid metabolic process	1/11	32/18670	0.018697994325768	0.0345461846917973	0.00880514968249464	INS	1
NASH	GO:0046685	response to arsenic-containing substance	1/11	32/18670	0.018697994325768	0.0345461846917973	0.00880514968249464	PTEN	1
NASH	GO:0055094	response to lipoprotein particle	1/11	32/18670	0.018697994325768	0.0345461846917973	0.00880514968249464	PPARG	1
NASH	GO:0070570	regulation of neuron projection regeneration	1/11	32/18670	0.018697994325768	0.0345461846917973	0.00880514968249464	PTEN	1
NASH	GO:0071295	cellular response to vitamin	1/11	32/18670	0.018697994325768	0.0345461846917973	0.00880514968249464	PPARG	1
NASH	GO:0090504	epiboly	1/11	32/18670	0.018697994325768	0.0345461846917973	0.00880514968249464	PTEN	1
NASH	GO:2000778	positive regulation of interleukin-6 secretion	1/11	32/18670	0.018697994325768	0.0345461846917973	0.00880514968249464	TNF	1
NASH	GO:0030198	extracellular matrix organization	2/11	368/18670	0.0189462430405838	0.0349665055020631	0.00891228127118024	TNF/IL6	2
NASH	GO:0010737	protein kinase A signaling	1/11	33/18670	0.0192771509982874	0.0352681861369319	0.00898917378970372	ADIPOQ	1
NASH	GO:0030851	granulocyte differentiation	1/11	33/18670	0.0192771509982874	0.0352681861369319	0.00898917378970372	ADIPOQ	1
NASH	GO:0045736	negative regulation of cyclin-dependent protein serine/threonine kinase activity	1/11	33/18670	0.0192771509982874	0.0352681861369319	0.00898917378970372	PTEN	1
NASH	GO:0048854	brain morphogenesis	1/11	33/18670	0.0192771509982874	0.0352681861369319	0.00898917378970372	PTEN	1
NASH	GO:0051194	positive regulation of cofactor metabolic process	1/11	33/18670	0.0192771509982874	0.0352681861369319	0.00898917378970372	INS	1
NASH	GO:0051443	positive regulation of ubiquitin-protein transferase activity	1/11	33/18670	0.0192771509982874	0.0352681861369319	0.00898917378970372	PTEN	1
NASH	GO:0099084	NA	1/11	33/18670	0.0192771509982874	0.0352681861369319	0.00898917378970372	PTEN	1
NASH	GO:1901380	negative regulation of potassium ion transmembrane transport	1/11	33/18670	0.0192771509982874	0.0352681861369319	0.00898917378970372	PTEN	1
NASH	GO:0009123	nucleoside monophosphate metabolic process	2/11	375/18670	0.0196306787869118	0.0356688217492562	0.00909128800480808	INS/PPARA	2
NASH	GO:0000737	DNA catabolic process, endonucleolytic	1/11	34/18670	0.0198559969144227	0.0356688217492562	0.00909128800480808	IL6	1
NASH	GO:0006536	glutamate metabolic process	1/11	34/18670	0.0198559969144227	0.0356688217492562	0.00909128800480808	GGT1	1
NASH	GO:0007435	salivary gland morphogenesis	1/11	34/18670	0.0198559969144227	0.0356688217492562	0.00909128800480808	TNF	1
NASH	GO:0010574	regulation of vascular endothelial growth factor production	1/11	34/18670	0.0198559969144227	0.0356688217492562	0.00909128800480808	IL6	1
NASH	GO:0032148	activation of protein kinase B activity	1/11	34/18670	0.0198559969144227	0.0356688217492562	0.00909128800480808	INS	1
NASH	GO:0032660	regulation of interleukin-17 production	1/11	34/18670	0.0198559969144227	0.0356688217492562	0.00909128800480808	IL6	1
NASH	GO:0034205	beta-amyloid formation	1/11	34/18670	0.0198559969144227	0.0356688217492562	0.00909128800480808	TNF	1
NASH	GO:0043368	positive T cell selection	1/11	34/18670	0.0198559969144227	0.0356688217492562	0.00909128800480808	IL6	1
NASH	GO:0048566	embryonic digestive tract development	1/11	34/18670	0.0198559969144227	0.0356688217492562	0.00909128800480808	TNF	1
NASH	GO:0070050	neuron cellular homeostasis	1/11	34/18670	0.0198559969144227	0.0356688217492562	0.00909128800480808	IL6	1
NASH	GO:0070884	regulation of calcineurin-NFAT signaling cascade	1/11	34/18670	0.0198559969144227	0.0356688217492562	0.00909128800480808	TNF	1
NASH	GO:0071402	cellular response to lipoprotein particle stimulus	1/11	34/18670	0.0198559969144227	0.0356688217492562	0.00909128800480808	PPARG	1
NASH	GO:0071868	cellular response to monoamine stimulus	1/11	34/18670	0.0198559969144227	0.0356688217492562	0.00909128800480808	ADIPOQ	1
NASH	GO:0071870	cellular response to catecholamine stimulus	1/11	34/18670	0.0198559969144227	0.0356688217492562	0.00909128800480808	ADIPOQ	1
NASH	GO:0106056	NA	1/11	34/18670	0.0198559969144227	0.0356688217492562	0.00909128800480808	TNF	1
NASH	GO:1904030	negative regulation of cyclin-dependent protein kinase activity	1/11	34/18670	0.0198559969144227	0.0356688217492562	0.00909128800480808	PTEN	1
NASH	GO:0045765	regulation of angiogenesis	2/11	383/18670	0.0204257632049747	0.0363208721496426	0.00925748295302463	IL6/PPARG	2
NASH	GO:0002701	negative regulation of production of molecular mediator of immune response	1/11	35/18670	0.02043453222425	0.0363208721496426	0.00925748295302463	TNF	1
NASH	GO:0021955	central nervous system neuron axonogenesis	1/11	35/18670	0.02043453222425	0.0363208721496426	0.00925748295302463	PTEN	1
NASH	GO:0030262	apoptotic nuclear changes	1/11	35/18670	0.02043453222425	0.0363208721496426	0.00925748295302463	IL6	1
NASH	GO:0042092	type 2 immune response	1/11	35/18670	0.02043453222425	0.0363208721496426	0.00925748295302463	IL6	1
NASH	GO:0051354	negative regulation of oxidoreductase activity	1/11	35/18670	0.02043453222425	0.0363208721496426	0.00925748295302463	INS	1
NASH	GO:0070873	regulation of glycogen metabolic process	1/11	35/18670	0.02043453222425	0.0363208721496426	0.00925748295302463	INS	1
NASH	GO:0098801	regulation of renal system process	1/11	35/18670	0.02043453222425	0.0363208721496426	0.00925748295302463	ADIPOQ	1
NASH	GO:0110111	NA	1/11	35/18670	0.02043453222425	0.0363208721496426	0.00925748295302463	TNF	1
NASH	GO:1902991	regulation of amyloid precursor protein catabolic process	1/11	35/18670	0.02043453222425	0.0363208721496426	0.00925748295302463	TNF	1
NASH	GO:0009165	nucleotide biosynthetic process	2/11	386/18670	0.0207274362137414	0.0368026659854102	0.00938028281870834	INS/PPARA	2
NASH	GO:0010573	vascular endothelial growth factor production	1/11	36/18670	0.0210127570777799	0.0368817663292283	0.00940044395584892	IL6	1
NASH	GO:0030224	monocyte differentiation	1/11	36/18670	0.0210127570777799	0.0368817663292283	0.00940044395584892	PPARG	1
NASH	GO:0034390	smooth muscle cell apoptotic process	1/11	36/18670	0.0210127570777799	0.0368817663292283	0.00940044395584892	PPARG	1
NASH	GO:0034391	regulation of smooth muscle cell apoptotic process	1/11	36/18670	0.0210127570777799	0.0368817663292283	0.00940044395584892	PPARG	1
NASH	GO:0071709	membrane assembly	1/11	36/18670	0.0210127570777799	0.0368817663292283	0.00940044395584892	PTEN	1
NASH	GO:0090322	regulation of superoxide metabolic process	1/11	36/18670	0.0210127570777799	0.0368817663292283	0.00940044395584892	TNF	1
NASH	GO:0097242	beta-amyloid clearance	1/11	36/18670	0.0210127570777799	0.0368817663292283	0.00940044395584892	TNF	1
NASH	GO:1901099	negative regulation of signal transduction in absence of ligand	1/11	36/18670	0.0210127570777799	0.0368817663292283	0.00940044395584892	TNF	1
NASH	GO:1903131	mononuclear cell differentiation	1/11	36/18670	0.0210127570777799	0.0368817663292283	0.00940044395584892	PPARG	1
NASH	GO:2001171	positive regulation of ATP biosynthetic process	1/11	36/18670	0.0210127570777799	0.0368817663292283	0.00940044395584892	INS	1
NASH	GO:2001240	negative regulation of extrinsic apoptotic signaling pathway in absence of ligand	1/11	36/18670	0.0210127570777799	0.0368817663292283	0.00940044395584892	TNF	1
NASH	GO:0014706	striated muscle tissue development	2/11	390/18670	0.021132633919637	0.0370150604517551	0.00943441803174516	PPARA/PTEN	2
NASH	GO:1901293	nucleoside phosphate biosynthetic process	2/11	390/18670	0.021132633919637	0.0370150604517551	0.00943441803174516	INS/PPARA	2
NASH	GO:0002714	positive regulation of B cell mediated immunity	1/11	37/18670	0.02159067162496	0.0373898064625463	0.00952993349162511	TNF	1
NASH	GO:0002891	positive regulation of immunoglobulin mediated immune response	1/11	37/18670	0.02159067162496	0.0373898064625463	0.00952993349162511	TNF	1
NASH	GO:0006921	cellular component disassembly involved in execution phase of apoptosis	1/11	37/18670	0.02159067162496	0.0373898064625463	0.00952993349162511	IL6	1
NASH	GO:0007431	salivary gland development	1/11	37/18670	0.02159067162496	0.0373898064625463	0.00952993349162511	TNF	1
NASH	GO:0010614	negative regulation of cardiac muscle hypertrophy	1/11	37/18670	0.02159067162496	0.0373898064625463	0.00952993349162511	PPARA	1
NASH	GO:0014912	negative regulation of smooth muscle cell migration	1/11	37/18670	0.02159067162496	0.0373898064625463	0.00952993349162511	ADIPOQ	1
NASH	GO:0032885	regulation of polysaccharide biosynthetic process	1/11	37/18670	0.02159067162496	0.0373898064625463	0.00952993349162511	INS	1
NASH	GO:0043243	positive regulation of protein complex disassembly	1/11	37/18670	0.02159067162496	0.0373898064625463	0.00952993349162511	TNF	1
NASH	GO:0045730	respiratory burst	1/11	37/18670	0.02159067162496	0.0373898064625463	0.00952993349162511	INS	1
NASH	GO:0046839	phospholipid dephosphorylation	1/11	37/18670	0.02159067162496	0.0373898064625463	0.00952993349162511	PTEN	1
NASH	GO:1903427	negative regulation of reactive oxygen species biosynthetic process	1/11	37/18670	0.02159067162496	0.0373898064625463	0.00952993349162511	INS	1
NASH	GO:0001503	ossification	2/11	398/18670	0.021953145497418	0.037978490927258	0.00967997769690536	TNF/IL6	2
NASH	GO:0003298	physiological muscle hypertrophy	1/11	38/18670	0.0221682760156711	0.037999537219131	0.00968534198682207	PPARA	1
NASH	GO:0003301	physiological cardiac muscle hypertrophy	1/11	38/18670	0.0221682760156711	0.037999537219131	0.00968534198682207	PPARA	1
NASH	GO:0032094	response to food	1/11	38/18670	0.0221682760156711	0.037999537219131	0.00968534198682207	PPARA	1
NASH	GO:0032350	regulation of hormone metabolic process	1/11	38/18670	0.0221682760156711	0.037999537219131	0.00968534198682207	TNF	1
NASH	GO:0032620	interleukin-17 production	1/11	38/18670	0.0221682760156711	0.037999537219131	0.00968534198682207	IL6	1
NASH	GO:0061049	cell growth involved in cardiac muscle cell development	1/11	38/18670	0.0221682760156711	0.037999537219131	0.00968534198682207	PPARA	1
NASH	GO:0071867	response to monoamine	1/11	38/18670	0.0221682760156711	0.037999537219131	0.00968534198682207	ADIPOQ	1
NASH	GO:0071869	response to catecholamine	1/11	38/18670	0.0221682760156711	0.037999537219131	0.00968534198682207	ADIPOQ	1
NASH	GO:1904037	positive regulation of epithelial cell apoptotic process	1/11	38/18670	0.0221682760156711	0.037999537219131	0.00968534198682207	IL6	1
NASH	GO:0006732	coenzyme metabolic process	2/11	403/18670	0.0224727715127619	0.0384432690345215	0.00979844058477888	INS/PPARA	2
NASH	GO:0045785	positive regulation of cell adhesion	2/11	403/18670	0.0224727715127619	0.0384432690345215	0.00979844058477888	TNF/IL6	2
NASH	GO:0002251	organ or tissue specific immune response	1/11	39/18670	0.0227455703997326	0.0387134203268176	0.00986729688792227	IL6	1
NASH	GO:0014741	negative regulation of muscle hypertrophy	1/11	39/18670	0.0227455703997326	0.0387134203268176	0.00986729688792227	PPARA	1
NASH	GO:0045684	positive regulation of epidermis development	1/11	39/18670	0.0227455703997326	0.0387134203268176	0.00986729688792227	TNF	1
NASH	GO:0048713	regulation of oligodendrocyte differentiation	1/11	39/18670	0.0227455703997326	0.0387134203268176	0.00986729688792227	PPARG	1
NASH	GO:0060969	negative regulation of gene silencing	1/11	39/18670	0.0227455703997326	0.0387134203268176	0.00986729688792227	PPARG	1
NASH	GO:0060537	muscle tissue development	2/11	408/18670	0.022997598067279	0.0391028786512261	0.00996656223001734	PPARA/PTEN	2
NASH	GO:0007517	muscle organ development	2/11	410/18670	0.0232089783178093	0.0393378428947161	0.0100264500396965	PPARA/PTEN	2
NASH	GO:0002369	T cell cytokine production	1/11	40/18670	0.0233225549268969	0.0393378428947161	0.0100264500396965	IL6	1
NASH	GO:0007618	mating	1/11	40/18670	0.0233225549268969	0.0393378428947161	0.0100264500396965	PTEN	1
NASH	GO:0042036	negative regulation of cytokine biosynthetic process	1/11	40/18670	0.0233225549268969	0.0393378428947161	0.0100264500396965	IL6	1
NASH	GO:0045124	regulation of bone resorption	1/11	40/18670	0.0233225549268969	0.0393378428947161	0.0100264500396965	IL6	1
NASH	GO:0072210	metanephric nephron development	1/11	40/18670	0.0233225549268969	0.0393378428947161	0.0100264500396965	ADIPOQ	1
NASH	GO:0090184	positive regulation of kidney development	1/11	40/18670	0.0233225549268969	0.0393378428947161	0.0100264500396965	ADIPOQ	1
NASH	GO:2000008	regulation of protein localization to cell surface	1/11	40/18670	0.0233225549268969	0.0393378428947161	0.0100264500396965	TNF	1
NASH	GO:0046486	glycerolipid metabolic process	2/11	414/18670	0.0236342136754441	0.0398236500431233	0.0101502728206118	PON1/PTEN	2
NASH	GO:0006308	DNA catabolic process	1/11	41/18670	0.0238992297468542	0.039911003095589	0.0101725374124631	IL6	1
NASH	GO:0043267	negative regulation of potassium ion transport	1/11	41/18670	0.0238992297468542	0.039911003095589	0.0101725374124631	PTEN	1
NASH	GO:0044091	membrane biogenesis	1/11	41/18670	0.0238992297468542	0.039911003095589	0.0101725374124631	PTEN	1
NASH	GO:0061028	establishment of endothelial barrier	1/11	41/18670	0.0238992297468542	0.039911003095589	0.0101725374124631	TNF	1
NASH	GO:0090317	negative regulation of intracellular protein transport	1/11	41/18670	0.0238992297468542	0.039911003095589	0.0101725374124631	ADIPOQ	1
NASH	GO:0098815	modulation of excitatory postsynaptic potential	1/11	41/18670	0.0238992297468542	0.039911003095589	0.0101725374124631	PTEN	1
NASH	GO:1900117	regulation of execution phase of apoptosis	1/11	41/18670	0.0238992297468542	0.039911003095589	0.0101725374124631	IL6	1
NASH	GO:1902893	regulation of pri-miRNA transcription from RNA polymerase II promoter	1/11	41/18670	0.0238992297468542	0.039911003095589	0.0101725374124631	PPARA	1
NASH	GO:1903053	regulation of extracellular matrix organization	1/11	41/18670	0.0238992297468542	0.039911003095589	0.0101725374124631	IL6	1
NASH	GO:0002639	positive regulation of immunoglobulin production	1/11	42/18670	0.024475595009229	0.0405833690625232	0.010343910402942	IL6	1
NASH	GO:0006509	membrane protein ectodomain proteolysis	1/11	42/18670	0.024475595009229	0.0405833690625232	0.010343910402942	TNF	1
NASH	GO:0010470	regulation of gastrulation	1/11	42/18670	0.024475595009229	0.0405833690625232	0.010343910402942	ADIPOQ	1
NASH	GO:0031641	regulation of myelination	1/11	42/18670	0.024475595009229	0.0405833690625232	0.010343910402942	PTEN	1
NASH	GO:0051154	negative regulation of striated muscle cell differentiation	1/11	42/18670	0.024475595009229	0.0405833690625232	0.010343910402942	PPARA	1
NASH	GO:1901031	regulation of response to reactive oxygen species	1/11	42/18670	0.024475595009229	0.0405833690625232	0.010343910402942	TNF	1
NASH	GO:0043062	extracellular structure organization	2/11	422/18670	0.0244945319504962	0.0405833690625232	0.010343910402942	TNF/IL6	2
NASH	GO:1901342	regulation of vasculature development	2/11	422/18670	0.0244945319504962	0.0405833690625232	0.010343910402942	IL6/PPARG	2
NASH	GO:0006417	regulation of translation	2/11	424/18670	0.0247116523182531	0.0408635350485353	0.010415319256475	TNF/IL6	2
NASH	GO:0052548	regulation of endopeptidase activity	2/11	425/18670	0.0248205173552173	0.0408635350485353	0.010415319256475	TNF/PPARG	2
NASH	GO:0000096	sulfur amino acid metabolic process	1/11	43/18670	0.0250516508635827	0.0408635350485353	0.010415319256475	GGT1	1
NASH	GO:0001953	negative regulation of cell-matrix adhesion	1/11	43/18670	0.0250516508635827	0.0408635350485353	0.010415319256475	PTEN	1
NASH	GO:0006775	fat-soluble vitamin metabolic process	1/11	43/18670	0.0250516508635827	0.0408635350485353	0.010415319256475	TNF	1
NASH	GO:0008631	intrinsic apoptotic signaling pathway in response to oxidative stress	1/11	43/18670	0.0250516508635827	0.0408635350485353	0.010415319256475	INS	1
NASH	GO:0030866	cortical actin cytoskeleton organization	1/11	43/18670	0.0250516508635827	0.0408635350485353	0.010415319256475	TNF	1
NASH	GO:0032459	regulation of protein oligomerization	1/11	43/18670	0.0250516508635827	0.0408635350485353	0.010415319256475	INS	1
NASH	GO:0032881	regulation of polysaccharide metabolic process	1/11	43/18670	0.0250516508635827	0.0408635350485353	0.010415319256475	INS	1
NASH	GO:0033173	calcineurin-NFAT signaling cascade	1/11	43/18670	0.0250516508635827	0.0408635350485353	0.010415319256475	TNF	1
NASH	GO:0034383	low-density lipoprotein particle clearance	1/11	43/18670	0.0250516508635827	0.0408635350485353	0.010415319256475	ADIPOQ	1
NASH	GO:0045429	positive regulation of nitric oxide biosynthetic process	1/11	43/18670	0.0250516508635827	0.0408635350485353	0.010415319256475	TNF	1
NASH	GO:0045687	positive regulation of glial cell differentiation	1/11	43/18670	0.0250516508635827	0.0408635350485353	0.010415319256475	PPARG	1
NASH	GO:0050850	positive regulation of calcium-mediated signaling	1/11	43/18670	0.0250516508635827	0.0408635350485353	0.010415319256475	TNF	1
NASH	GO:0051602	response to electrical stimulus	1/11	43/18670	0.0250516508635827	0.0408635350485353	0.010415319256475	PTEN	1
NASH	GO:0099054	NA	1/11	43/18670	0.0250516508635827	0.0408635350485353	0.010415319256475	PTEN	1
NASH	GO:0001933	negative regulation of protein phosphorylation	2/11	429/18670	0.0252580044966373	0.0411602877919089	0.0104909557514283	PTEN/ADIPOQ	2
NASH	GO:0006644	phospholipid metabolic process	2/11	430/18670	0.0253678818833136	0.0412994019066506	0.0105264132299943	PON1/PTEN	2
NASH	GO:0048608	reproductive structure development	2/11	431/18670	0.0254779610522413	0.0413226456642186	0.0105323376111205	PPARG/PTEN	2
NASH	GO:0014003	oligodendrocyte development	1/11	44/18670	0.0256273974594116	0.0413226456642186	0.0105323376111205	PTEN	1
NASH	GO:0030225	macrophage differentiation	1/11	44/18670	0.0256273974594116	0.0413226456642186	0.0105323376111205	ADIPOQ	1
NASH	GO:0035850	epithelial cell differentiation involved in kidney development	1/11	44/18670	0.0256273974594116	0.0413226456642186	0.0105323376111205	ADIPOQ	1
NASH	GO:0042987	amyloid precursor protein catabolic process	1/11	44/18670	0.0256273974594116	0.0413226456642186	0.0105323376111205	TNF	1
NASH	GO:0045601	regulation of endothelial cell differentiation	1/11	44/18670	0.0256273974594116	0.0413226456642186	0.0105323376111205	TNF	1
NASH	GO:0061001	regulation of dendritic spine morphogenesis	1/11	44/18670	0.0256273974594116	0.0413226456642186	0.0105323376111205	PTEN	1
NASH	GO:0061756	leukocyte adhesion to vascular endothelial cell	1/11	44/18670	0.0256273974594116	0.0413226456642186	0.0105323376111205	TNF	1
NASH	GO:0070266	necroptotic process	1/11	44/18670	0.0256273974594116	0.0413226456642186	0.0105323376111205	TNF	1
NASH	GO:1904407	positive regulation of nitric oxide metabolic process	1/11	44/18670	0.0256273974594116	0.0413226456642186	0.0105323376111205	TNF	1
NASH	GO:0048732	gland development	2/11	434/18670	0.0258094069646854	0.0415366291647515	0.0105868778380251	TNF/PTEN	2
NASH	GO:0061458	reproductive system development	2/11	434/18670	0.0258094069646854	0.0415366291647515	0.0105868778380251	PPARG/PTEN	2
NASH	GO:0031018	endocrine pancreas development	1/11	45/18670	0.0262028349461475	0.0420093024588568	0.0107073530552638	IL6	1
NASH	GO:0044275	cellular carbohydrate catabolic process	1/11	45/18670	0.0262028349461475	0.0420093024588568	0.0107073530552638	INS	1
NASH	GO:0051932	synaptic transmission, GABAergic	1/11	45/18670	0.0262028349461475	0.0420093024588568	0.0107073530552638	PTEN	1
NASH	GO:1900271	regulation of long-term synaptic potentiation	1/11	45/18670	0.0262028349461475	0.0420093024588568	0.0107073530552638	INS	1
NASH	GO:0019932	second-messenger-mediated signaling	2/11	439/18670	0.0263658311340854	0.0422304424533593	0.0107637173331067	INS/TNF	2
NASH	GO:0002437	inflammatory response to antigenic stimulus	1/11	46/18670	0.0267779634731592	0.0424068312521365	0.0108086754026998	TNF	1
NASH	GO:0005978	glycogen biosynthetic process	1/11	46/18670	0.0267779634731592	0.0424068312521365	0.0108086754026998	INS	1
NASH	GO:0009250	glucan biosynthetic process	1/11	46/18670	0.0267779634731592	0.0424068312521365	0.0108086754026998	INS	1
NASH	GO:0030810	positive regulation of nucleotide biosynthetic process	1/11	46/18670	0.0267779634731592	0.0424068312521365	0.0108086754026998	INS	1
NASH	GO:0048512	circadian behavior	1/11	46/18670	0.0267779634731592	0.0424068312521365	0.0108086754026998	PTEN	1
NASH	GO:0071354	cellular response to interleukin-6	1/11	46/18670	0.0267779634731592	0.0424068312521365	0.0108086754026998	IL6	1
NASH	GO:0071675	regulation of mononuclear cell migration	1/11	46/18670	0.0267779634731592	0.0424068312521365	0.0108086754026998	TNF	1
NASH	GO:0097720	NA	1/11	46/18670	0.0267779634731592	0.0424068312521365	0.0108086754026998	TNF	1
NASH	GO:0099172	NA	1/11	46/18670	0.0267779634731592	0.0424068312521365	0.0108086754026998	PTEN	1
NASH	GO:1900373	positive regulation of purine nucleotide biosynthetic process	1/11	46/18670	0.0267779634731592	0.0424068312521365	0.0108086754026998	INS	1
NASH	GO:1904738	vascular associated smooth muscle cell migration	1/11	46/18670	0.0267779634731592	0.0424068312521365	0.0108086754026998	ADIPOQ	1
NASH	GO:1904752	regulation of vascular associated smooth muscle cell migration	1/11	46/18670	0.0267779634731592	0.0424068312521365	0.0108086754026998	ADIPOQ	1
NASH	GO:0007622	rhythmic behavior	1/11	47/18670	0.0273527831897503	0.0430742426866629	0.0109787855793587	PTEN	1
NASH	GO:0045058	T cell selection	1/11	47/18670	0.0273527831897503	0.0430742426866629	0.0109787855793587	IL6	1
NASH	GO:0050435	beta-amyloid metabolic process	1/11	47/18670	0.0273527831897503	0.0430742426866629	0.0109787855793587	TNF	1
NASH	GO:0120163	NA	1/11	47/18670	0.0273527831897503	0.0430742426866629	0.0109787855793587	ADIPOQ	1
NASH	GO:1903580	positive regulation of ATP metabolic process	1/11	47/18670	0.0273527831897503	0.0430742426866629	0.0109787855793587	INS	1
NASH	GO:2001239	regulation of extrinsic apoptotic signaling pathway in absence of ligand	1/11	47/18670	0.0273527831897503	0.0430742426866629	0.0109787855793587	TNF	1
NASH	GO:0045088	regulation of innate immune response	2/11	452/18670	0.0278358313712157	0.043451053373127	0.0110748272848576	INS/PPARG	2
NASH	GO:0052547	regulation of peptidase activity	2/11	452/18670	0.0278358313712157	0.043451053373127	0.0110748272848576	TNF/PPARG	2
NASH	GO:0002711	positive regulation of T cell mediated immunity	1/11	48/18670	0.0279272942451612	0.043451053373127	0.0110748272848576	IL6	1
NASH	GO:0002762	negative regulation of myeloid leukocyte differentiation	1/11	48/18670	0.0279272942451612	0.043451053373127	0.0110748272848576	ADIPOQ	1
NASH	GO:0009069	serine family amino acid metabolic process	1/11	48/18670	0.0279272942451612	0.043451053373127	0.0110748272848576	GGT1	1
NASH	GO:0030850	prostate gland development	1/11	48/18670	0.0279272942451612	0.043451053373127	0.0110748272848576	PTEN	1
NASH	GO:0030865	cortical cytoskeleton organization	1/11	48/18670	0.0279272942451612	0.043451053373127	0.0110748272848576	TNF	1
NASH	GO:0035272	exocrine system development	1/11	48/18670	0.0279272942451612	0.043451053373127	0.0110748272848576	TNF	1
NASH	GO:0046850	regulation of bone remodeling	1/11	48/18670	0.0279272942451612	0.043451053373127	0.0110748272848576	IL6	1
NASH	GO:0051972	regulation of telomerase activity	1/11	48/18670	0.0279272942451612	0.043451053373127	0.0110748272848576	PPARG	1
NASH	GO:0072604	interleukin-6 secretion	1/11	48/18670	0.0279272942451612	0.043451053373127	0.0110748272848576	TNF	1
NASH	GO:0101023	NA	1/11	48/18670	0.0279272942451612	0.043451053373127	0.0110748272848576	PPARG	1
NASH	GO:1905562	NA	1/11	48/18670	0.0279272942451612	0.043451053373127	0.0110748272848576	PPARG	1
NASH	GO:0043124	negative regulation of I-kappaB kinase/NF-kappaB signaling	1/11	49/18670	0.0285014967885669	0.0441406453021464	0.0112505908375922	ADIPOQ	1
NASH	GO:0097300	programmed necrotic cell death	1/11	49/18670	0.0285014967885669	0.0441406453021464	0.0112505908375922	TNF	1
NASH	GO:1904707	positive regulation of vascular smooth muscle cell proliferation	1/11	49/18670	0.0285014967885669	0.0441406453021464	0.0112505908375922	TNF	1
NASH	GO:1990090	cellular response to nerve growth factor stimulus	1/11	49/18670	0.0285014967885669	0.0441406453021464	0.0112505908375922	PTEN	1
NASH	GO:2001238	positive regulation of extrinsic apoptotic signaling pathway	1/11	49/18670	0.0285014967885669	0.0441406453021464	0.0112505908375922	PTEN	1
NASH	GO:0001667	ameboidal-type cell migration	2/11	461/18670	0.0288730353377442	0.0446749903986217	0.0113867849961816	PPARG/PTEN	2
NASH	GO:0009409	response to cold	1/11	50/18670	0.0290753909690797	0.0447415833633784	0.0114037582459837	PPARG	1
NASH	GO:0010718	positive regulation of epithelial to mesenchymal transition	1/11	50/18670	0.0290753909690797	0.0447415833633784	0.0114037582459837	IL6	1
NASH	GO:0042398	cellular modified amino acid biosynthetic process	1/11	50/18670	0.0290753909690797	0.0447415833633784	0.0114037582459837	GGT1	1
NASH	GO:0060425	lung morphogenesis	1/11	50/18670	0.0290753909690797	0.0447415833633784	0.0114037582459837	TNF	1
NASH	GO:0070741	response to interleukin-6	1/11	50/18670	0.0290753909690797	0.0447415833633784	0.0114037582459837	IL6	1
NASH	GO:2000725	regulation of cardiac muscle cell differentiation	1/11	50/18670	0.0290753909690797	0.0447415833633784	0.0114037582459837	PPARA	1
NASH	GO:0008544	epidermis development	2/11	464/18670	0.0292222837586687	0.0448856409602159	0.0114404757218604	TNF/PPARA	2
NASH	GO:0042110	T cell activation	2/11	464/18670	0.0292222837586687	0.0448856409602159	0.0114404757218604	INS/IL6	2
NASH	GO:0043254	regulation of protein complex assembly	2/11	467/18670	0.0295732789774091	0.0453344157320627	0.0115548596712051	INS/TNF	2
NASH	GO:0002712	regulation of B cell mediated immunity	1/11	51/18670	0.0296489769357466	0.0453344157320627	0.0115548596712051	TNF	1
NASH	GO:0002889	regulation of immunoglobulin mediated immune response	1/11	51/18670	0.0296489769357466	0.0453344157320627	0.0115548596712051	TNF	1
NASH	GO:0031103	axon regeneration	1/11	51/18670	0.0296489769357466	0.0453344157320627	0.0115548596712051	PTEN	1
NASH	GO:0045668	negative regulation of osteoblast differentiation	1/11	51/18670	0.0296489769357466	0.0453344157320627	0.0115548596712051	TNF	1
NASH	GO:0035176	social behavior	1/11	52/18670	0.0302222548375516	0.0460438511765592	0.0117356809495775	PTEN	1
NASH	GO:0051438	regulation of ubiquitin-protein transferase activity	1/11	52/18670	0.0302222548375516	0.0460438511765592	0.0117356809495775	PTEN	1
NASH	GO:0051703	intraspecies interaction between organisms	1/11	52/18670	0.0302222548375516	0.0460438511765592	0.0117356809495775	PTEN	1
NASH	GO:1990089	response to nerve growth factor	1/11	52/18670	0.0302222548375516	0.0460438511765592	0.0117356809495775	PTEN	1
NASH	GO:1903706	regulation of hemopoiesis	2/11	475/18670	0.0305177602931592	0.0464520560921167	0.011839724432662	TNF/ADIPOQ	2
NASH	GO:0010043	response to zinc ion	1/11	53/18670	0.0307952248234139	0.0465798508325426	0.0118722968231625	PTEN	1
NASH	GO:0031638	zymogen activation	1/11	53/18670	0.0307952248234139	0.0465798508325426	0.0118722968231625	GGT1	1
NASH	GO:0032715	negative regulation of interleukin-6 production	1/11	53/18670	0.0307952248234139	0.0465798508325426	0.0118722968231625	TNF	1
NASH	GO:0045661	regulation of myoblast differentiation	1/11	53/18670	0.0307952248234139	0.0465798508325426	0.0118722968231625	TNF	1
NASH	GO:0045840	positive regulation of mitotic nuclear division	1/11	53/18670	0.0307952248234139	0.0465798508325426	0.0118722968231625	INS	1
NASH	GO:0070228	regulation of lymphocyte apoptotic process	1/11	53/18670	0.0307952248234139	0.0465798508325426	0.0118722968231625	PTEN	1
NASH	GO:0071320	cellular response to cAMP	1/11	53/18670	0.0307952248234139	0.0465798508325426	0.0118722968231625	ADIPOQ	1
NASH	GO:0002720	positive regulation of cytokine production involved in immune response	1/11	54/18670	0.0313678870421894	0.047234039022421	0.0120390366522866	IL6	1
NASH	GO:0002763	positive regulation of myeloid leukocyte differentiation	1/11	54/18670	0.0313678870421894	0.047234039022421	0.0120390366522866	TNF	1
NASH	GO:0046164	alcohol catabolic process	1/11	54/18670	0.0313678870421894	0.047234039022421	0.0120390366522866	PTEN	1
NASH	GO:0061005	cell differentiation involved in kidney development	1/11	54/18670	0.0313678870421894	0.047234039022421	0.0120390366522866	ADIPOQ	1
NASH	GO:0070206	protein trimerization	1/11	54/18670	0.0313678870421894	0.047234039022421	0.0120390366522866	ADIPOQ	1
NASH	GO:0034248	regulation of cellular amide metabolic process	2/11	483/18670	0.0314745064780285	0.0473522709066768	0.0120691716569884	TNF/IL6	2
NASH	GO:0002011	morphogenesis of an epithelial sheet	1/11	55/18670	0.0319402416426695	0.0477121517445905	0.0121608982738047	PTEN	1
NASH	GO:0042304	regulation of fatty acid biosynthetic process	1/11	55/18670	0.0319402416426695	0.0477121517445905	0.0121608982738047	ADIPOQ	1
NASH	GO:0043030	regulation of macrophage activation	1/11	55/18670	0.0319402416426695	0.0477121517445905	0.0121608982738047	IL6	1
NASH	GO:0043954	cellular component maintenance	1/11	55/18670	0.0319402416426695	0.0477121517445905	0.0121608982738047	INS	1
NASH	GO:0044273	sulfur compound catabolic process	1/11	55/18670	0.0319402416426695	0.0477121517445905	0.0121608982738047	GGT1	1
NASH	GO:0046456	icosanoid biosynthetic process	1/11	55/18670	0.0319402416426695	0.0477121517445905	0.0121608982738047	GGT1	1
NASH	GO:0048016	inositol phosphate-mediated signaling	1/11	55/18670	0.0319402416426695	0.0477121517445905	0.0121608982738047	TNF	1
NASH	GO:0070830	bicellular tight junction assembly	1/11	55/18670	0.0319402416426695	0.0477121517445905	0.0121608982738047	TNF	1
NASH	GO:0006749	glutathione metabolic process	1/11	56/18670	0.0325122887735814	0.0483097059819088	0.0123132032113814	GGT1	1
NASH	GO:0060688	regulation of morphogenesis of a branching structure	1/11	56/18670	0.0325122887735814	0.0483097059819088	0.0123132032113814	TNF	1
NASH	GO:0090183	regulation of kidney development	1/11	56/18670	0.0325122887735814	0.0483097059819088	0.0123132032113814	ADIPOQ	1
NASH	GO:0120192	NA	1/11	56/18670	0.0325122887735814	0.0483097059819088	0.0123132032113814	TNF	1
NASH	GO:1903078	positive regulation of protein localization to plasma membrane	1/11	56/18670	0.0325122887735814	0.0483097059819088	0.0123132032113814	TNF	1
NASH	GO:1903202	negative regulation of oxidative stress-induced cell death	1/11	56/18670	0.0325122887735814	0.0483097059819088	0.0123132032113814	INS	1
NASH	GO:0010665	regulation of cardiac muscle cell apoptotic process	1/11	57/18670	0.0330840285835901	0.0487721681219154	0.0124310758043051	PTEN	1
NASH	GO:0043525	positive regulation of neuron apoptotic process	1/11	57/18670	0.0330840285835901	0.0487721681219154	0.0124310758043051	TNF	1
NASH	GO:0045981	positive regulation of nucleotide metabolic process	1/11	57/18670	0.0330840285835901	0.0487721681219154	0.0124310758043051	INS	1
NASH	GO:0060043	regulation of cardiac muscle cell proliferation	1/11	57/18670	0.0330840285835901	0.0487721681219154	0.0124310758043051	PTEN	1
NASH	GO:0071398	cellular response to fatty acid	1/11	57/18670	0.0330840285835901	0.0487721681219154	0.0124310758043051	PPARG	1
NASH	GO:1900408	negative regulation of cellular response to oxidative stress	1/11	57/18670	0.0330840285835901	0.0487721681219154	0.0124310758043051	INS	1
NASH	GO:1900544	positive regulation of purine nucleotide metabolic process	1/11	57/18670	0.0330840285835901	0.0487721681219154	0.0124310758043051	INS	1
NASH	GO:1903428	positive regulation of reactive oxygen species biosynthetic process	1/11	57/18670	0.0330840285835901	0.0487721681219154	0.0124310758043051	TNF	1
NASH	GO:2000272	negative regulation of receptor activity	1/11	57/18670	0.0330840285835901	0.0487721681219154	0.0124310758043051	PTEN	1
NASH	GO:0050900	leukocyte migration	2/11	499/18670	0.0334243407803374	0.0492307816563536	0.0125479674626221	TNF/IL6	2
NASH	GO:0031663	lipopolysaccharide-mediated signaling pathway	1/11	58/18670	0.0336554612212936	0.0493554849067709	0.0125797518925269	TNF	1
NASH	GO:0042093	T-helper cell differentiation	1/11	58/18670	0.0336554612212936	0.0493554849067709	0.0125797518925269	IL6	1
NASH	GO:0055081	anion homeostasis	1/11	58/18670	0.0336554612212936	0.0493554849067709	0.0125797518925269	INS	1
NASH	GO:0060997	dendritic spine morphogenesis	1/11	58/18670	0.0336554612212936	0.0493554849067709	0.0125797518925269	PTEN	1
NASH	GO:1902041	regulation of extrinsic apoptotic signaling pathway via death domain receptors	1/11	58/18670	0.0336554612212936	0.0493554849067709	0.0125797518925269	PTEN	1
NASH	GO:0001885	endothelial cell development	1/11	59/18670	0.0342265868352288	0.0498029350754409	0.0126937982263188	TNF	1
NASH	GO:0010662	regulation of striated muscle cell apoptotic process	1/11	59/18670	0.0342265868352288	0.0498029350754409	0.0126937982263188	PTEN	1
NASH	GO:0031102	neuron projection regeneration	1/11	59/18670	0.0342265868352288	0.0498029350754409	0.0126937982263188	PTEN	1
NASH	GO:0033619	membrane protein proteolysis	1/11	59/18670	0.0342265868352288	0.0498029350754409	0.0126937982263188	TNF	1
NASH	GO:0043388	positive regulation of DNA binding	1/11	59/18670	0.0342265868352288	0.0498029350754409	0.0126937982263188	PPARG	1
NASH	GO:0045071	negative regulation of viral genome replication	1/11	59/18670	0.0342265868352288	0.0498029350754409	0.0126937982263188	TNF	1
NASH	GO:0097755	NA	1/11	59/18670	0.0342265868352288	0.0498029350754409	0.0126937982263188	INS	1
NASH	GO:1902883	negative regulation of response to oxidative stress	1/11	59/18670	0.0342265868352288	0.0498029350754409	0.0126937982263188	INS	1
NASH	GO:2000351	regulation of endothelial cell apoptotic process	1/11	59/18670	0.0342265868352288	0.0498029350754409	0.0126937982263188	TNF	1
