# Supplementary material for: Anti-Autophagy Mechanism of Zhi Gan Prescription Based on Network Pharmacology in Nonalcoholic Steatohepatitis Rats
Source: Front Pharmacol. 2021 Jul 19;12:708479. doi: 10.3389/fphar.2021.708479 (PMC8326404; doi:10.3389/fphar.2021.708479)
Supplement: Supplementary file 1 [file DataSheet1.ZIP › FigShares/FigShares/NASH KEGG.csv]

Cluster	ID	Description	GeneRatio	BgRatio	pvalue	p.adjust	qvalue	geneID	Count
NASH	hsa04931	Insulin resistance	5/10	108/8033	9.56216371869623e-08	1.13789748252485e-05	5.93860694108503e-06	3630/7124/3569/5465/5728	5
NASH	hsa04932	Non-alcoholic fatty liver disease (NAFLD)	5/10	149/8033	4.80127700708466e-07	2.85675981921537e-05	1.49092286009471e-05	3630/7124/3569/5465/9370	5
NASH	hsa04930	Type II diabetes mellitus	3/10	46/8033	2.05071533221876e-05	0.000813450415113441	0.000424534051231252	3630/7124/9370	3
NASH	hsa04920	Adipocytokine signaling pathway	3/10	69/8033	6.97208533582172e-05	0.00207419538740696	0.00108250798635127	7124/5465/9370	3
NASH	hsa03320	PPAR signaling pathway	3/10	77/8033	9.68309945483701e-05	0.00230457767025121	0.00120274287965344	5465/5468/9370	3
NASH	hsa04211	Longevity regulating pathway	3/10	89/8033	0.000149147932988622	0.00295810067094099	0.0015438119379524	3630/5468/9370	3
NASH	hsa04152	AMPK signaling pathway	3/10	120/8033	0.00036139405220167	0.0061436988874284	0.00320635324509753	3630/5468/9370	3
NASH	hsa04068	FoxO signaling pathway	3/10	131/8033	0.000467767020106559	0.00695803442408506	0.00363134923503776	3630/3569/5728	3
NASH	hsa01523	Antifolate resistance	2/10	31/8033	0.000636247504197174	0.00841260588882929	0.00439047985352436	7124/3569	2
NASH	hsa04150	mTOR signaling pathway	3/10	155/8033	0.000765419505087389	0.00910849211053993	0.00475365797896378	3630/7124/5728	3
NASH	hsa05143	African trypanosomiasis	2/10	37/8033	0.000907644507252202	0.00981906330572837	0.00512450008879234	7124/3569	2
NASH	hsa05332	Graft-versus-host disease	2/10	41/8033	0.00111455361244186	0.0110526566567151	0.00576830378369035	7124/3569	2
NASH	hsa04940	Type I diabetes mellitus	2/10	43/8033	0.00122573792681973	0.0112202164070422	0.00585575203905784	3630/7124	2
NASH	hsa05144	Malaria	2/10	50/8033	0.00165510499413861	0.0140683924501781	0.00734219508678028	7124/3569	2
NASH	hsa05166	HTLV-I infection	3/10	219/8033	0.00208138995203689	0.0159635246404796	0.00833125124978589	7124/3569/5728	3
NASH	hsa05134	Legionellosis	2/10	57/8033	0.00214635625418213	0.0159635246404796	0.00833125124978589	7124/3569	2
NASH	hsa05321	Inflammatory bowel disease (IBD)	2/10	65/8033	0.00278242148657457	0.019476950406022	0.0101648834494056	7124/3569	2
NASH	hsa05133	Pertussis	2/10	76/8033	0.00378467725933006	0.0250209218811265	0.0130582431754663	7124/3569	2
NASH	hsa01521	EGFR tyrosine kinase inhibitor resistance	2/10	79/8033	0.00408328382823969	0.0255742513452907	0.0133470219316422	3569/5728	2
NASH	hsa05410	Hypertrophic cardiomyopathy (HCM)	2/10	90/8033	0.00526919705475764	0.0267994111689662	0.0139864242279435	7124/3569	2
NASH	hsa05323	Rheumatoid arthritis	2/10	93/8033	0.00561715599618147	0.0267994111689662	0.0139864242279435	7124/3569	2
NASH	hsa04657	IL-17 signaling pathway	2/10	94/8033	0.00573545357113081	0.0267994111689662	0.0139864242279435	7124/3569	2
NASH	hsa05215	Prostate cancer	2/10	97/8033	0.0060972456462052	0.0267994111689662	0.0139864242279435	3630/5728	2
NASH	hsa04640	Hematopoietic cell lineage	2/10	99/8033	0.00634416530078378	0.0267994111689662	0.0139864242279435	7124/3569	2
NASH	hsa04061	Viral protein interaction with cytokine and cytokine receptor	2/10	100/8033	0.00646933527057764	0.0267994111689662	0.0139864242279435	7124/3569	2
NASH	hsa04933	AGE-RAGE signaling pathway in diabetic complications	2/10	100/8033	0.00646933527057764	0.0267994111689662	0.0139864242279435	7124/3569	2
NASH	hsa05142	Chagas disease (American trypanosomiasis)	2/10	102/8033	0.00672308329672603	0.0267994111689662	0.0139864242279435	7124/3569	2
NASH	hsa05146	Amoebiasis	2/10	102/8033	0.00672308329672603	0.0267994111689662	0.0139864242279435	7124/3569	2
NASH	hsa05010	Alzheimer's disease	3/10	334/8033	0.0068733545000792	0.0267994111689662	0.0139864242279435	3630/7124/3569	3
NASH	hsa04620	Toll-like receptor signaling pathway	2/10	104/8033	0.00698135921208364	0.0267994111689662	0.0139864242279435	7124/3569	2
NASH	hsa04625	C-type lectin receptor signaling pathway	2/10	104/8033	0.00698135921208364	0.0267994111689662	0.0139864242279435	7124/3569	2
NASH	hsa04066	HIF-1 signaling pathway	2/10	109/8033	0.00764673116526668	0.0282775914264596	0.014757876109342	3630/3569	2
NASH	hsa04668	TNF signaling pathway	2/10	112/8033	0.00805935404268263	0.0282775914264596	0.014757876109342	7124/3569	2
NASH	hsa04151	PI3K-Akt signaling pathway	3/10	354/8033	0.00807931183613132	0.0282775914264596	0.014757876109342	3630/3569/5728	3
NASH	hsa04071	Sphingolipid signaling pathway	2/10	119/8033	0.00906080287394556	0.0304383835347266	0.0158855783153372	7124/5728	2
NASH	hsa05135	Yersinia infection	2/10	120/8033	0.00920825048109377	0.0304383835347266	0.0158855783153372	7124/3569	2
NASH	hsa04380	Osteoclast differentiation	2/10	128/8033	0.0104268269866233	0.0335349300380586	0.0175016441596237	7124/5468	2
NASH	hsa04140	Regulation of autophagy	2/10	137/8033	0.0118795110106044	0.0372016265858401	0.0194152673026499	3630/5728	2
NASH	hsa00430	Taurine and hypotaurine metabolism	1/10	11/8033	0.0136170239822929	0.0415493808690476	0.0216843296884017	2678	1
NASH	hsa05160	Hepatitis C	2/10	155/8033	0.0150380770393155	0.0447382791919636	0.0233485932978846	7124/5465	2
NASH	hsa04218	Cellular senescence	2/10	160/8033	0.0159739630333054	0.0463400386070068	0.0241845402725644	3569/5728	2
NASH	hsa05161	Hepatitis B	2/10	162/8033	0.0163553077436495	0.0463400386070068	0.0241845402725644	7124/3569	2
NASH	hsa05164	Influenza A	2/10	170/8033	0.0179201830189426	0.049593064633818	0.0258822716797458	7124/3569	2
