# Supplementary material for: Anti-Autophagy Mechanism of Zhi Gan Prescription Based on Network Pharmacology in Nonalcoholic Steatohepatitis Rats
Source: Front Pharmacol. 2021 Jul 19;12:708479. doi: 10.3389/fphar.2021.708479 (PMC8326404; doi:10.3389/fphar.2021.708479)
Supplement: Supplementary file 1 [file DataSheet1.ZIP › FigShares/FigShares/NASH molecular function.csv]

Cluster	ID	Description	GeneRatio	BgRatio	pvalue	p.adjust	qvalue	geneID	Count
NASH	GO:0002020	protease binding	3/11	128/17697	5.84528249385698e-05	0.003776055332245	0.00128352758003942	INS/TNF/PTEN	3
NASH	GO:0048018	receptor agonist activity	4/11	482/17697	0.000154022257696819	0.003776055332245	0.00128352758003942	INS/TNF/IL6/ADIPOQ	4
NASH	GO:0005504	fatty acid binding	2/11	34/17697	0.000194925057793217	0.003776055332245	0.00128352758003942	PPARA/PPARG	2
NASH	GO:0031406	carboxylic acid binding	3/11	193/17697	0.000197562924630607	0.003776055332245	0.00128352758003942	PPARA/PPARG/ADIPOQ	3
NASH	GO:0001103	RNA polymerase II repressing transcription factor binding	2/11	35/17697	0.000206668597252891	0.003776055332245	0.00128352758003942	PPARA/PPARG	2
NASH	GO:0043177	organic acid binding	3/11	205/17697	0.000236003458265312	0.003776055332245	0.00128352758003942	PPARA/PPARG/ADIPOQ	3
NASH	GO:0005125	cytokine activity	3/11	220/17697	0.000290497152992951	0.0039839609553319	0.00135419725455361	TNF/IL6/ADIPOQ	3
NASH	GO:0004879	RNA polymerase II transcription factor activity, ligand-activated sequence-specific DNA binding	2/11	47/17697	0.000373951957293583	0.00398882087779821	0.00135584920188317	PPARA/PPARG	2
NASH	GO:0098531	transcription factor activity, direct ligand regulated sequence-specific DNA binding	2/11	47/17697	0.000373951957293583	0.00398882087779821	0.00135584920188317	PPARA/PPARG	2
NASH	GO:0003707	steroid hormone receptor activity	2/11	56/17697	0.000531110986782473	0.00509866547311174	0.0017330990095007	PPARA/PPARG	2
NASH	GO:0033293	monocarboxylic acid binding	2/11	64/17697	0.000693388809241213	0.00605139324428695	0.00205694287908877	PPARA/PPARG	2
NASH	GO:0030374	ligand-dependent nuclear receptor transcription coactivator activity	2/11	67/17697	0.00075968437681716	0.00607747501453728	0.0020658083930993	PPARA/PPARG	2
NASH	GO:0070491	repressing transcription factor binding	2/11	71/17697	0.000852671438828098	0.00629665062519211	0.00214030887479118	PPARA/PPARG	2
NASH	GO:0005179	hormone activity	2/11	122/17697	0.00248919697698048	0.0170687792707233	0.00580188769070638	INS/ADIPOQ	2
NASH	GO:0070851	growth factor receptor binding	2/11	134/17697	0.00299297572206191	0.0191550446211962	0.00651103490413469	IL6/PTEN	2
NASH	GO:0001085	RNA polymerase II transcription factor binding	2/11	155/17697	0.00398021412700135	0.0238812847620081	0.00811754196954222	PPARA/PPARG	2
NASH	GO:0019902	phosphatase binding	2/11	185/17697	0.00561856632863118	0.0312570400982561	0.0106246517877844	PPARA/PPARG	2
NASH	GO:0004955	prostaglandin receptor activity	1/11	10/17697	0.00619995789471417	0.0312570400982561	0.0106246517877844	PPARG	1
NASH	GO:0005351	sugar:proton symporter activity	1/11	10/17697	0.00619995789471417	0.0312570400982561	0.0106246517877844	SLC17A5	1
NASH	GO:0004954	prostanoid receptor activity	1/11	11/17697	0.00681802768965711	0.0312570400982561	0.0106246517877844	PPARG	1
NASH	GO:0004438	phosphatidylinositol-3-phosphatase activity	1/11	12/17697	0.00743574801621005	0.0312570400982561	0.0106246517877844	PTEN	1
NASH	GO:0033691	sialic acid binding	1/11	12/17697	0.00743574801621005	0.0312570400982561	0.0106246517877844	ADIPOQ	1
NASH	GO:0052744	phosphatidylinositol monophosphate phosphatase activity	1/11	13/17697	0.00805311905221906	0.0312570400982561	0.0106246517877844	PTEN	1
NASH	GO:0036041	long-chain fatty acid binding	1/11	14/17697	0.0086701409754506	0.0312570400982561	0.0106246517877844	PPARG	1
NASH	GO:0052745	inositol phosphate phosphatase activity	1/11	14/17697	0.0086701409754506	0.0312570400982561	0.0106246517877844	PTEN	1
NASH	GO:0004953	icosanoid receptor activity	1/11	15/17697	0.00928681396359021	0.0312570400982561	0.0106246517877844	PPARG	1
NASH	GO:0005161	platelet-derived growth factor receptor binding	1/11	15/17697	0.00928681396359021	0.0312570400982561	0.0106246517877844	PTEN	1
NASH	GO:0008242	omega peptidase activity	1/11	15/17697	0.00928681396359021	0.0312570400982561	0.0106246517877844	GGT1	1
NASH	GO:0001227	transcriptional repressor activity, RNA polymerase II transcription regulatory region sequence-specific binding	2/11	242/17697	0.00944223086301487	0.0312570400982561	0.0106246517877844	PPARA/PPARG	2
NASH	GO:0005159	insulin-like growth factor receptor binding	1/11	16/17697	0.00990313819424282	0.0315573415348003	0.0107267279339782	INS	1
NASH	GO:0046965	retinoid X receptor binding	1/11	17/17697	0.0105191138449334	0.0315573415348003	0.0107267279339782	PPARG	1
NASH	GO:1990381	ubiquitin-specific protease binding	1/11	17/17697	0.0105191138449334	0.0315573415348003	0.0107267279339782	PTEN	1
NASH	GO:0016755	transferase activity, transferring amino-acyl groups	1/11	18/17697	0.0111347410931072	0.0322286266042347	0.0109549059729307	GGT1	1
NASH	GO:0016791	phosphatase activity	2/11	270/17697	0.0116475698145256	0.0322286266042347	0.0109549059729307	PON1/PTEN	2
NASH	GO:0005402	cation:sugar symporter activity	1/11	19/17697	0.0117500201161272	0.0322286266042347	0.0109549059729307	SLC17A5	1
NASH	GO:0008483	transaminase activity	1/11	21/17697	0.0129795341957645	0.0332667102466046	0.0113077633513678	GPT	1
NASH	GO:0005126	cytokine receptor binding	2/11	286/17697	0.0130009270384036	0.0332667102466046	0.0113077633513678	TNF/IL6	2
NASH	GO:0005158	insulin receptor binding	1/11	22/17697	0.0135937696067086	0.0332667102466046	0.0113077633513678	INS	1
NASH	GO:0001223	transcription coactivator binding	1/11	23/17697	0.014207657501154	0.0332667102466046	0.0113077633513678	PPARA	1
NASH	GO:0016769	transferase activity, transferring nitrogenous groups	1/11	23/17697	0.014207657501154	0.0332667102466046	0.0113077633513678	GPT	1
NASH	GO:0034593	phosphatidylinositol bisphosphate phosphatase activity	1/11	23/17697	0.014207657501154	0.0332667102466046	0.0113077633513678	PTEN	1
NASH	GO:0015295	solute:proton symporter activity	1/11	24/17697	0.0148211980560643	0.033877024128147	0.0115152165347868	SLC17A5	1
NASH	GO:0003713	transcription coactivator activity	2/11	319/17697	0.016000095118278	0.0350121553194159	0.0119010615669067	PPARA/PPARG	2
NASH	GO:0042974	retinoic acid receptor binding	1/11	26/17697	0.0160472378547323	0.0350121553194159	0.0119010615669067	PPARG	1
NASH	GO:0052866	phosphatidylinositol phosphate phosphatase activity	1/11	27/17697	0.0166597374520158	0.035540773230967	0.0120807452868418	PTEN	1
NASH	GO:1901567	fatty acid derivative binding	1/11	28/17697	0.0172718904168165	0.0360456843481389	0.0122523707762314	PPARG	1
NASH	GO:0005164	tumor necrosis factor receptor binding	1/11	31/17697	0.019106271281552	0.0386293018408201	0.0131305740906296	TNF	1
NASH	GO:0031624	ubiquitin conjugating enzyme binding	1/11	32/17697	0.0197170394812519	0.0386293018408201	0.0131305740906296	PPARA	1
NASH	GO:0035255	ionotropic glutamate receptor binding	1/11	32/17697	0.0197170394812519	0.0386293018408201	0.0131305740906296	PTEN	1
NASH	GO:0042578	phosphoric ester hydrolase activity	2/11	367/17697	0.020844212696927	0.0400208883780999	0.0136035914443103	PON1/PTEN	2
NASH	GO:0015144	carbohydrate transmembrane transporter activity	1/11	37/17697	0.0227656977448255	0.041235980820816	0.0140166162877774	SLC17A5	1
NASH	GO:0044390	ubiquitin-like protein conjugating enzyme binding	1/11	37/17697	0.0227656977448255	0.041235980820816	0.0140166162877774	PPARA	1
NASH	GO:0051393	alpha-actinin binding	1/11	37/17697	0.0227656977448255	0.041235980820816	0.0140166162877774	PPARG	1
NASH	GO:0030331	estrogen receptor binding	1/11	42/17697	0.0258057342432584	0.0458768608769038	0.0155941084121055	PPARG	1
NASH	GO:0001221	transcription cofactor binding	1/11	43/17697	0.0264127088636675	0.0459361147503707	0.015614249531376	PPARA	1
NASH	GO:1901505	carbohydrate derivative transporter activity	1/11	44/17697	0.0270193396670263	0.0459361147503707	0.015614249531376	SLC17A5	1
NASH	GO:0008138	protein tyrosine/serine/threonine phosphatase activity	1/11	45/17697	0.0276256268286226	0.0459361147503707	0.015614249531376	PTEN	1
NASH	GO:0032813	tumor necrosis factor receptor superfamily binding	1/11	46/17697	0.0282315705236653	0.0459361147503707	0.015614249531376	TNF	1
NASH	GO:0042805	actinin binding	1/11	46/17697	0.0282315705236653	0.0459361147503707	0.015614249531376	PPARG	1
NASH	GO:0035254	glutamate receptor binding	1/11	47/17697	0.028837170927282	0.0461394734836512	0.015683373662206	PTEN	1
NASH	GO:0070888	E-box binding	1/11	50/17697	0.0306519141396775	0.0482390779903121	0.0163970550186368	PPARG	1
